# Supplementary material for: RNA-Binding Proteins Direct Myogenic Cell Fate Decisions
Source: bioRxiv preprint, doi:10.1101/2021.03.14.435333, version 1 (2021-03-14)
Supplement: Supplementary Table 3 [file 435333_file06.xlsx]

## Sheet: Table 3
Differential Gene Expression (DESeq2, Love et al., Genome Biology, 2014)
Tab 1 - DESeq2 analysis of Hnrnpa2b1 KO v WT, 48 hour differentiation

## Sheet: DESeq2_a2b1_ko_v_wt
	baseMean	log2FoldChange	lfcSE	stat	pvalue	padj
ENSMUSG00000098104	3.3795	0.391858	1.28066	0.305982	0.759618	NA
ENSMUSG00000103922	17.9641	0.107682	0.544816	0.197648	0.84332	0.915299
ENSMUSG00000033845	2141.67	0.700292	0.212775	3.29124	0.000997472	0.00689364
ENSMUSG00000102275	14.3136	0.689111	0.727996	0.946587	0.343849	0.540732
ENSMUSG00000025903	1725.4	-0.492145	0.172446	-2.85391	0.00431842	0.0221955
ENSMUSG00000033813	3988.44	0.443295	0.206151	2.15034	0.0315282	0.100378
ENSMUSG00000062588	6.4266	-0.656188	0.920538	-0.712831	0.47595	0.661235
ENSMUSG00000103280	9.87404	-1.00995	0.81813	-1.23446	0.217033	0.399435
ENSMUSG00000002459	64.5145	-0.650521	0.371709	-1.75008	0.0801039	0.19927
ENSMUSG00000033793	2467.34	-0.196309	0.175182	-1.1206	0.262457	0.453058
ENSMUSG00000025907	5043.98	0.344204	0.162261	2.1213	0.0338969	0.1058
ENSMUSG00000090031	152.624	0.0208464	0.323161	0.0645078	0.948566	0.973202
ENSMUSG00000103355	1.9448	3.43282	1.93772	1.77158	0.0764651	NA
ENSMUSG00000033740	9.37935	2.68409	0.909566	2.95096	0.00316789	0.0174683
ENSMUSG00000102135	2.80555	1.29363	1.51078	0.856267	0.39185	NA
ENSMUSG00000103629	10.2617	3.29619	1.00944	3.26536	0.00109324	0.00744083
ENSMUSG00000051285	2636.8	0.591483	0.180145	3.28338	0.00102572	0.00704616
ENSMUSG00000098201	2.87573	0.390194	1.314	0.296951	0.766504	NA
ENSMUSG00000103509	87.6785	-0.508517	0.572994	-0.887474	0.374823	0.570558
ENSMUSG00000048538	9.65352	0.29768	0.788465	0.377544	0.705769	0.830102
ENSMUSG00000097797	4.59923	-1.68908	1.12481	-1.50166	0.133185	0.285015
ENSMUSG00000025909	5.04324	2.16637	1.07054	2.02364	0.0430077	0.125967
ENSMUSG00000086235	4.93382	0.242812	1.00462	0.241696	0.809016	0.895619
ENSMUSG00000084353	4.01178	0.450914	1.08223	0.416654	0.676932	0.810892
ENSMUSG00000103933	2.45734	-0.824299	1.53191	-0.538085	0.590519	NA
ENSMUSG00000061024	1265.03	-0.0955595	0.186928	-0.511211	0.609204	0.764353
ENSMUSG00000025911	22.0347	-0.111656	0.517906	-0.215592	0.829306	0.90682
ENSMUSG00000079671	5.97829	0.229077	0.914961	0.250368	0.802303	0.890956
ENSMUSG00000067879	1.97084	0.290782	1.74043	0.167074	0.867312	NA
ENSMUSG00000025912	203.619	0.411363	0.274685	1.49758	0.134242	0.286463
ENSMUSG00000045210	2422.11	-0.217706	0.196579	-1.10747	0.268089	0.459163
ENSMUSG00000097893	4.66459	0.543036	1.13697	0.477616	0.632924	0.78139
ENSMUSG00000025915	116.768	-1.077	0.381618	-2.82221	0.00476946	0.0239172
ENSMUSG00000046101	29.7093	-0.794807	0.510508	-1.55689	0.119496	0.264387
ENSMUSG00000098234	694.065	0.382236	0.19656	1.94463	0.0518199	0.14462
ENSMUSG00000093178	10.3634	-0.0276043	0.912653	-0.0302463	0.975871	0.987123
ENSMUSG00000025917	1981.96	-0.0935302	0.199092	-0.469785	0.638509	0.785564
ENSMUSG00000056763	790.522	-0.575228	0.226822	-2.53603	0.0112117	0.0460006
ENSMUSG00000102356	2.18394	-1.037	1.73721	-0.596936	0.55055	NA
ENSMUSG00000067851	2861.81	0.492106	0.179361	2.74367	0.00607572	0.0289082
ENSMUSG00000088153	1.51053	-0.948677	2.14348	-0.442587	0.658064	NA
ENSMUSG00000102556	9.7067	-1.27742	0.90451	-1.41228	0.157868	0.321124
ENSMUSG00000048960	4.08857	1.53645	1.13997	1.3478	0.177724	0.347806
ENSMUSG00000016918	1593.9	1.1943	0.903514	1.32184	0.186221	0.358786
ENSMUSG00000025938	728.058	2.86236	0.345326	8.28885	1.14e-16	1.37e-14
ENSMUSG00000005886	1975.66	0.133022	0.192333	0.69162	0.489176	0.672887
ENSMUSG00000103506	21.4327	-0.945572	0.631172	-1.49812	0.134102	0.286413
ENSMUSG00000103495	6.79959	-0.54727	1.10425	-0.495603	0.620174	0.772023
ENSMUSG00000104170	4.114	-0.145278	1.08282	-0.134166	0.893271	0.944397
ENSMUSG00000103085	7.90557	-0.944793	0.926494	-1.01975	0.307846	0.502693
ENSMUSG00000102664	5.01276	-1.89289	1.34427	-1.40811	0.159097	0.322857
ENSMUSG00000025935	5280.23	-0.0674401	0.163986	-0.411256	0.680885	0.813135
ENSMUSG00000025937	2921.71	0.310602	0.192588	1.61278	0.106793	0.243332
ENSMUSG00000102982	13.416	-0.197828	0.627781	-0.315122	0.752669	0.859841
ENSMUSG00000025932	846.365	0.231408	0.35187	0.657653	0.510761	0.690474
ENSMUSG00000095853	2.3359	0.26468	1.45015	0.182519	0.855175	NA
ENSMUSG00000102588	2.2004	3.61902	1.95638	1.84985	0.0643351	NA
ENSMUSG00000054493	7.92333	-3.31666	1.40571	-2.35942	0.0183034	0.0669546
ENSMUSG00000025930	39.0971	-1.66268	0.727687	-2.28488	0.0223196	0.0779613
ENSMUSG00000082193	18.4893	0.837187	0.63948	1.30917	0.190478	0.364554
ENSMUSG00000025925	465.355	0.217628	0.189038	1.15124	0.249633	0.438383
ENSMUSG00000043716	35955.5	0.464492	0.210103	2.21079	0.0270505	0.0898793
ENSMUSG00000025921	650.675	-0.827868	0.294234	-2.81363	0.00489849	0.0244102
ENSMUSG00000100868	1.79226	-0.601305	1.96396	-0.30617	0.759475	NA
ENSMUSG00000025920	1538.87	0.868429	0.264904	3.27828	0.00104442	0.0071545
ENSMUSG00000025939	2021.45	-0.161525	0.199453	-0.809837	0.418034	0.610124
ENSMUSG00000102457	13.2553	-0.749855	0.702253	-1.06778	0.285618	0.478466
ENSMUSG00000079658	1758.87	-0.279309	0.156976	-1.77931	0.0751894	0.190183
ENSMUSG00000097744	2.87605	-0.741438	1.31778	-0.562644	0.573678	NA
ENSMUSG00000100959	2.54337	-1.87673	1.70822	-1.09864	0.271923	NA
ENSMUSG00000025940	1752	0.556579	0.203721	2.73206	0.00629395	0.0296579
ENSMUSG00000025779	80.6348	-0.25963	0.312709	-0.830263	0.40639	0.599457
ENSMUSG00000091020	17.1138	-0.0824266	0.604772	-0.136294	0.891589	0.943689
ENSMUSG00000042686	5171.01	0.94028	0.332623	2.82687	0.0047006	0.0236691
ENSMUSG00000025777	3.90481	1.35589	1.3144	1.03157	0.302275	NA
ENSMUSG00000101589	1.94087	1.05355	1.77451	0.593712	0.552705	NA
ENSMUSG00000067780	1504.08	-2.0648	0.388412	-5.31602	1.06e-07	2.75e-06
ENSMUSG00000100053	4.21223	-1.66295	1.54105	-1.0791	0.280543	0.472684
ENSMUSG00000067773	26.4073	6.38643	1.20784	5.28746	1.24e-07	3.16e-06
ENSMUSG00000101685	2.08379	0.700466	1.67561	0.418036	0.675921	NA
ENSMUSG00000100720	2.39143	-0.696143	1.88572	-0.369165	0.712005	NA
ENSMUSG00000100204	3.29604	0.482894	1.25847	0.383716	0.701189	NA
ENSMUSG00000043760	1787.77	1.59698	0.762896	2.09332	0.0363208	0.111239
ENSMUSG00000090142	10.9822	1.4883	0.832544	1.78766	0.0738315	0.18779
ENSMUSG00000099906	7206.63	0.486389	0.399524	1.21742	0.223444	0.406942
ENSMUSG00000041872	3.12158	-2.23934	1.78678	-1.25328	0.210103	NA
ENSMUSG00000041859	690.56	-1.07165	0.208246	-5.14608	2.66e-07	6.16e-06
ENSMUSG00000097934	1.87072	1.09662	1.95212	0.561759	0.57428	NA
ENSMUSG00000025931	622.931	1.95743	0.359003	5.45242	4.97e-08	1.42e-06
ENSMUSG00000041809	12.2139	0.420818	0.87703	0.479822	0.631354	0.780371
ENSMUSG00000041779	273.297	0.455643	0.251773	1.80974	0.0703366	0.180864
ENSMUSG00000099971	2.12096	-0.944684	1.55044	-0.609301	0.542325	NA
ENSMUSG00000025933	20.2901	-1.02312	0.815118	-1.25518	0.209414	0.390072
ENSMUSG00000025934	5.77896	0.91754	1.02588	0.894395	0.37111	0.567101
ENSMUSG00000096375	2.57187	1.64504	1.42264	1.15633	0.247548	NA
ENSMUSG00000082935	44.4849	0.53162	0.381762	1.39254	0.163758	0.329271
ENSMUSG00000102766	3.19271	-1.3876	1.38693	-1.00049	0.317075	NA
ENSMUSG00000097970	8.62831	0.0697691	0.784703	0.0889114	0.929152	0.963905
ENSMUSG00000026158	180.278	0.240885	0.236286	1.01946	0.307983	0.502868
ENSMUSG00000026156	18.1486	-0.215652	0.624914	-0.345091	0.730026	0.845723
ENSMUSG00000026155	846.382	-0.089539	0.179392	-0.499125	0.617691	0.770088
ENSMUSG00000026154	226.901	0.00373349	0.324844	0.0114932	0.99083	0.994826
ENSMUSG00000102495	1.78735	-3.08093	2.08095	-1.48054	0.138729	NA
ENSMUSG00000026153	2285.69	0.394364	0.160035	2.46423	0.0137306	0.0535238
ENSMUSG00000102398	11.3725	-1.56556	0.796996	-1.96433	0.0494915	0.13969
ENSMUSG00000026141	2.78739	-0.359827	1.48539	-0.242245	0.80859	NA
ENSMUSG00000100131	122.257	-0.675239	0.416909	-1.61963	0.105311	0.240919
ENSMUSG00000067736	42.8931	-0.252802	0.54394	-0.46476	0.642103	0.788511
ENSMUSG00000101939	501.338	0.250071	0.266897	0.936957	0.348781	0.545552
ENSMUSG00000101111	911.804	-0.724231	0.284989	-2.54126	0.0110453	0.0454651
ENSMUSG00000100862	996.704	-0.198352	0.309736	-0.640391	0.521918	0.699262
ENSMUSG00000102070	773.861	-0.179281	0.325697	-0.550454	0.582008	0.744571
ENSMUSG00000101249	1347.78	0.274186	0.329593	0.831891	0.40547	0.598668
ENSMUSG00000073725	1790.1	-0.233107	0.213513	-1.09177	0.274933	0.466605
ENSMUSG00000086240	21.5918	0.0479882	0.527747	0.0909303	0.927548	0.962948
ENSMUSG00000099492	43.5133	0.813687	0.375604	2.16634	0.0302849	0.0973179
ENSMUSG00000048874	4652.63	0.0509373	0.164065	0.310471	0.756203	0.862208
ENSMUSG00000103783	14.1917	-0.552722	0.757246	-0.729911	0.465445	0.651136
ENSMUSG00000104315	21.8943	-0.617683	0.667375	-0.925541	0.354684	0.551184
ENSMUSG00000026064	1527.01	0.179331	0.164636	1.08926	0.27604	0.467584
ENSMUSG00000050217	1.72906	3.26939	2.05255	1.59285	0.111195	NA
ENSMUSG00000070960	5.11233	0.522038	1.04279	0.500618	0.61664	0.769563
ENSMUSG00000026058	3.37082	4.2951	1.7415	2.46632	0.0136509	NA
ENSMUSG00000100481	23.7923	0.311795	0.476508	0.654334	0.512897	0.69183
ENSMUSG00000026134	452.169	-0.80769	0.204743	-3.94489	7.98e-05	0.000859947
ENSMUSG00000103746	5.70393	0.496704	1.08996	0.45571	0.648599	0.793696
ENSMUSG00000102198	1.7585	0.834199	1.86289	0.447798	0.654299	NA
ENSMUSG00000004768	635.07	-1.06633	0.287197	-3.71289	0.000204905	0.00188436
ENSMUSG00000042215	1766.6	0.563998	0.202475	2.78552	0.00534419	0.0261402
ENSMUSG00000042197	2338.28	-0.59921	0.248472	-2.41158	0.0158837	0.0601351
ENSMUSG00000081402	5.13813	-0.908053	1.00508	-0.903465	0.366279	0.562628
ENSMUSG00000042182	826.759	0.707127	0.300092	2.35637	0.0184548	0.0674362
ENSMUSG00000104416	7.66252	-0.596546	0.866799	-0.688218	0.491316	0.674479
ENSMUSG00000026131	1747.65	-0.59895	0.313142	-1.91271	0.0557855	0.152869
ENSMUSG00000103596	2.54335	-3.61987	1.90232	-1.90287	0.0570576	NA
ENSMUSG00000103364	15.8454	-1.01688	0.938629	-1.08337	0.278643	0.470689
ENSMUSG00000105982	3.54276	1.29905	1.32842	0.977895	0.328126	NA
ENSMUSG00000096992	120.773	-1.25303	0.500578	-2.50317	0.0123086	0.0493412
ENSMUSG00000104475	26.8773	-0.632411	0.664026	-0.952389	0.3409	0.537402
ENSMUSG00000103001	25.5312	-0.187457	0.489136	-0.38324	0.701542	0.827463
ENSMUSG00000102336	1.55423	-1.75594	1.98256	-0.885695	0.375782	NA
ENSMUSG00000042111	1546.57	-0.103235	0.189446	-0.544931	0.585801	0.747045
ENSMUSG00000026127	1007.17	-0.653175	0.177172	-3.68668	0.000227197	0.00205728
ENSMUSG00000026126	2.78489	0.111758	1.52316	0.0733725	0.94151	NA
ENSMUSG00000100280	1.8461	-2.00111	1.97003	-1.01578	0.309735	NA
ENSMUSG00000037509	64.3287	1.32828	0.333255	3.98576	6.73e-05	0.000740395
ENSMUSG00000104002	5.70568	0.916724	0.956257	0.958658	0.337731	0.534291
ENSMUSG00000037503	4209.79	-0.341924	0.199957	-1.70999	0.0872677	0.211036
ENSMUSG00000104358	21.0956	-1.42897	0.723112	-1.97614	0.0481394	0.136827
ENSMUSG00000026123	3177.16	0.524573	0.235902	2.22369	0.0261694	0.0877014
ENSMUSG00000103548	2.56442	-0.126786	1.43152	-0.0885672	0.929426	NA
ENSMUSG00000104417	3.37392	0.246968	1.29868	0.190168	0.849177	NA
ENSMUSG00000102531	3.70576	0.866257	1.477	0.586497	0.557542	NA
ENSMUSG00000102434	3.17253	-1.32031	1.39095	-0.949217	0.34251	NA
ENSMUSG00000045216	3292.28	0.203245	0.271431	0.74879	0.453984	0.642033
ENSMUSG00000102202	13.9275	-0.597151	0.727398	-0.820941	0.41168	0.604601
ENSMUSG00000037470	9248.1	0.203082	0.202835	1.00122	0.316722	0.511956
ENSMUSG00000037447	2127.91	-0.139251	0.303245	-0.459205	0.646087	0.791472
ENSMUSG00000102762	2.2416	-1.14859	1.58653	-0.723967	0.469086	NA
ENSMUSG00000010453	3233.01	0.176172	0.202952	0.868047	0.385369	0.580411
ENSMUSG00000037432	170.448	0.503416	0.36776	1.36887	0.17104	0.339125
ENSMUSG00000001143	1651.97	0.61208	0.30137	2.03099	0.0422561	0.124319
ENSMUSG00000037408	1863.27	-0.197134	0.373575	-0.527697	0.59771	0.756223
ENSMUSG00000104316	7.58858	-1.31682	0.864013	-1.52408	0.12749	0.276074
ENSMUSG00000001138	879.861	0.13416	0.170356	0.787531	0.430971	0.621932
ENSMUSG00000067653	38.896	-0.885751	0.432033	-2.05019	0.0403458	0.12021
ENSMUSG00000079610	213.983	0.531669	0.275612	1.92905	0.0537247	0.148555
ENSMUSG00000026121	1186.76	-0.50063	0.190974	-2.62146	0.00875547	0.0382339
ENSMUSG00000087589	99.9769	0.622951	0.28448	2.18979	0.0285395	0.0933285
ENSMUSG00000046337	11.9591	0.649738	0.697817	0.931101	0.351801	0.548277
ENSMUSG00000061518	6490.86	0.287399	0.245939	1.16858	0.242573	0.430136
ENSMUSG00000037351	6536.23	0.472652	0.204425	2.31211	0.0207716	0.0737133
ENSMUSG00000102416	3.95428	-0.575922	1.38998	-0.41434	0.678625	0.811716
ENSMUSG00000026117	47.2375	0.608127	0.560981	1.08404	0.278346	0.470234
ENSMUSG00000026116	1697.14	-0.103588	0.174701	-0.592946	0.553217	0.722243
ENSMUSG00000102930	3.18144	0.771523	1.44928	0.532348	0.594485	NA
ENSMUSG00000103159	8.08475	-1.44835	0.987701	-1.46639	0.142542	0.298761
ENSMUSG00000026113	627.727	1.10485	0.253905	4.35144	1.35e-05	0.000191027
ENSMUSG00000086064	2.4886	-0.920805	1.55834	-0.590888	0.554595	NA
ENSMUSG00000026112	3031.21	0.429234	0.17714	2.42314	0.0153869	0.0586046
ENSMUSG00000026111	767.653	-0.0953625	0.21602	-0.441451	0.658886	0.799651
ENSMUSG00000026110	45.6093	-0.0946504	0.414417	-0.228394	0.81934	0.901274
ENSMUSG00000060771	575.854	0.505592	0.234646	2.1547	0.0311854	0.0996127
ENSMUSG00000097268	2.53413	0.822023	1.37208	0.599105	0.549103	NA
ENSMUSG00000037216	362.028	0.564386	0.261962	2.15445	0.0312046	0.09964
ENSMUSG00000026088	296.967	-0.535057	0.212786	-2.51453	0.0119192	0.0481867
ENSMUSG00000026087	2160.65	0.549449	0.197966	2.77547	0.00551213	0.0267303
ENSMUSG00000058407	3232.7	-0.258568	0.150654	-1.7163	0.0861077	0.209155
ENSMUSG00000026083	3735.3	-0.186013	0.18234	-1.02015	0.30766	0.502484
ENSMUSG00000026082	784.757	-0.0338631	0.164292	-0.206116	0.8367	0.911577
ENSMUSG00000103804	14.0231	0.181977	0.794561	0.229029	0.818847	0.901267
ENSMUSG00000037138	213.661	-4.32995	1.0177	-4.25465	2.09e-05	0.000278921
ENSMUSG00000085391	1.7062	-1.11293	2.00714	-0.554485	0.579247	NA
ENSMUSG00000026080	21.6162	-2.35261	0.889636	-2.64447	0.00818201	0.0363799
ENSMUSG00000026078	3607.21	0.0515888	0.176194	0.292796	0.769678	0.871224
ENSMUSG00000103046	42.7364	-0.934792	0.544483	-1.71684	0.086008	0.209091
ENSMUSG00000073702	17465.4	0.592817	0.209285	2.83258	0.00461738	0.0233738
ENSMUSG00000003134	1788.08	1.30072	0.362278	3.5904	0.000330174	0.0027769
ENSMUSG00000003135	1446.06	-0.527703	0.159494	-3.30861	0.000937619	0.00654123
ENSMUSG00000085894	13.5405	0.573272	0.633625	0.90475	0.365598	0.562117
ENSMUSG00000077704	7.10567	0.192103	0.88663	0.216667	0.828468	0.90654
ENSMUSG00000048234	623.326	-0.760045	0.207587	-3.66134	0.000250902	0.00223176
ENSMUSG00000064936	3.71532	-2.55643	1.44338	-1.77114	0.0765368	NA
ENSMUSG00000026074	16889.7	0.289164	0.146355	1.97578	0.0481798	0.136896
ENSMUSG00000026072	919.731	-1.24373	0.273108	-4.55397	5.26e-06	8.44e-05
ENSMUSG00000103560	6.0714	-3.98387	1.34426	-2.96363	0.00304036	0.0169123
ENSMUSG00000026069	10.6116	-1.74537	1.02072	-1.70994	0.0872766	0.211036
ENSMUSG00000026068	24.4709	0.727815	0.704096	1.03369	0.301283	0.496239
ENSMUSG00000102676	6.97974	1.4433	1.1325	1.27443	0.202511	0.381327
ENSMUSG00000026062	313.328	0.0280576	0.51082	0.0549265	0.956197	0.977093
ENSMUSG00000041945	17.1141	0.787324	0.587307	1.34057	0.180061	0.350632
ENSMUSG00000079588	12249.5	-0.860103	0.408606	-2.10497	0.035294	0.109031
ENSMUSG00000094136	1.90257	-3.15124	2.01733	-1.56209	0.118268	NA
ENSMUSG00000060679	1881.92	0.633923	0.190367	3.33001	0.000868424	0.00616365
ENSMUSG00000070939	985.306	-0.078651	0.169229	-0.46476	0.642103	0.788511
ENSMUSG00000041878	25.0572	0.144567	0.547096	0.264244	0.791592	0.88469
ENSMUSG00000010290	1904.13	0.162603	0.188459	0.862806	0.388244	0.583548
ENSMUSG00000008136	1598.82	0.450797	0.218361	2.06446	0.0389744	0.117207
ENSMUSG00000094497	386.128	0.776842	0.284984	2.72592	0.00641227	0.030091
ENSMUSG00000066877	1727.18	0.214412	0.169779	1.26289	0.20663	0.386485
ENSMUSG00000103422	5.6396	-0.682964	1.03407	-0.660463	0.508957	0.688906
ENSMUSG00000103945	12.1593	-0.10059	0.697861	-0.144141	0.885389	0.940345
ENSMUSG00000026051	26.6673	0.875256	0.538951	1.624	0.104376	0.239452
ENSMUSG00000100764	3.68515	-0.364708	1.24014	-0.294087	0.768692	NA
ENSMUSG00000100635	4.28019	0.220315	1.11596	0.197421	0.843498	0.915299
ENSMUSG00000100480	8.12417	0.453242	0.8278	0.547525	0.584018	0.746051
ENSMUSG00000057363	2783.87	-0.0625155	0.161075	-0.388114	0.697932	0.825026
ENSMUSG00000090243	1.77808	-3.07242	2.34152	-1.31215	0.18947	NA
ENSMUSG00000100701	11.2757	0.652117	0.727326	0.896595	0.369935	0.566067
ENSMUSG00000041763	4234.21	-0.180566	0.161108	-1.12078	0.262384	0.453058
ENSMUSG00000047343	17.1078	-1.9424	0.662534	-2.93177	0.00337032	0.0182955
ENSMUSG00000091844	1.55722	-1.72514	2.08677	-0.826702	0.408406	NA
ENSMUSG00000026049	88.9354	0.819375	0.305223	2.68451	0.00726359	0.033026
ENSMUSG00000026047	1385.19	0.174017	0.181902	0.956651	0.338744	0.535163
ENSMUSG00000041684	883.836	-0.39483	0.188611	-2.09336	0.0363169	0.111239
ENSMUSG00000026048	1777.42	0.892141	0.184048	4.84732	1.25e-06	2.42e-05
ENSMUSG00000046828	1.8265	0.473439	1.7181	0.27556	0.782886	NA
ENSMUSG00000056870	3438.33	-1.37278	0.294606	-4.65972	3.17e-06	5.44e-05
ENSMUSG00000102319	38.7352	-2.32459	0.559366	-4.15576	3.24e-05	0.000399258
ENSMUSG00000101701	5.82423	-3.29271	1.3449	-2.44829	0.0143537	0.0554595
ENSMUSG00000103071	3.58517	-2.50542	1.36271	-1.83855	0.0659814	NA
ENSMUSG00000026043	193592	-0.619651	0.233571	-2.65294	0.00797931	0.0356454
ENSMUSG00000026042	39070.3	-0.195313	0.278491	-0.701326	0.4831	0.667482
ENSMUSG00000104476	75.8309	-1.73039	0.65045	-2.6603	0.00780718	0.0350688
ENSMUSG00000025995	3357.37	0.137426	0.182332	0.753712	0.451022	0.639431
ENSMUSG00000084817	27.5237	0.321104	0.47401	0.67742	0.498139	0.680131
ENSMUSG00000099381	5.13995	1.54605	1.25908	1.22792	0.219477	0.402417
ENSMUSG00000025993	1518.45	1.47062	0.303724	4.84195	1.29e-06	2.47e-05
ENSMUSG00000041144	2.84779	-1.12324	1.48436	-0.75672	0.449218	NA
ENSMUSG00000101262	7.72204	0.244578	0.946989	0.258269	0.796199	0.887277
ENSMUSG00000101337	3.61432	-1.27473	1.19126	-1.07007	0.284588	NA
ENSMUSG00000025986	779.327	0.291571	0.190675	1.52915	0.126227	0.274382
ENSMUSG00000100213	15.1085	-0.789125	0.688924	-1.14545	0.252025	0.441508
ENSMUSG00000081185	2.06052	-1.48914	1.66429	-0.894759	0.370916	NA
ENSMUSG00000100033	5.67516	0.22745	0.914612	0.248684	0.803605	0.891823
ENSMUSG00000100816	1.90578	1.56938	1.74989	0.896842	0.369803	NA
ENSMUSG00000026109	357.656	-1.39073	0.21308	-6.52682	6.72e-11	3.54e-09
ENSMUSG00000099924	2.07473	-0.940071	1.629	-0.577085	0.563882	NA
ENSMUSG00000099625	1.78451	-3.0773	2.40705	-1.27845	0.20109	NA
ENSMUSG00000101799	13.0542	-0.38275	0.706759	-0.541556	0.588125	0.748591
ENSMUSG00000045954	7936.9	0.0589505	0.322995	0.182512	0.855181	0.922574
ENSMUSG00000026107	1359.7	0.0193904	0.326713	0.0593499	0.952673	0.975252
ENSMUSG00000018417	774.392	1.43989	0.32401	4.44397	8.83e-06	0.00013193
ENSMUSG00000072324	22.0419	0.534764	0.626407	0.8537	0.393271	0.587918
ENSMUSG00000101628	1.99081	-0.809438	1.57426	-0.514171	0.607132	NA
ENSMUSG00000026104	211.873	-0.944643	0.243416	-3.88078	0.000104121	0.00108004
ENSMUSG00000099569	1.7469	0.0237683	1.74182	0.0136457	0.989113	NA
ENSMUSG00000026103	3325.44	0.15356	0.172435	0.890537	0.373177	0.568913
ENSMUSG00000002881	2325.39	0.173861	0.183083	0.949629	0.342301	0.538891
ENSMUSG00000100007	1.98196	0.684909	1.7265	0.396705	0.691585	NA
ENSMUSG00000043015	118.807	0.994719	0.265533	3.74612	0.000179588	0.00169062
ENSMUSG00000041439	20.9895	0.687424	0.619683	1.10932	0.267294	0.458441
ENSMUSG00000026102	446.081	-0.929258	0.271908	-3.41754	0.000631898	0.00473232
ENSMUSG00000041426	1510.36	0.185365	0.201466	0.920082	0.35753	0.553744
ENSMUSG00000043629	6.14638	-3.38694	1.18314	-2.86268	0.00420079	0.0217214
ENSMUSG00000026100	30.1541	1.35461	1.71763	0.788651	0.430316	0.621406
ENSMUSG00000026098	351.123	-0.493981	0.196755	-2.51063	0.0120514	0.0485487
ENSMUSG00000026097	229.781	-0.423248	0.270745	-1.56327	0.117989	0.26207
ENSMUSG00000026096	498.555	0.00101734	0.186609	0.00545173	0.99565	0.99772
ENSMUSG00000099913	2.24026	-1.69584	1.62805	-1.04164	0.297578	NA
ENSMUSG00000026095	327.047	0.292441	0.24864	1.17616	0.23953	0.426256
ENSMUSG00000096141	1.98627	1.2601	1.63644	0.770024	0.441286	NA
ENSMUSG00000026094	9325.39	-0.804918	0.210493	-3.82396	0.000131326	0.00130676
ENSMUSG00000102405	1.66564	1.48975	1.80118	0.827098	0.408181	NA
ENSMUSG00000042807	1064.9	-1.54235	0.408986	-3.77116	0.000162494	0.00156237
ENSMUSG00000102868	1.74847	-3.02002	2.0525	-1.47138	0.141188	NA
ENSMUSG00000025983	8.19107	-0.903765	0.892172	-1.01299	0.311063	0.506214
ENSMUSG00000041303	2255.29	-0.181985	0.151904	-1.19802	0.230908	0.415975
ENSMUSG00000073678	812.736	-0.416877	0.239848	-1.73809	0.0821955	0.202675
ENSMUSG00000052331	1018.75	-0.619467	0.27079	-2.28763	0.0221589	0.077479
ENSMUSG00000101674	8.46172	-0.998931	1.00017	-0.998762	0.31791	0.513344
ENSMUSG00000102503	10.1025	-1.47321	0.770352	-1.91239	0.0558261	0.152939
ENSMUSG00000089245	1.68949	-2.96621	2.43208	-1.21962	0.222609	NA
ENSMUSG00000102642	16.1697	-1.63746	0.765507	-2.13905	0.0324318	0.102465
ENSMUSG00000025982	12630.5	-0.235113	0.151864	-1.54818	0.121579	0.267233
ENSMUSG00000103030	10.665	-0.786428	0.749351	-1.04948	0.293958	0.487839
ENSMUSG00000025981	1185.28	0.227563	0.172173	1.32171	0.186265	0.358802
ENSMUSG00000101122	36.8627	-0.0415367	0.410784	-0.101116	0.919458	0.959042
ENSMUSG00000025980	14059	0.149577	0.180185	0.830133	0.406464	0.599514
ENSMUSG00000073676	5758.19	0.301203	0.200688	1.50085	0.133394	0.285356
ENSMUSG00000025979	3498.19	-0.0788444	0.195889	-0.402495	0.68732	0.817429
ENSMUSG00000025978	2568.45	1.12626	0.169455	6.64636	3e-11	1.7e-09
ENSMUSG00000097649	241.763	0.46088	0.215299	2.14065	0.0323025	0.102189
ENSMUSG00000046994	859.631	0.601777	0.222756	2.70151	0.0069026	0.0317646
ENSMUSG00000025977	2.52517	0.417149	1.77903	0.234481	0.814612	NA
ENSMUSG00000100215	280.182	0.478138	0.291877	1.63815	0.101391	0.234777
ENSMUSG00000038349	287.313	0.218671	0.488315	0.447807	0.654293	0.796901
ENSMUSG00000102145	3.99792	-1.18581	1.26745	-0.935586	0.349486	0.546032
ENSMUSG00000038331	102.78	-0.554548	0.321896	-1.72275	0.0849333	0.207052
ENSMUSG00000087022	28.9125	-0.868814	0.464041	-1.87228	0.061168	0.163023
ENSMUSG00000097519	9.28094	-0.552481	0.828044	-0.667212	0.504637	0.685227
ENSMUSG00000038323	654.506	-0.822236	0.178559	-4.60485	4.13e-06	6.83e-05
ENSMUSG00000048495	356.098	-0.42591	0.220022	-1.93576	0.0528974	0.146676
ENSMUSG00000025971	552.141	0.0675202	0.179576	0.375997	0.706919	0.830826
ENSMUSG00000038305	221.51	2.0342	0.335612	6.06115	1.35e-09	5.45e-08
ENSMUSG00000054770	538.314	-0.476488	0.231911	-2.05462	0.0399157	0.119322
ENSMUSG00000026039	121.771	-0.418726	0.321019	-1.30436	0.192109	0.366785
ENSMUSG00000063558	495.564	-0.893145	0.240321	-3.71647	0.000202028	0.0018609
ENSMUSG00000064294	4.01418	-0.830415	1.11418	-0.745314	0.456082	0.643822
ENSMUSG00000038242	2.04793	2.49888	1.79978	1.38844	0.165005	NA
ENSMUSG00000079554	2.85075	-1.08687	1.4995	-0.724822	0.468561	NA
ENSMUSG00000103839	25.9675	-2.76779	0.665244	-4.16056	3.17e-05	0.000392077
ENSMUSG00000051223	6666.9	-0.279434	0.14749	-1.8946	0.0581457	0.157292
ENSMUSG00000026034	4054.52	0.438557	0.207868	2.10979	0.0348767	0.108073
ENSMUSG00000026035	786.174	-0.211782	0.188499	-1.12352	0.261218	0.451645
ENSMUSG00000026036	1348.78	-0.310667	0.164286	-1.89101	0.058623	0.158212
ENSMUSG00000026037	1456.13	-0.169543	0.15358	-1.10394	0.269619	0.46063
ENSMUSG00000085054	13.9986	-0.47159	0.759849	-0.620637	0.534838	0.709455
ENSMUSG00000038174	780.885	0.313282	0.204349	1.53307	0.125259	0.272937
ENSMUSG00000026032	2311.43	0.265059	0.285804	0.927416	0.353711	0.550251
ENSMUSG00000059647	2.93767	-0.387122	1.30975	-0.29557	0.767558	NA
ENSMUSG00000047528	5.46156	-0.049853	0.992033	-0.0502534	0.95992	0.978875
ENSMUSG00000102059	33.3696	-0.700321	0.516139	-1.35685	0.17483	0.344009
ENSMUSG00000026031	2934.32	-0.644884	0.179644	-3.58978	0.000330958	0.00278183
ENSMUSG00000026029	492.27	-0.440135	0.185829	-2.36849	0.0178609	0.0657152
ENSMUSG00000102719	3.00359	-1.27988	1.44836	-0.883678	0.37687	NA
ENSMUSG00000099719	4.90055	0.104943	1.35625	0.0773774	0.938323	0.968093
ENSMUSG00000026028	3173.78	0.347044	0.164591	2.10852	0.0349859	0.108314
ENSMUSG00000026027	723.317	0.591558	0.194497	3.04148	0.00235418	0.0137669
ENSMUSG00000038079	772.299	-0.563	0.175777	-3.20291	0.00136044	0.00886828
ENSMUSG00000097573	9.83457	0.113348	0.749271	0.151278	0.879756	0.937279
ENSMUSG00000079550	3.70534	0.746015	1.13111	0.65954	0.509549	NA
ENSMUSG00000101586	7.41634	-0.51646	0.883749	-0.584397	0.558953	0.726328
ENSMUSG00000026024	1138.47	-0.126139	0.20992	-0.600891	0.547912	0.718553
ENSMUSG00000026023	7.33933	-0.450304	1.06724	-0.421932	0.673075	0.808364
ENSMUSG00000041075	2040.26	0.358958	0.239859	1.49654	0.134514	0.286925
ENSMUSG00000097819	9.65774	0.572324	0.956265	0.598499	0.549507	0.719702
ENSMUSG00000047361	3.69282	-0.14116	1.15439	-0.122282	0.902676	NA
ENSMUSG00000026021	3512.86	-0.11907	0.184936	-0.643844	0.519677	0.697565
ENSMUSG00000103821	19.717	-0.383364	0.66609	-0.575545	0.564923	0.730828
ENSMUSG00000026020	4419.59	-0.490609	0.222489	-2.20509	0.0274475	0.0907051
ENSMUSG00000077345	4.79466	-0.19742	1.25675	-0.157088	0.875176	0.935057
ENSMUSG00000089512	9.93801	-0.739438	0.800509	-0.92371	0.355638	0.552113
ENSMUSG00000089093	3.8263	-1.09626	1.42474	-0.76945	0.441626	NA
ENSMUSG00000067336	4024.15	-0.292962	0.234661	-1.24845	0.211867	0.393271
ENSMUSG00000104052	4.69093	-0.924995	1.06548	-0.868146	0.385314	0.580381
ENSMUSG00000041040	604.936	-0.397504	0.213571	-1.86123	0.0627119	0.166179
ENSMUSG00000103696	5.49128	-1.06248	1.0208	-1.04083	0.297953	0.492796
ENSMUSG00000100901	2.19037	-1.04146	1.80024	-0.578513	0.562918	NA
ENSMUSG00000026018	7.36549	-0.485743	0.915339	-0.53067	0.595647	0.754428
ENSMUSG00000026019	1242.52	-0.218731	0.16025	-1.36494	0.172273	0.340622
ENSMUSG00000026017	506.138	-0.181658	0.207345	-0.876117	0.380966	0.576448
ENSMUSG00000082609	2.12827	-0.411122	1.63845	-0.250921	0.801875	NA
ENSMUSG00000073664	2705.49	-0.27089	0.222279	-1.21869	0.222961	0.406282
ENSMUSG00000049439	1886.52	-0.274105	0.187405	-1.46263	0.143568	0.300195
ENSMUSG00000103822	4.43201	-0.72769	1.26405	-0.57568	0.564831	0.730765
ENSMUSG00000026782	1794.17	-0.104359	0.157292	-0.663474	0.507027	0.687325
ENSMUSG00000026014	649.469	-0.529165	0.217592	-2.43191	0.0150194	0.057525
ENSMUSG00000081562	26.6766	0.398427	0.501594	0.794321	0.427009	0.618609
ENSMUSG00000082160	1.84644	-3.10945	1.97386	-1.57531	0.115184	NA
ENSMUSG00000101188	261.088	-0.0331123	0.235443	-0.140639	0.888156	0.941608
ENSMUSG00000026012	119.991	0.569139	0.551358	1.03225	0.301955	0.496682
ENSMUSG00000081382	65.7273	1.15454	0.414275	2.7869	0.00532151	0.0260442
ENSMUSG00000052062	484.337	2.51611	0.340932	7.38011	1.58e-13	1.35e-11
ENSMUSG00000104402	1.693	0.845123	1.64398	0.51407	0.607203	NA
ENSMUSG00000085019	8.90514	0.1112	1.3041	0.0852697	0.932047	0.965637
ENSMUSG00000025969	10112.5	-0.000463088	0.296294	-0.00156294	0.998753	0.999743
ENSMUSG00000100811	4.37465	-0.557766	1.10005	-0.507038	0.612128	0.765961
ENSMUSG00000103032	14.9748	-0.739151	0.861695	-0.857788	0.39101	0.585696
ENSMUSG00000100426	2.18992	-0.568021	1.6287	-0.348758	0.727271	NA
ENSMUSG00000040865	860.748	-0.868895	0.214271	-4.05513	5.01e-05	0.000576765
ENSMUSG00000084799	48.1718	-0.94568	0.370098	-2.55521	0.0106123	0.0441448
ENSMUSG00000101599	129.647	-0.702011	0.396897	-1.76875	0.0769361	0.193557
ENSMUSG00000025968	7484.04	0.230833	0.228969	1.00814	0.313387	0.508536
ENSMUSG00000025967	20568.2	0.681986	0.251862	2.70777	0.00677364	0.0314077
ENSMUSG00000064612	2.50456	-0.861628	1.64832	-0.522732	0.601161	NA
ENSMUSG00000064602	25.4879	-0.851887	0.488166	-1.74508	0.0809717	0.200553
ENSMUSG00000046856	13.438	-2.55016	0.741049	-3.44128	0.000578967	0.00439363
ENSMUSG00000027520	9.34829	-0.706843	0.811782	-0.87073	0.383902	0.578864
ENSMUSG00000081643	8.40346	-1.21005	0.907267	-1.33373	0.182291	0.353845
ENSMUSG00000025964	132.684	2.07149	0.516748	4.0087	6.11e-05	0.000683472
ENSMUSG00000025963	2.52705	-1.36391	1.48667	-0.917424	0.35892	NA
ENSMUSG00000025962	1087.4	-0.297748	0.194309	-1.53234	0.125438	0.273187
ENSMUSG00000025961	4.19081	-1.89633	1.16405	-1.62909	0.103295	0.23777
ENSMUSG00000025959	341.565	-0.676513	0.206381	-3.27799	0.0010455	0.00715905
ENSMUSG00000086836	2.30333	-0.620723	1.47605	-0.420529	0.674099	NA
ENSMUSG00000025958	3314.67	-0.277356	0.189384	-1.46452	0.143053	0.29961
ENSMUSG00000025956	1236.38	-0.231842	0.190097	-1.21959	0.222619	0.405873
ENSMUSG00000101832	3.0768	-0.426271	1.5782	-0.270099	0.787084	NA
ENSMUSG00000087213	19.7677	-0.355419	0.545169	-0.651942	0.514438	0.693254
ENSMUSG00000070871	518.529	-1.28201	0.18159	-7.05991	1.67e-12	1.16e-10
ENSMUSG00000045005	726.62	0.327442	0.288474	1.13508	0.25634	0.446235
ENSMUSG00000102140	5.49808	0.819987	1.02721	0.798269	0.424715	0.616231
ENSMUSG00000051344	595.461	-0.411628	0.183567	-2.24238	0.0249366	0.0846981
ENSMUSG00000084416	323.069	0.771837	0.261099	2.95611	0.0031155	0.0172573
ENSMUSG00000100774	1.59832	-0.921876	1.82306	-0.505676	0.613084	NA
ENSMUSG00000025950	4168.64	-0.913961	0.268784	-3.40036	0.000672966	0.00499397
ENSMUSG00000025949	2286.83	0.0824345	0.159187	0.517847	0.604565	0.761145
ENSMUSG00000015222	1387.41	-0.659375	0.769083	-0.857352	0.39125	0.585968
ENSMUSG00000055567	3.5388	0.643955	1.14625	0.561794	0.574256	NA
ENSMUSG00000026005	1439.15	0.0872571	0.167854	0.51984	0.603175	0.760015
ENSMUSG00000026004	2937.53	0.12397	0.184128	0.673283	0.500767	0.681976
ENSMUSG00000102559	44.0591	-0.416722	0.536784	-0.77633	0.437554	0.62794
ENSMUSG00000102374	28.8239	-0.691562	0.56144	-1.23177	0.218037	0.400216
ENSMUSG00000102776	26.1826	-0.183245	0.696294	-0.263172	0.792418	0.885127
ENSMUSG00000082057	24.4376	-0.44883	0.625994	-0.716988	0.473382	0.658683
ENSMUSG00000103756	17.2441	-0.258595	0.570421	-0.45334	0.650304	0.795043
ENSMUSG00000103382	56.0217	-0.806365	0.398352	-2.02425	0.0429441	0.125829
ENSMUSG00000103553	5.69972	-2.43124	1.16054	-2.09492	0.036178	0.11098
ENSMUSG00000026003	3692.52	0.577367	0.231756	2.49127	0.0127289	0.0505404
ENSMUSG00000082769	5.89453	1.479	1.11161	1.33051	0.183351	0.355056
ENSMUSG00000089420	2.30853	0.673018	1.44422	0.466007	0.641211	NA
ENSMUSG00000061816	35922.3	2.413	0.803108	3.00457	0.00265953	0.0151942
ENSMUSG00000026000	1801.24	0.43347	0.151665	2.85807	0.00426229	0.0219637
ENSMUSG00000025991	2.67687	-0.668344	1.85643	-0.360016	0.718835	NA
ENSMUSG00000101156	3.56522	-0.597385	1.24234	-0.480853	0.630621	NA
ENSMUSG00000025997	434.52	-0.286595	0.243448	-1.17723	0.239104	0.425718
ENSMUSG00000026196	249.224	-0.193712	0.283898	-0.682331	0.49503	0.677779
ENSMUSG00000050296	14.31	-2.65832	1.01333	-2.62335	0.00870694	0.0380998
ENSMUSG00000026192	4834.31	0.049896	0.1782	0.279999	0.779478	0.877903
ENSMUSG00000026193	114641	-1.08952	0.363474	-2.99753	0.0027218	0.0154673
ENSMUSG00000073652	12.2333	-0.0157767	0.639901	-0.0246549	0.98033	0.989353
ENSMUSG00000100319	2.89968	0.680971	1.52391	0.446858	0.654978	NA
ENSMUSG00000099707	56.2404	-2.60213	0.50325	-5.17065	2.33e-07	5.5e-06
ENSMUSG00000101211	61.476	-3.48323	0.564884	-6.16626	6.99e-10	3e-08
ENSMUSG00000101848	9.41065	-0.0071139	0.784384	-0.00906941	0.992764	0.996083
ENSMUSG00000101496	2.99334	-0.0957553	1.2494	-0.0766409	0.938909	NA
ENSMUSG00000102123	2.57618	-3.62521	1.82431	-1.98717	0.0469038	NA
ENSMUSG00000039395	547.248	1.35502	0.416298	3.25492	0.00113426	0.00766556
ENSMUSG00000094655	46.6961	-0.637254	0.484759	-1.31458	0.188651	0.362002
ENSMUSG00000097131	226.809	0.196874	0.231597	0.850074	0.395284	0.58984
ENSMUSG00000094050	27.4083	-0.656347	0.61559	-1.06621	0.28633	0.479083
ENSMUSG00000093956	38.5695	-0.184688	0.508677	-0.363075	0.716549	0.837235
ENSMUSG00000026189	562.625	0.26209	0.218852	1.19757	0.231086	0.416165
ENSMUSG00000026188	145.761	-1.3687	0.302879	-4.51895	6.21e-06	9.72e-05
ENSMUSG00000026187	3066	-0.701674	0.185916	-3.77414	0.000160558	0.00154636
ENSMUSG00000039354	1457.79	-0.0787307	0.165655	-0.475268	0.634596	0.782607
ENSMUSG00000046330	10322.6	0.48161	0.264713	1.81936	0.0688562	0.178128
ENSMUSG00000039323	5276.87	1.30193	0.395992	3.28777	0.00100984	0.00695662
ENSMUSG00000026185	269756	-0.157922	0.24443	-0.646083	0.518226	0.696125
ENSMUSG00000101968	35.474	0.851641	0.520197	1.63715	0.101599	0.23513
ENSMUSG00000099877	2.12607	-1.51516	1.91653	-0.790575	0.429192	NA
ENSMUSG00000100301	4.50868	3.12404	1.38913	2.24892	0.0245177	0.0836163
ENSMUSG00000101344	6.83182	-1.69372	0.958783	-1.76654	0.0773059	0.194287
ENSMUSG00000055322	4741.3	0.135807	0.159781	0.849957	0.395349	0.589886
ENSMUSG00000061815	3.74235	-1.01671	1.18928	-0.854896	0.392609	NA
ENSMUSG00000006304	12074.9	0.310264	0.146376	2.11963	0.0340369	0.106163
ENSMUSG00000064272	33.8578	-2.11393	0.595622	-3.54912	0.000386527	0.00314303
ENSMUSG00000006299	5348.64	0.154616	0.192119	0.804792	0.42094	0.612781
ENSMUSG00000026179	630.825	0.565716	0.298981	1.89215	0.0584711	0.157877
ENSMUSG00000103013	11.1085	0.344147	0.685841	0.501788	0.615817	0.768928
ENSMUSG00000006301	11342.9	0.0791437	0.308776	0.256314	0.797708	0.888102
ENSMUSG00000103403	1.56022	-1.00483	1.84419	-0.544863	0.585848	NA
ENSMUSG00000073650	1.67249	0.876422	2.02237	0.433363	0.664751	NA
ENSMUSG00000026177	31.3487	-2.24289	0.619399	-3.62108	0.000293374	0.00253192
ENSMUSG00000026176	1443.55	-0.469717	0.190162	-2.47009	0.0135078	0.0529449
ENSMUSG00000065468	13.2695	-0.505966	0.665979	-0.759733	0.447414	0.636584
ENSMUSG00000026175	3.37432	-0.485102	1.23261	-0.393556	0.693909	NA
ENSMUSG00000033364	1385.64	0.0362154	0.169011	0.214279	0.83033	0.907468
ENSMUSG00000103227	11.0551	-1.04673	0.921986	-1.1353	0.256249	0.446167
ENSMUSG00000026174	1750.09	0.0127063	0.154527	0.0822267	0.934466	0.966738
ENSMUSG00000026173	146.537	3.04461	0.382527	7.95921	1.73e-15	1.85e-13
ENSMUSG00000026135	542.592	0.525039	0.210426	2.49513	0.0125913	0.0501437
ENSMUSG00000093155	3.02473	0.556898	1.29273	0.430792	0.66662	NA
ENSMUSG00000026172	1353.37	-0.00749683	0.199672	-0.0375458	0.97005	0.984146
ENSMUSG00000026171	1158.11	0.0946761	0.163317	0.579707	0.562112	0.728814
ENSMUSG00000033276	207.605	-0.185657	0.271019	-0.685032	0.493324	0.676363
ENSMUSG00000033257	1681.75	0.0430443	0.191303	0.225006	0.821975	0.902494
ENSMUSG00000026170	56.0782	0.958414	0.437798	2.18917	0.0285848	0.0934344
ENSMUSG00000006542	2669.69	-0.0221407	0.333491	-0.0663906	0.947067	0.97248
ENSMUSG00000033227	25.0907	1.54237	0.664487	2.32114	0.0202791	0.0723988
ENSMUSG00000026167	789.193	2.53037	1.37336	1.84246	0.0654074	0.171541
ENSMUSG00000006538	2.16462	-1.00812	1.68714	-0.597535	0.550151	NA
ENSMUSG00000026162	77.2147	-0.290906	0.338993	-0.858149	0.39081	0.585546
ENSMUSG00000026205	10.1584	0.836687	0.732865	1.14167	0.253593	0.443256
ENSMUSG00000033159	2348.94	0.139912	0.188964	0.740419	0.459046	0.64652
ENSMUSG00000049339	1818.35	-0.253667	0.181625	-1.39665	0.162518	0.32766
ENSMUSG00000026197	811.012	0.272041	0.202745	1.34179	0.179664	0.350324
ENSMUSG00000026198	72.8724	0.508494	0.344931	1.47419	0.14043	0.295529
ENSMUSG00000033124	1688.08	0.483969	0.249202	1.94208	0.0521276	0.145266
ENSMUSG00000026199	886.624	0.0515903	0.17462	0.295443	0.767655	0.869814
ENSMUSG00000026200	147.805	-1.03443	0.263749	-3.92203	8.78e-05	0.0009294
ENSMUSG00000026201	1416.12	-0.326493	0.204363	-1.59762	0.110129	0.248877
ENSMUSG00000026202	7982.84	-0.310513	0.245384	-1.26542	0.205721	0.385375
ENSMUSG00000096094	17.373	-1.94589	0.630466	-3.08643	0.00202575	0.0122009
ENSMUSG00000026203	2364.75	0.335067	0.209282	1.60103	0.109371	0.247754
ENSMUSG00000026204	13.7268	0.0761407	0.718831	0.105923	0.915643	0.95693
ENSMUSG00000026209	3226.05	0.501322	0.215351	2.32793	0.019916	0.0714778
ENSMUSG00000026208	76808.2	0.368745	0.308163	1.19659	0.231465	0.416668
ENSMUSG00000085653	3.84697	0.144051	1.18175	0.121896	0.902981	NA
ENSMUSG00000026207	2898.24	0.00311027	0.248547	0.0125138	0.990016	0.994376
ENSMUSG00000086053	3.15432	-0.534418	1.40722	-0.379769	0.704117	NA
ENSMUSG00000033021	2485.04	0.135282	0.160467	0.843053	0.399199	0.592992
ENSMUSG00000033007	7.33119	1.53016	1.10314	1.3871	0.165412	0.331542
ENSMUSG00000032997	1729.6	0.0800187	0.266285	0.3005	0.763796	0.8678
ENSMUSG00000026211	9195.11	-0.225622	0.293593	-0.768485	0.442199	0.631529
ENSMUSG00000051703	26.02	-0.654126	0.562813	-1.16224	0.245136	0.433077
ENSMUSG00000032968	64.9565	-0.172793	0.433113	-0.398956	0.689925	0.819461
ENSMUSG00000026213	1304.86	0.357679	0.382559	0.934963	0.349807	0.546334
ENSMUSG00000006576	4201.54	-0.863881	0.387867	-2.22726	0.0259298	0.0872059
ENSMUSG00000026235	354.288	-1.58726	0.346886	-4.57575	4.75e-06	7.72e-05
ENSMUSG00000004872	2.07531	1.73536	1.70857	1.01568	0.309781	NA
ENSMUSG00000032908	14.3076	-0.442883	0.70087	-0.631905	0.527449	0.703307
ENSMUSG00000026245	4271.36	0.422651	0.152463	2.77215	0.00556869	0.0269608
ENSMUSG00000104018	23.8013	-0.17486	0.705546	-0.247837	0.804261	0.892319
ENSMUSG00000012187	2.09921	0.0878666	1.63746	0.0536604	0.957206	NA
ENSMUSG00000099364	136.088	-4.15268	0.586568	-7.07963	1.45e-12	1.02e-10
ENSMUSG00000032883	20138.2	0.582505	0.268853	2.16663	0.0302632	0.0972664
ENSMUSG00000079470	1080.25	-1.47809	0.244259	-6.05132	1.44e-09	5.78e-08
ENSMUSG00000099377	14.3031	-0.859762	0.674859	-1.27399	0.202667	0.381367
ENSMUSG00000047330	17.8416	-0.209789	0.725744	-0.289067	0.77253	0.872709
ENSMUSG00000072978	4.36144	0.195025	1.05311	0.185189	0.853081	0.921383
ENSMUSG00000050711	7.75082	-1.37674	0.855098	-1.61003	0.107391	0.244337
ENSMUSG00000054702	5.23749	-1.63574	1.11711	-1.46425	0.143125	0.299688
ENSMUSG00000073643	1473.04	-0.089171	0.164915	-0.540708	0.588709	0.74919
ENSMUSG00000026248	887.414	0.434416	0.221068	1.96508	0.0494051	0.139474
ENSMUSG00000026249	1216.99	2.45466	0.361052	6.79863	1.06e-11	6.55e-10
ENSMUSG00000067106	4.71119	0.163652	1.03423	0.158235	0.874271	0.934476
ENSMUSG00000096297	5.7453	0.474437	1.11344	0.426102	0.670034	0.806483
ENSMUSG00000043230	7.04296	3.809	1.18437	3.21604	0.00129971	0.00856704
ENSMUSG00000101257	4.58208	1.30003	1.26124	1.03076	0.302653	0.497538
ENSMUSG00000103404	2.68147	1.02487	1.48559	0.689878	0.490271	NA
ENSMUSG00000004364	9794.72	0.816929	0.179938	4.54007	5.62e-06	8.94e-05
ENSMUSG00000103076	54.0441	-0.429592	0.471484	-0.91115	0.362217	0.558625
ENSMUSG00000103525	8.46073	0.104234	0.997081	0.104539	0.916741	0.957434
ENSMUSG00000038608	84.0821	4.74506	0.454994	10.4288	1.83e-25	6.02e-23
ENSMUSG00000055980	2370.27	-0.281872	0.194697	-1.44775	0.147688	0.306489
ENSMUSG00000026142	6754.33	0.48043	0.214169	2.24323	0.024882	0.0845605
ENSMUSG00000104493	12.6924	-1.21441	0.84734	-1.4332	0.1518	0.31246
ENSMUSG00000100786	9.88691	-0.267583	1.13848	-0.235036	0.814181	0.89872
ENSMUSG00000067158	28.2604	0.0991348	0.529253	0.187311	0.851417	0.920409
ENSMUSG00000079465	4.91953	-1.26596	1.12925	-1.12107	0.262258	0.452986
ENSMUSG00000097564	11.7435	-1.54936	0.75245	-2.05909	0.0394855	0.118263
ENSMUSG00000026150	4121.27	0.320064	0.161499	1.98184	0.0474976	0.135543
ENSMUSG00000101450	34.3486	-0.677108	0.651814	-1.0388	0.298896	0.493781
ENSMUSG00000026149	6.07575	-0.537053	1.02816	-0.522344	0.601431	0.758927
ENSMUSG00000026159	2525.51	0.345101	0.154173	2.23841	0.0251946	0.0853881
ENSMUSG00000045658	319.368	-1.10284	0.519454	-2.12308	0.0337468	0.10547
ENSMUSG00000102750	1.63479	-0.241635	2.37931	-0.101556	0.919109	NA
ENSMUSG00000036766	3.43037	-0.749327	1.24518	-0.601784	0.547318	NA
ENSMUSG00000026219	13052.6	-0.167289	0.155945	-1.07275	0.283384	0.475736
ENSMUSG00000103505	6.704	-1.82832	1.18146	-1.54751	0.121741	0.267486
ENSMUSG00000104503	13.9633	-0.754423	0.681345	-1.10725	0.268184	0.459234
ENSMUSG00000073633	242.001	0.693872	0.255512	2.71561	0.0066154	0.0307993
ENSMUSG00000026220	3.62552	-0.347647	1.3268	-0.262019	0.793307	NA
ENSMUSG00000096802	5.6016	0.555958	1.27648	0.435541	0.66317	0.802229
ENSMUSG00000052477	3.02593	-0.158359	1.43812	-0.110115	0.912318	NA
ENSMUSG00000064281	8.84287	0.636971	0.835307	0.762559	0.445726	0.635109
ENSMUSG00000089844	16.3461	0.263324	0.611094	0.430907	0.666536	0.80407
ENSMUSG00000079455	5.89276	-0.796982	1.03591	-0.769355	0.441683	0.630949
ENSMUSG00000070034	6.31775	-1.29736	1.18624	-1.09368	0.274097	0.465564
ENSMUSG00000070031	4.48772	-0.163329	1.08245	-0.150888	0.880064	0.93739
ENSMUSG00000026222	20.101	-1.77586	0.687513	-2.58302	0.0097941	0.0415084
ENSMUSG00000036707	8084.08	0.487471	0.227784	2.14006	0.0323497	0.102281
ENSMUSG00000026223	3620	0.513133	0.176395	2.909	0.00362585	0.0193692
ENSMUSG00000099342	122.713	-0.494174	0.542449	-0.911005	0.362293	0.558692
ENSMUSG00000026227	4.62748	-1.17232	1.34384	-0.872368	0.383007	0.578084
ENSMUSG00000026229	9684.43	-0.19409	0.15397	-1.26057	0.207465	0.387707
ENSMUSG00000077274	2.9162	-1.15838	1.32817	-0.872158	0.383122	NA
ENSMUSG00000026228	641.96	-2.1704	0.242529	-8.94904	3.59e-19	6.26e-17
ENSMUSG00000103272	14.4573	-1.05609	0.806231	-1.30991	0.190226	0.364247
ENSMUSG00000062590	400.937	-0.609243	0.227613	-2.67667	0.00743589	0.0336751
ENSMUSG00000026234	11385.3	-0.233984	0.165319	-1.41535	0.156967	0.319821
ENSMUSG00000064823	2.44622	-0.781105	1.52261	-0.513004	0.607948	NA
ENSMUSG00000073627	54.2921	-0.138093	0.47546	-0.290441	0.771479	0.872011
ENSMUSG00000101328	1.48569	-2.76248	2.38233	-1.15957	0.246223	NA
ENSMUSG00000026238	9783.82	-0.819569	0.24549	-3.3385	0.000842323	0.00599831
ENSMUSG00000026239	1085.05	0.458725	0.227399	2.01727	0.0436673	0.127223
ENSMUSG00000102927	6.33047	-0.375791	1.0327	-0.363892	0.715938	0.836772
ENSMUSG00000026240	544.809	0.00823915	0.192182	0.0428716	0.965804	0.981643
ENSMUSG00000026241	10.3616	-1.09021	0.973537	-1.11985	0.26278	0.453383
ENSMUSG00000053333	1883.68	0.45272	0.198619	2.27934	0.0226471	0.0788157
ENSMUSG00000100768	7.46015	-0.833592	1.03626	-0.804424	0.421152	0.612986
ENSMUSG00000104121	3.53345	-1.91032	1.66168	-1.14963	0.250295	NA
ENSMUSG00000102383	7.42784	-1.1556	1.00857	-1.14578	0.251886	0.441356
ENSMUSG00000104400	3.29545	-1.42209	1.36474	-1.04202	0.297403	NA
ENSMUSG00000102293	2.43871	0.459676	1.57752	0.291391	0.770753	NA
ENSMUSG00000102649	4.39213	-1.31991	1.12615	-1.17206	0.241173	0.428199
ENSMUSG00000084106	170.615	0.628618	0.259272	2.42456	0.0153271	0.0584419
ENSMUSG00000102571	2.03194	-1.46609	1.75719	-0.834336	0.404092	NA
ENSMUSG00000099401	4.85889	0.513032	1.06408	0.482139	0.629707	0.779219
ENSMUSG00000103984	8.6423	-1.98466	0.916673	-2.16507	0.030382	0.0976116
ENSMUSG00000101940	5.40509	0.676562	1.28925	0.524771	0.599743	0.757931
ENSMUSG00000079440	1.83239	-1.25112	1.68143	-0.744081	0.456827	NA
ENSMUSG00000099839	5.61452	-1.16942	1.23549	-0.94652	0.343883	0.540736
ENSMUSG00000026247	5.8048	-0.175904	1.08271	-0.162467	0.870938	0.93307
ENSMUSG00000036480	3.47826	-0.774251	1.23809	-0.625357	0.531737	NA
ENSMUSG00000026251	6287.6	0.184603	0.297454	0.62061	0.534856	0.709455
ENSMUSG00000026253	15011.1	-0.257011	0.324901	-0.791043	0.428919	0.619964
ENSMUSG00000026254	6365.77	0.0468866	0.201001	0.233266	0.815555	0.899472
ENSMUSG00000026255	119.999	0.383154	0.437095	0.876592	0.380708	0.576285
ENSMUSG00000048000	4446.9	-0.0756498	0.149178	-0.507113	0.612076	0.765961
ENSMUSG00000095281	2.01442	-0.278508	1.68717	-0.165074	0.868886	NA
ENSMUSG00000079436	6.32815	0.719453	0.965459	0.745192	0.456156	0.643822
ENSMUSG00000089613	3.25757	0.254957	1.47545	0.172799	0.86281	NA
ENSMUSG00000026259	229.319	-1.21147	0.304023	-3.98481	6.75e-05	0.000742863
ENSMUSG00000079434	73.1383	1.29175	0.566186	2.2815	0.0225188	0.0784809
ENSMUSG00000026288	9.57283	-0.378515	0.742072	-0.510079	0.609996	0.764657
ENSMUSG00000026289	1485.05	0.159299	0.176809	0.900968	0.367606	0.563734
ENSMUSG00000087968	299.096	-0.605918	0.260825	-2.32309	0.0201745	0.0721324
ENSMUSG00000089281	232.555	-0.435348	0.307018	-1.41799	0.156193	0.318817
ENSMUSG00000056055	12.6151	1.00072	0.66937	1.49502	0.134909	0.287594
ENSMUSG00000070738	4074.32	1.12873	0.218255	5.17161	2.32e-07	5.48e-06
ENSMUSG00000101942	3.3225	0.0108618	1.58941	0.00683384	0.994547	NA
ENSMUSG00000103996	1.71773	-1.86448	2.0452	-0.911638	0.361959	NA
ENSMUSG00000103591	6.69266	0.232603	0.88435	0.263022	0.792534	0.885127
ENSMUSG00000005501	2013.37	-0.758302	0.158855	-4.77355	1.81e-06	3.32e-05
ENSMUSG00000090124	3.77717	-4.23272	1.63831	-2.58359	0.00977782	NA
ENSMUSG00000090145	3.60812	-4.15033	1.65011	-2.51519	0.0118969	NA
ENSMUSG00000054545	10.4523	-0.691506	0.811927	-0.851685	0.394389	0.589018
ENSMUSG00000079429	47.4935	-0.102371	0.389356	-0.262924	0.792609	0.885133
ENSMUSG00000044783	2366.83	-0.343335	0.154374	-2.22406	0.0261447	0.0876842
ENSMUSG00000026295	2.32372	4.78274	1.93252	2.47488	0.0133282	NA
ENSMUSG00000062310	167.864	-0.746709	0.446754	-1.67141	0.0946411	0.223627
ENSMUSG00000100798	10.0432	-0.754504	0.780939	-0.96615	0.333969	0.530629
ENSMUSG00000049866	1933.46	0.659908	0.23346	2.82664	0.00470388	0.0236778
ENSMUSG00000036206	1720.09	-0.170974	0.245249	-0.697143	0.485713	0.669947
ENSMUSG00000102700	6.23989	-2.98807	1.31253	-2.27658	0.0228115	0.0792772
ENSMUSG00000055013	5373.86	0.794291	0.223597	3.55233	0.000381834	0.00311013
ENSMUSG00000104114	8.55873	0.0621583	0.943858	0.0658556	0.947493	0.9726
ENSMUSG00000101662	3.63522	1.25661	1.21361	1.03544	0.300464	NA
ENSMUSG00000102009	33.3151	-0.756441	0.755927	-1.00068	0.316982	0.512183
ENSMUSG00000088775	2.26282	1.43539	1.72588	0.831684	0.405587	NA
ENSMUSG00000103252	5.37685	-0.183883	1.06472	-0.172705	0.862883	0.927694
ENSMUSG00000026301	4.00028	1.14042	1.32588	0.860125	0.38972	0.584751
ENSMUSG00000044337	1032.84	-0.961073	0.228729	-4.2018	2.65e-05	0.000337506
ENSMUSG00000101028	5.82048	-0.749727	0.953211	-0.786528	0.431558	0.622464
ENSMUSG00000034432	2096.65	1.36e-05	0.166162	8.18e-05	0.999935	0.999974
ENSMUSG00000056128	1.72707	-1.26135	1.98276	-0.636158	0.524673	NA
ENSMUSG00000048126	26770.5	-0.97509	0.344447	-2.83088	0.00464196	0.0234705
ENSMUSG00000103061	19.6842	-1.54908	0.649857	-2.38372	0.0171386	0.0636188
ENSMUSG00000026305	5826.02	0.625769	0.145469	4.30174	1.69e-05	0.000232632
ENSMUSG00000034353	8.00434	3.17687	1.15139	2.75917	0.00579484	0.0278429
ENSMUSG00000034343	2561.28	0.711627	0.193291	3.68164	0.000231734	0.00209172
ENSMUSG00000083064	40.8079	-0.888582	0.448671	-1.98048	0.0476501	0.135842
ENSMUSG00000097285	11.0817	-0.24599	0.737471	-0.333559	0.738712	0.851002
ENSMUSG00000026307	581.966	0.279209	0.212465	1.31414	0.188798	0.362112
ENSMUSG00000090322	7.02478	0.179191	0.887934	0.201807	0.840068	0.913537
ENSMUSG00000049515	6.08898	-0.518621	1.08136	-0.479602	0.63151	0.780371
ENSMUSG00000026308	3223.68	0.423246	0.332888	1.27144	0.203573	0.382607
ENSMUSG00000047443	442.356	-0.168073	0.288086	-0.583411	0.559616	0.726877
ENSMUSG00000026309	2402.23	-0.0407432	0.156393	-0.260518	0.794464	0.886337
ENSMUSG00000067071	3731.22	0.140405	0.229061	0.612961	0.539902	0.713405
ENSMUSG00000055866	570.386	-0.828387	0.218288	-3.79492	0.000147691	0.0014411
ENSMUSG00000034292	425.091	-0.135822	0.193237	-0.702879	0.482131	0.666529
ENSMUSG00000026311	820.731	0.36553	0.16099	2.27052	0.023176	0.0802806
ENSMUSG00000100980	11.7225	0.420009	0.725332	0.579058	0.56255	0.729026
ENSMUSG00000007805	28.5651	-0.87228	0.55356	-1.57576	0.11508	0.257246
ENSMUSG00000101414	1.54434	-1.7121	2.0653	-0.828984	0.407113	NA
ENSMUSG00000026313	2496.57	0.0143889	0.186522	0.077143	0.93851	0.968227
ENSMUSG00000103101	41.2756	-0.327445	0.539619	-0.606808	0.543978	0.716411
ENSMUSG00000102565	7.67203	-0.673504	1.17854	-0.571473	0.567679	0.733229
ENSMUSG00000026260	7369.6	0.428532	0.215324	1.99018	0.0465716	0.133569
ENSMUSG00000073616	971.232	-0.064509	0.239801	-0.269011	0.787921	0.88248
ENSMUSG00000044055	3.75324	0.703891	1.19301	0.590013	0.555182	NA
ENSMUSG00000100546	12.6324	-3.44002	1.08172	-3.18015	0.00147201	0.00945503
ENSMUSG00000099665	2.79923	-2.77655	1.58013	-1.75717	0.078889	NA
ENSMUSG00000100781	13.458	-0.35978	0.815228	-0.441325	0.658978	0.799651
ENSMUSG00000034220	58674	0.315066	0.278961	1.12943	0.258718	0.448684
ENSMUSG00000101995	60.201	-0.626551	0.484755	-1.29251	0.196181	0.372398
ENSMUSG00000034212	25.74	-1.1249	0.707718	-1.58948	0.111953	0.251902
ENSMUSG00000047067	390.839	0.192428	0.359621	0.535085	0.592591	0.752227
ENSMUSG00000097251	37.071	-0.68881	0.4669	-1.47528	0.140136	0.295128
ENSMUSG00000026269	826.168	-0.278946	0.181845	-1.53398	0.125036	0.272611
ENSMUSG00000100632	23.5219	-0.220042	0.504545	-0.436119	0.66275	0.80198
ENSMUSG00000026270	311.95	-0.180488	0.218861	-0.824671	0.409558	0.602209
ENSMUSG00000026271	8.55186	-4.52215	1.36134	-3.32183	0.000894291	0.00629759
ENSMUSG00000014602	72.824	0.284544	0.392164	0.725573	0.4681	0.653461
ENSMUSG00000084989	47.7192	-7.03505	1.7282	-4.07073	4.69e-05	0.000545711
ENSMUSG00000047793	857.045	-4.96087	0.836651	-5.92944	3.04e-09	1.16e-07
ENSMUSG00000026273	987.987	0.202759	0.208628	0.971871	0.331115	0.527544
ENSMUSG00000101172	2.69062	-1.09035	1.48491	-0.734285	0.462775	NA
ENSMUSG00000026274	137.516	-0.957334	0.353292	-2.70975	0.00673337	0.0312379
ENSMUSG00000026275	1185.98	-0.314869	0.164835	-1.9102	0.0561068	0.153308
ENSMUSG00000034107	2.4132	-3.5407	1.85119	-1.91266	0.0557911	NA
ENSMUSG00000034088	22939.6	0.190305	0.189431	1.00461	0.315083	0.51032
ENSMUSG00000090489	25.7761	0.451414	0.672751	0.670997	0.502222	0.683468
ENSMUSG00000026276	22538.9	0.0546944	0.161656	0.338339	0.735107	0.848449
ENSMUSG00000034066	276.375	-0.263421	0.215986	-1.21962	0.222609	0.405873
ENSMUSG00000103854	4.38604	-1.62804	1.10238	-1.47684	0.139718	0.2945
ENSMUSG00000026277	5705.39	0.396337	0.183458	2.16037	0.0307439	0.0984784
ENSMUSG00000026278	306.535	-0.568357	0.245835	-2.31194	0.0207809	0.073731
ENSMUSG00000026279	549.99	0.353878	0.222017	1.59392	0.110954	0.250379
ENSMUSG00000026280	1259.06	-0.178248	0.166133	-1.07293	0.283305	0.475675
ENSMUSG00000026281	860.271	-0.114112	0.180819	-0.631086	0.527985	0.703765
ENSMUSG00000026283	416.882	-0.452836	0.186125	-2.43297	0.0149755	0.0574469
ENSMUSG00000073609	162.01	0.195954	0.281115	0.69706	0.485765	0.669947
ENSMUSG00000093805	5.79958	-0.214001	0.959788	-0.222967	0.823561	0.903245
ENSMUSG00000099624	1.77261	0.0262979	1.94165	0.0135441	0.989194	NA
ENSMUSG00000100347	40.0982	0.763209	0.439841	1.73519	0.0827063	0.203567
ENSMUSG00000051185	865.609	0.393527	0.246444	1.59682	0.110306	0.249146
ENSMUSG00000103973	11.9762	0.0308879	0.769048	0.0401639	0.967962	0.982744
ENSMUSG00000081051	637.375	1.24481	0.243435	5.11349	3.16e-07	7.16e-06
ENSMUSG00000040710	16.2631	1.34219	0.958464	1.40036	0.161407	0.326074
ENSMUSG00000095955	13.1117	-0.681315	0.794937	-0.857068	0.391407	0.586109
ENSMUSG00000100454	2.09058	-0.920419	1.52189	-0.604787	0.54532	NA
ENSMUSG00000044757	3.34999	0.52157	1.20116	0.434221	0.664128	NA
ENSMUSG00000044768	654.757	0.129842	0.183729	0.7067	0.479753	0.664624
ENSMUSG00000040648	1594.23	-0.479548	0.218789	-2.19182	0.0283922	0.092914
ENSMUSG00000026333	356.834	-0.50487	0.202223	-2.4966	0.0125389	0.0499651
ENSMUSG00000026335	8565.41	-0.848373	0.191531	-4.42943	9.45e-06	0.000139924
ENSMUSG00000104140	5.42802	-1.22418	1.16601	-1.04989	0.293769	0.487619
ENSMUSG00000089782	115.76	0.414897	0.268904	1.54292	0.122851	0.269095
ENSMUSG00000089706	18.6851	-1.82172	0.692532	-2.63052	0.00852537	0.0374193
ENSMUSG00000089791	10.6688	-0.240297	0.743191	-0.323331	0.746445	0.855273
ENSMUSG00000100009	157.377	0.524732	0.321172	1.6338	0.1023	0.236022
ENSMUSG00000099686	14.0071	0.192199	0.730348	0.263161	0.792426	0.885127
ENSMUSG00000082431	59.7201	-1.38423	0.408867	-3.38553	0.00071042	0.00521564
ENSMUSG00000099835	4.20633	-0.701912	1.08044	-0.649651	0.515918	0.694536
ENSMUSG00000099375	11.4876	-0.648933	1.05174	-0.61701	0.537228	0.711631
ENSMUSG00000047496	8.97307	-0.531515	0.957789	-0.55494	0.578936	0.742173
ENSMUSG00000067017	963.367	-0.0191545	0.209869	-0.091269	0.927279	0.962796
ENSMUSG00000056536	2588.2	-0.539231	0.163231	-3.30349	0.00095491	0.00662358
ENSMUSG00000100672	9.92703	1.15549	0.809097	1.42813	0.153255	0.314474
ENSMUSG00000026319	1680.3	-0.313156	0.171544	-1.82551	0.0679241	0.176517
ENSMUSG00000104044	12.1747	-1.22622	0.813523	-1.5073	0.131734	0.282794
ENSMUSG00000101330	5.67855	0.338124	0.986426	0.342777	0.731766	0.846557
ENSMUSG00000099843	45.845	0.19272	0.401746	0.479706	0.631436	0.780371
ENSMUSG00000038866	800.337	0.155014	0.186405	0.831595	0.405638	0.598863
ENSMUSG00000044340	991.252	0.605765	0.164633	3.67949	0.000233704	0.00210395
ENSMUSG00000103291	9.08191	-0.538219	1.06693	-0.504455	0.613942	0.767207
ENSMUSG00000100247	3.5878	-1.95544	1.4024	-1.39435	0.163212	NA
ENSMUSG00000057329	262.116	-0.512497	0.396491	-1.29258	0.196156	0.372392
ENSMUSG00000009905	771.163	-0.745716	0.178974	-4.16661	3.09e-05	0.000384314
ENSMUSG00000009907	2786.74	-0.313495	0.150747	-2.07961	0.0375616	0.113917
ENSMUSG00000067001	13.2805	-1.5945	1.11121	-1.43493	0.151308	0.311823
ENSMUSG00000062345	15.492	1.00712	1.05547	0.954182	0.339991	0.53644
ENSMUSG00000026315	168.826	0.748224	0.242747	3.08232	0.00205394	0.0123446
ENSMUSG00000026312	1.6968	0.155602	1.77355	0.087735	0.930087	NA
ENSMUSG00000102728	1.64324	-1.01389	1.82056	-0.556911	0.577588	NA
ENSMUSG00000038702	958.854	-0.497122	0.190635	-2.60772	0.00911476	0.039331
ENSMUSG00000070695	16.9233	3.15224	0.744149	4.23604	2.27e-05	0.000298418
ENSMUSG00000102030	1.69476	0.902081	2.07562	0.434609	0.663846	NA
ENSMUSG00000026374	2318.31	-0.458378	0.160437	-2.85706	0.00427585	0.0220031
ENSMUSG00000026377	2769.93	-0.521783	0.168594	-3.09491	0.00196872	0.0119457
ENSMUSG00000064302	4895.03	-0.180149	0.211876	-0.850258	0.395182	0.58979
ENSMUSG00000080542	13.6419	-0.348975	0.654476	-0.533213	0.593886	0.753203
ENSMUSG00000026380	52.3677	0.955293	0.700212	1.36429	0.172476	0.340788
ENSMUSG00000048402	8.81577	-0.998332	1.0588	-0.942887	0.345739	0.542656
ENSMUSG00000037035	754.743	0.719235	0.329803	2.1808	0.029198	0.0948767
ENSMUSG00000004451	2063.53	0.00473871	0.244781	0.0193589	0.984555	0.991569
ENSMUSG00000098923	6.92131	-1.00194	1.04866	-0.955451	0.339349	0.535922
ENSMUSG00000101731	4.5795	0.291067	1.31038	0.222124	0.824217	0.903559
ENSMUSG00000026383	457.563	0.12526	0.23119	0.541807	0.587952	0.748591
ENSMUSG00000026384	1538.76	-0.517999	0.248569	-2.08392	0.0371671	0.113061
ENSMUSG00000103146	18.3437	-0.753431	0.709972	-1.06121	0.288593	0.481646
ENSMUSG00000101224	1.80391	1.04791	1.7605	0.595235	0.551686	NA
ENSMUSG00000036975	735.615	0.654115	0.234199	2.79299	0.0052223	0.0256355
ENSMUSG00000026387	108.835	0.947936	0.433049	2.18898	0.0285984	0.0934612
ENSMUSG00000050777	2559.9	1.49339	0.249461	5.98645	2.14e-09	8.37e-08
ENSMUSG00000026385	5365.62	-0.138913	0.289999	-0.479013	0.631929	0.780557
ENSMUSG00000026388	116.56	-0.118381	0.283204	-0.418007	0.675942	0.810458
ENSMUSG00000026389	2223.83	1.03192	0.396789	2.60068	0.00930385	0.0398553
ENSMUSG00000058665	588.56	0.22499	0.206273	1.09074	0.275389	0.466848
ENSMUSG00000104332	2.46387	-0.764852	1.65726	-0.461515	0.644429	NA
ENSMUSG00000003721	1358.48	-0.25974	0.215212	-1.2069	0.22747	0.411646
ENSMUSG00000104253	60.3992	-0.756257	0.396996	-1.90495	0.0567864	0.154494
ENSMUSG00000101791	3.2324	-2.40352	1.55281	-1.54785	0.121658	NA
ENSMUSG00000026339	1743.31	-0.0464538	0.167833	-0.276787	0.781944	0.879192
ENSMUSG00000085857	5.04566	0.850271	1.01296	0.839394	0.401248	0.594626
ENSMUSG00000001674	1042.06	-0.29633	0.170123	-1.74186	0.0815337	0.201653
ENSMUSG00000100405	10.9949	-0.145586	0.714931	-0.203637	0.838637	0.912757
ENSMUSG00000026341	11505.5	-0.020989	0.166486	-0.126071	0.899676	0.94819
ENSMUSG00000026342	1606.79	0.184585	0.234783	0.786193	0.431755	0.622497
ENSMUSG00000026343	48.6181	-0.0200083	0.629018	-0.0318087	0.974625	0.986371
ENSMUSG00000049690	35.2388	0.848187	0.560935	1.51209	0.13051	0.280935
ENSMUSG00000036155	462.567	-1.38575	0.241196	-5.74534	9.17e-09	3.1e-07
ENSMUSG00000104378	2.32085	-1.72329	1.68851	-1.02059	0.307447	NA
ENSMUSG00000099471	66.1115	0.721067	0.384949	1.87315	0.0610478	0.162753
ENSMUSG00000026348	3.86223	-1.05908	1.20774	-0.876912	0.380534	NA
ENSMUSG00000102014	4.6485	1.98795	1.13548	1.75076	0.079987	0.199008
ENSMUSG00000026349	2725	0.401186	0.173905	2.30693	0.0210587	0.0743772
ENSMUSG00000051590	54.1347	-2.43536	0.528965	-4.60401	4.14e-06	6.84e-05
ENSMUSG00000036104	3290.61	0.00613555	0.203461	0.0301559	0.975943	0.987123
ENSMUSG00000036086	222.03	-0.786069	0.26442	-2.9728	0.00295096	0.0165117
ENSMUSG00000099760	1.81232	-1.32489	1.96387	-0.674632	0.499909	NA
ENSMUSG00000104164	6.17929	-1.08133	1.02436	-1.05561	0.291147	0.484018
ENSMUSG00000058603	45.2807	1.24138	0.434629	2.85617	0.0042878	0.0220514
ENSMUSG00000103999	2.20014	-1.11853	1.64032	-0.681901	0.495302	NA
ENSMUSG00000056211	1647.81	0.153602	0.234938	0.653801	0.51324	0.692129
ENSMUSG00000101535	1.58415	-1.01199	1.79357	-0.564231	0.572597	NA
ENSMUSG00000104239	6.22947	-0.203882	0.917353	-0.22225	0.824119	0.903549
ENSMUSG00000102179	5.61377	-1.29204	1.20231	-1.07463	0.282541	0.474788
ENSMUSG00000103497	11.4996	-1.02544	1.03746	-0.988414	0.32295	0.51835
ENSMUSG00000026353	10951	0.194571	0.206086	0.944125	0.345106	0.542031
ENSMUSG00000026354	2.14069	0.442526	1.83542	0.241103	0.809475	NA
ENSMUSG00000026355	2363.75	-0.527906	0.233127	-2.26446	0.0235461	0.0812498
ENSMUSG00000026356	9938.63	0.133849	0.184082	0.727119	0.467153	0.652458
ENSMUSG00000100078	28.4859	0.665341	0.513237	1.29636	0.19485	0.370639
ENSMUSG00000045382	1854.34	-1.64301	0.234336	-7.01133	2.36e-12	1.62e-10
ENSMUSG00000042581	209.772	1.96099	0.535572	3.66148	0.000250761	0.00223167
ENSMUSG00000089648	3.14438	-1.00853	1.29176	-0.780743	0.434954	NA
ENSMUSG00000102800	2.05809	-0.377157	1.68751	-0.223499	0.823147	NA
ENSMUSG00000087691	6.41132	1.66156	1.17155	1.41826	0.156115	0.318732
ENSMUSG00000086825	10.371	1.60343	0.732326	2.1895	0.0285606	0.0933734
ENSMUSG00000026399	741.319	0.832105	0.307372	2.70716	0.00678619	0.0314404
ENSMUSG00000026409	186.202	0.106569	0.242889	0.438758	0.660837	0.801147
ENSMUSG00000046404	537.902	-0.466708	0.209503	-2.2277	0.0259008	0.0871428
ENSMUSG00000104515	9.82623	0.409457	0.789162	0.518851	0.603864	0.760555
ENSMUSG00000042510	200.289	2.10396	0.236876	8.88211	6.56e-19	1.11e-16
ENSMUSG00000099556	1.79656	-0.00642097	1.72419	-0.00372405	0.997029	NA
ENSMUSG00000016524	2.24145	2.02907	1.63303	1.24252	0.214045	NA
ENSMUSG00000016528	5215.59	1.21943	0.21726	5.61279	1.99e-08	6.25e-07
ENSMUSG00000102856	46.1456	-0.45326	0.52306	-0.866553	0.386187	0.581321
ENSMUSG00000016526	151.632	0.89723	0.33204	2.70218	0.00688875	0.0317264
ENSMUSG00000026427	1204.51	-0.00501869	0.183623	-0.0273316	0.978195	0.988307
ENSMUSG00000026430	408.11	0.499234	0.402723	1.23964	0.215107	0.397043
ENSMUSG00000101729	2.56293	0.906644	2.17195	0.417433	0.676362	NA
ENSMUSG00000042349	141.728	-0.872747	0.29511	-2.95736	0.00310288	0.0171985
ENSMUSG00000102055	3.7698	-0.620582	1.33014	-0.466554	0.640819	NA
ENSMUSG00000026425	1681.47	0.364378	0.206663	1.76315	0.0778755	0.195288
ENSMUSG00000102733	6.33743	-0.147563	1.04567	-0.141119	0.887776	0.941497
ENSMUSG00000104060	3.85857	-0.473922	1.52407	-0.310959	0.755832	NA
ENSMUSG00000101778	9.53665	-1.93609	0.862857	-2.24381	0.0248446	0.0845346
ENSMUSG00000055184	55.1995	-0.300536	0.391291	-0.768063	0.44245	0.631666
ENSMUSG00000052688	291.663	-0.709076	0.328392	-2.15923	0.030832	0.098705
ENSMUSG00000042251	3.31149	0.31733	1.45845	0.21758	0.827756	NA
ENSMUSG00000013275	1818.72	1.05571	0.22767	4.63702	3.53e-06	5.98e-05
ENSMUSG00000026433	39.6751	-0.756626	0.531565	-1.42339	0.154622	0.316554
ENSMUSG00000026434	6961.15	-0.198936	0.157622	-1.2621	0.206911	0.386884
ENSMUSG00000103569	30.8153	-1.35327	0.556376	-2.4323	0.0150033	0.0574889
ENSMUSG00000026435	23.0528	-0.00129695	0.490225	-0.00264563	0.997889	0.999233
ENSMUSG00000026436	1398.83	-0.5323	0.171441	-3.10486	0.00190369	0.0116439
ENSMUSG00000059149	629.816	-0.548343	0.183352	-2.99067	0.00278371	0.0157458
ENSMUSG00000103966	46.3813	0.195554	0.572797	0.341402	0.732801	0.847025
ENSMUSG00000026437	1064.07	-0.296882	0.184456	-1.6095	0.107507	0.244469
ENSMUSG00000079330	59.8188	-0.719122	0.555997	-1.29339	0.195875	0.371982
ENSMUSG00000097540	3.29816	-0.10039	1.30302	-0.0770439	0.938589	NA
ENSMUSG00000101549	1.78943	3.3204	2.07402	1.60095	0.109388	NA
ENSMUSG00000042115	376.894	-0.0530967	0.234538	-0.226388	0.820899	0.902099
ENSMUSG00000009772	258.957	0.648267	0.287262	2.25671	0.0240262	0.0825239
ENSMUSG00000100658	16.0981	0.354106	0.656208	0.539624	0.589456	0.749862
ENSMUSG00000042066	1998.95	0.878814	0.176992	4.96528	6.86e-07	1.4e-05
ENSMUSG00000042046	2350.61	-0.0562096	0.173462	-0.324047	0.745903	0.855196
ENSMUSG00000097760	9.53594	-0.889027	0.872813	-1.01858	0.308404	0.503268
ENSMUSG00000026439	2163.9	0.301122	0.15366	1.95967	0.0500342	0.140925
ENSMUSG00000048174	164.443	0.478908	0.292656	1.63642	0.101752	0.235212
ENSMUSG00000053024	11.2573	-3.24735	1.06462	-3.05023	0.00228665	0.0134687
ENSMUSG00000054387	2535.78	0.250873	0.222066	1.12972	0.258593	0.448604
ENSMUSG00000100228	5.5439	0.869727	0.943939	0.921381	0.356852	0.552994
ENSMUSG00000026447	456.468	1.11433	0.263509	4.22883	2.35e-05	0.000306968
ENSMUSG00000101102	17.7298	0.0216279	0.773206	0.0279717	0.977685	0.987946
ENSMUSG00000102425	18.4952	-0.448103	0.663788	-0.675069	0.499632	0.681154
ENSMUSG00000046062	4840.06	-0.277222	0.150614	-1.84062	0.0656773	0.172012
ENSMUSG00000041757	34.5089	-3.37214	0.861025	-3.91642	8.99e-05	0.00094836
ENSMUSG00000101693	1.48093	-2.78134	2.15054	-1.29332	0.195901	NA
ENSMUSG00000070644	2.7162	1.83271	1.75728	1.04292	0.296984	NA
ENSMUSG00000070643	8.236	-1.12485	1.03559	-1.08619	0.277393	0.469251
ENSMUSG00000090553	1018.83	-0.214914	0.208354	-1.03149	0.302312	0.497026
ENSMUSG00000097014	3.10586	-0.94504	1.46475	-0.645188	0.518805	NA
ENSMUSG00000102976	474.406	-0.431383	0.248103	-1.73873	0.0820828	0.202484
ENSMUSG00000094410	79.2818	-0.238608	0.345194	-0.691228	0.489422	0.673172
ENSMUSG00000051998	2.31101	-0.250916	1.55837	-0.161012	0.872084	NA
ENSMUSG00000026463	4484.88	-0.419962	0.292822	-1.43419	0.151517	0.312141
ENSMUSG00000102509	6.4397	-0.620593	1.17464	-0.528325	0.597274	0.755817
ENSMUSG00000010311	84.7428	0.950804	0.432349	2.19916	0.0278666	0.0917355
ENSMUSG00000041577	685.174	-2.11718	0.343103	-6.17069	6.8e-10	2.93e-08
ENSMUSG00000041559	393.835	-2.48359	1.11676	-2.22393	0.026153	0.0876842
ENSMUSG00000020423	1357.43	-0.0295983	0.208785	-0.141765	0.887266	0.941423
ENSMUSG00000102380	27.8044	0.97977	0.50661	1.93397	0.0531164	0.147158
ENSMUSG00000026450	4.95921	-1.28646	1.01691	-1.26506	0.20585	0.385511
ENSMUSG00000064246	338.618	-0.0516812	0.839265	-0.0615792	0.950898	0.974192
ENSMUSG00000042451	22532.1	-0.030258	0.389894	-0.0776057	0.938142	0.967964
ENSMUSG00000042429	475.165	-0.420077	0.312031	-1.34627	0.178217	0.348348
ENSMUSG00000026459	51311.6	-0.0391553	0.235858	-0.166012	0.868147	0.931305
ENSMUSG00000026458	1468.55	0.163121	0.223645	0.729377	0.465771	0.651249
ENSMUSG00000042305	2990.9	-0.192158	0.176949	-1.08595	0.277503	0.469282
ENSMUSG00000026456	16718.1	1.04323	0.248579	4.19678	2.71e-05	0.000344059
ENSMUSG00000026457	6799.72	-0.0685334	0.213683	-0.320725	0.748419	0.856473
ENSMUSG00000102722	12.6034	-0.522709	0.713652	-0.732442	0.463899	0.649876
ENSMUSG00000026455	1399.86	0.363033	0.180282	2.01369	0.0440418	0.128031
ENSMUSG00000042229	579.914	0.200009	0.183369	1.09074	0.275386	0.466848
ENSMUSG00000096712	6.42957	-0.302675	1.16837	-0.259057	0.795592	0.886784
ENSMUSG00000042207	2478.77	-0.180389	0.183283	-0.984212	0.325011	0.520779
ENSMUSG00000026452	3.94668	-0.307526	1.38298	-0.222365	0.82403	0.903528
ENSMUSG00000073557	1533.83	0.747274	0.232919	3.2083	0.00133524	0.00873729
ENSMUSG00000103614	1.82619	1.05385	1.95719	0.538451	0.590266	NA
ENSMUSG00000103976	28.6986	-0.954383	0.772681	-1.23516	0.216772	0.399088
ENSMUSG00000101168	2.19922	-0.995825	1.71883	-0.579361	0.562345	NA
ENSMUSG00000026429	55.5645	0.359186	0.374056	0.960246	0.336932	0.533582
ENSMUSG00000042793	103.379	-1.94573	0.671482	-2.89766	0.00375956	0.0199106
ENSMUSG00000097993	137.743	1.20941	0.38971	3.10336	0.00191334	0.0116884
ENSMUSG00000026426	1062.76	0.17879	0.200084	0.893575	0.371549	0.567377
ENSMUSG00000087721	2.87644	-0.83732	1.50799	-0.555256	0.57872	NA
ENSMUSG00000085311	4.48617	-1.13355	1.13062	-1.00259	0.316057	0.511365
ENSMUSG00000079139	663.805	0.345861	0.202546	1.70756	0.0877175	0.211766
ENSMUSG00000097680	19.5624	-0.258355	0.620598	-0.416299	0.677191	0.810892
ENSMUSG00000041926	557.727	0.598806	0.18615	3.21679	0.00129631	0.00855128
ENSMUSG00000062580	3377.92	0.107599	0.205386	0.523888	0.600356	0.758371
ENSMUSG00000048096	439.644	1.30064	0.307215	4.23364	2.3e-05	0.000301157
ENSMUSG00000041889	2778.18	-0.632921	0.242856	-2.60615	0.00915654	0.0394515
ENSMUSG00000041879	5466.04	0.0823957	0.158171	0.520929	0.602416	0.759386
ENSMUSG00000100620	1.68982	-4.0958	2.23145	-1.83549	0.0664333	NA
ENSMUSG00000009418	1896.38	-0.794903	0.235903	-3.36961	0.000752746	0.00548604
ENSMUSG00000102474	9.07426	-1.86826	1.01611	-1.83863	0.0659698	0.172435
ENSMUSG00000104524	20.2042	-1.73047	0.726772	-2.38103	0.0172642	0.0639762
ENSMUSG00000054412	10.5108	-0.839591	0.842494	-0.996554	0.318981	0.514296
ENSMUSG00000090399	149.607	-0.24705	0.308641	-0.800443	0.423454	0.615016
ENSMUSG00000026421	9208.09	0.396457	0.293467	1.35094	0.176714	0.3464
ENSMUSG00000041801	4662.97	0.821959	0.199148	4.12738	3.67e-05	0.000442046
ENSMUSG00000026418	50493	1.11185	0.377856	2.94253	0.00325541	0.0178245
ENSMUSG00000041782	56.3952	1.18073	0.437688	2.69764	0.00698323	0.032058
ENSMUSG00000026414	62937.8	1.16743	0.387204	3.01502	0.00256965	0.0148443
ENSMUSG00000101482	7.59664	1.49761	0.854336	1.75296	0.0796093	0.198385
ENSMUSG00000026413	2833.92	-0.37492	0.339886	-1.10308	0.269993	0.461178
ENSMUSG00000102414	9.97948	-2.19834	0.854959	-2.57128	0.0101324	0.0425732
ENSMUSG00000051985	2687.3	-1.7026	0.708397	-2.40345	0.0162412	0.0612516
ENSMUSG00000026411	2940.04	0.778807	0.233804	3.33103	0.000865251	0.00614623
ENSMUSG00000097918	2.38439	1.54625	1.67589	0.922643	0.356193	NA
ENSMUSG00000026407	11582	-0.131332	0.357027	-0.367848	0.712987	0.834751
ENSMUSG00000102838	22.8492	-1.11657	0.639993	-1.74465	0.0810451	0.200648
ENSMUSG00000102717	36.9134	-0.816356	0.521389	-1.56573	0.117411	0.261008
ENSMUSG00000086264	12.9504	1.07464	0.820973	1.30898	0.19054	0.364602
ENSMUSG00000041642	1645.52	1.20976	0.394708	3.06494	0.00217712	0.0129484
ENSMUSG00000041605	70.6645	-1.10428	0.561228	-1.96762	0.0491118	0.138944
ENSMUSG00000103594	2.71312	-4.77324	1.92128	-2.48441	0.0129765	NA
ENSMUSG00000102941	7.11797	-4.25334	1.76875	-2.40471	0.0161852	0.061109
ENSMUSG00000097433	6.2076	-0.761027	1.02149	-0.745018	0.456261	0.643822
ENSMUSG00000041570	2970.91	-0.323658	0.182838	-1.77019	0.0766956	0.193122
ENSMUSG00000097403	15.5133	-0.570112	0.605163	-0.942079	0.346152	0.542806
ENSMUSG00000026404	792.226	0.200806	0.214374	0.936708	0.348909	0.545576
ENSMUSG00000041498	212.482	-0.469151	0.322965	-1.45263	0.146325	0.304377
ENSMUSG00000097229	6.10425	1.02735	0.924169	1.11164	0.266291	0.457521
ENSMUSG00000041483	1536.53	-0.554543	0.173074	-3.20409	0.00135491	0.00883896
ENSMUSG00000097113	41.9762	1.68064	0.468396	3.58807	0.000333134	0.00279601
ENSMUSG00000097448	2.08316	-4.40267	2.01925	-2.18036	0.0292311	NA
ENSMUSG00000103728	1.58084	-0.926849	2.77581	-0.333902	0.738454	NA
ENSMUSG00000098243	43.1654	1.054	0.626377	1.68269	0.0924348	0.219841
ENSMUSG00000104118	48.8503	0.358119	0.730593	0.490175	0.62401	0.774803
ENSMUSG00000098045	5.16629	0.572291	1.24011	0.461483	0.644452	0.790261
ENSMUSG00000103038	5.31743	0.185536	1.21033	0.153293	0.878167	0.936825
ENSMUSG00000102277	10.0291	0.465846	0.81964	0.568354	0.569795	0.734741
ENSMUSG00000098145	3.406	-0.193007	1.33699	-0.144359	0.885217	NA
ENSMUSG00000102142	10.3695	0.226021	0.965959	0.233986	0.814996	0.899213
ENSMUSG00000104145	25.2611	-0.00197053	0.643738	-0.00306108	0.997558	0.999076
ENSMUSG00000103427	62.2297	-0.0177892	0.636416	-0.0279521	0.9777	0.987946
ENSMUSG00000098206	14.2737	0.186094	0.667312	0.278871	0.780344	0.878201
ENSMUSG00000104197	4.36985	1.184	1.5713	0.75352	0.451137	0.63952
ENSMUSG00000026395	1.78161	1.0647	1.98492	0.536395	0.591685	NA
ENSMUSG00000026393	6341.27	0.410639	0.145602	2.82028	0.00479811	0.0240046
ENSMUSG00000099510	4.40035	0.118192	1.10963	0.106515	0.915174	0.956825
ENSMUSG00000102651	5.09939	-0.331768	1.24336	-0.266832	0.789598	0.883438
ENSMUSG00000102448	14.4763	-0.429843	0.713261	-0.602644	0.546745	0.718065
ENSMUSG00000019230	90.5078	-0.862891	0.352857	-2.44544	0.0144676	0.055862
ENSMUSG00000079283	359.265	0.377672	0.261682	1.44325	0.14895	0.308077
ENSMUSG00000102365	2.90946	-0.447123	1.32295	-0.337973	0.735383	NA
ENSMUSG00000056268	1158.8	-0.543144	0.175067	-3.10249	0.001919	0.0117176
ENSMUSG00000104436	8.55668	-1.38027	1.03919	-1.32821	0.184108	0.35604
ENSMUSG00000104900	2.04301	-1.47605	1.6561	-0.891278	0.37278	NA
ENSMUSG00000102157	10.8135	-0.707217	0.822905	-0.859415	0.390112	0.584979
ENSMUSG00000105936	5.26244	-1.15289	1.15142	-1.00127	0.316694	0.511956
ENSMUSG00000102451	11.1148	-1.61282	0.857973	-1.8798	0.0601351	0.161022
ENSMUSG00000102243	4.57592	-0.355132	1.14368	-0.310516	0.756169	0.862208
ENSMUSG00000063681	1.80391	1.04791	1.7605	0.595235	0.551686	NA
ENSMUSG00000033964	2747.97	-0.163119	0.158547	-1.02884	0.303557	0.498215
ENSMUSG00000033952	868.717	-0.34283	0.277322	-1.23622	0.216378	0.398659
ENSMUSG00000089991	6.59762	-2.09126	1.17306	-1.78274	0.0746292	0.189172
ENSMUSG00000104496	15.788	0.24309	0.579068	0.419796	0.674634	0.809514
ENSMUSG00000085867	8.90575	-0.945741	0.783056	-1.20776	0.227141	0.411225
ENSMUSG00000103691	2.20884	0.945383	1.50668	0.627461	0.530357	NA
ENSMUSG00000026365	7977.36	-0.371189	0.338735	-1.09581	0.273162	0.464457
ENSMUSG00000052726	49.0285	-2.58976	0.838585	-3.08825	0.00201338	0.0121478
ENSMUSG00000101795	81.8785	0.785403	0.291726	2.69226	0.00709698	0.032493
ENSMUSG00000026361	1483.52	0.220636	0.232804	0.947733	0.343266	0.540112
ENSMUSG00000033849	343.776	3.31412	0.336188	9.85794	6.33e-23	1.62e-20
ENSMUSG00000089640	4.68758	-0.884918	1.17628	-0.752299	0.451871	0.640048
ENSMUSG00000018196	1040.52	0.0649107	0.156352	0.415156	0.678027	0.811309
ENSMUSG00000018199	2520.46	0.0203844	0.154657	0.131804	0.89514	0.945001
ENSMUSG00000018189	1227.77	0.972313	0.215359	4.51484	6.34e-06	9.87e-05
ENSMUSG00000100455	103.743	-0.0705293	0.336746	-0.209444	0.834102	0.909811
ENSMUSG00000026360	95.5041	-1.22488	0.525321	-2.33168	0.0197178	0.071022
ENSMUSG00000051079	6.76615	-2.17195	1.10108	-1.97256	0.0485453	0.137764
ENSMUSG00000100441	7.503	0.416322	0.80275	0.51862	0.604026	0.760702
ENSMUSG00000026357	1.99625	-4.33602	2.02172	-2.14472	0.0319754	NA
ENSMUSG00000099964	22.9733	-1.83324	0.558619	-3.28173	0.00103172	0.00707886
ENSMUSG00000102403	7.73968	-2.18531	1.05653	-2.06839	0.038603	0.116415
ENSMUSG00000035131	4674	-2.39776	0.189626	-12.6447	1.2e-36	7.88e-34
ENSMUSG00000080078	11.7747	-3.06583	0.935983	-3.27552	0.00105468	0.00721321
ENSMUSG00000087627	16.4108	-3.19812	0.893777	-3.57821	0.000345958	0.00287637
ENSMUSG00000085822	2.55758	-2.65276	2.04925	-1.2945	0.195492	NA
ENSMUSG00000102309	2.89953	5.09973	1.81878	2.80393	0.00504837	NA
ENSMUSG00000056220	865.326	1.01098	0.323806	3.12218	0.00179516	0.0110893
ENSMUSG00000097028	40.9971	0.228536	0.490537	0.46589	0.641294	0.787914
ENSMUSG00000032487	1069.76	0.756515	0.767732	0.985389	0.324433	0.520243
ENSMUSG00000097754	4.26172	0.324108	1.33178	0.243365	0.807723	0.894709
ENSMUSG00000099875	25.2639	-0.899768	0.524799	-1.7145	0.0864367	0.209716
ENSMUSG00000006010	2182.45	-0.305754	0.168817	-1.81116	0.0701167	0.180543
ENSMUSG00000006005	8899.51	-0.00108013	0.193199	-0.00559075	0.995539	0.997697
ENSMUSG00000006014	23.87	-1.60826	0.758155	-2.12128	0.0338986	0.1058
ENSMUSG00000066842	15.4201	2.48452	0.873163	2.84543	0.00443518	0.022673
ENSMUSG00000102095	2.00856	1.25086	1.90642	0.656132	0.511739	NA
ENSMUSG00000100954	171.009	0.445324	0.317591	1.40219	0.160857	0.325475
ENSMUSG00000023150	27813	0.391517	0.219151	1.78652	0.0740154	0.18823
ENSMUSG00000052748	778.248	0.0427527	0.170083	0.251364	0.801533	0.890469
ENSMUSG00000053286	1942.11	-0.229042	0.171055	-1.339	0.180571	0.351425
ENSMUSG00000103928	24.6932	0.0266296	0.557678	0.0477508	0.961915	0.979436
ENSMUSG00000026484	2441.58	0.305543	0.171319	1.78348	0.0745083	0.189029
ENSMUSG00000103238	21.8265	-0.208991	0.608636	-0.343376	0.731315	0.846382
ENSMUSG00000026483	53.5913	-1.26361	0.441227	-2.86386	0.0041851	0.0216733
ENSMUSG00000100594	34.6383	-0.614459	0.462792	-1.32772	0.184269	0.356231
ENSMUSG00000043019	7382.22	0.530864	0.191993	2.76502	0.00569186	0.0274329
ENSMUSG00000032666	725.535	1.77776	0.261793	6.79072	1.12e-11	6.87e-10
ENSMUSG00000014980	774.003	0.143509	0.184587	0.777462	0.436886	0.627398
ENSMUSG00000026482	324.408	0.475599	0.265139	1.79377	0.0728495	0.185763
ENSMUSG00000080950	2.39736	-1.8007	1.57559	-1.14287	0.253091	NA
ENSMUSG00000008475	2280.32	-0.956768	0.192067	-4.98144	6.31e-07	1.3e-05
ENSMUSG00000026480	13.1368	-0.619857	0.699259	-0.886449	0.375376	0.571121
ENSMUSG00000042772	2950.02	0.390238	0.170026	2.29516	0.0217237	0.0761911
ENSMUSG00000100394	7.56094	-1.44833	1.10377	-1.31217	0.189464	0.363154
ENSMUSG00000042751	793.384	-3.48817	0.360894	-9.66535	4.23e-22	9.92e-20
ENSMUSG00000026479	229.867	-0.244621	0.374082	-0.653923	0.513161	0.692129
ENSMUSG00000026478	9152.94	0.518345	0.232606	2.22842	0.0258522	0.087066
ENSMUSG00000103818	10.1093	-1.58478	0.814606	-1.94545	0.0517206	0.144391
ENSMUSG00000079138	5.31017	0.275096	1.14056	0.241194	0.809404	0.895851
ENSMUSG00000042708	4.25337	-2.82202	1.43543	-1.96598	0.0493012	0.13925
ENSMUSG00000103543	1.61377	0.211909	1.7794	0.11909	0.905204	NA
ENSMUSG00000042699	1954.92	-1.20876	0.230047	-5.25441	1.48e-07	3.7e-06
ENSMUSG00000042684	1.84158	1.70543	1.94464	0.876989	0.380492	NA
ENSMUSG00000099858	26.8365	-0.191773	0.631073	-0.303885	0.761216	0.865996
ENSMUSG00000042671	220.275	5.1272	0.364109	14.0815	4.94e-45	7.68e-42
ENSMUSG00000100334	2.85854	-0.729288	1.39719	-0.521968	0.601693	NA
ENSMUSG00000026475	661.873	0.429132	0.233282	1.83955	0.0658349	0.172293
ENSMUSG00000099568	5.41264	-0.401409	0.975412	-0.411528	0.680685	0.813087
ENSMUSG00000066800	27.3913	-0.978249	0.498097	-1.96397	0.0495333	0.139767
ENSMUSG00000045968	18.6991	0.400168	0.641739	0.623568	0.532911	0.707886
ENSMUSG00000026473	12703	0.252519	0.283796	0.889792	0.373578	0.569421
ENSMUSG00000100627	2.68771	-0.543722	1.56145	-0.348217	0.727677	NA
ENSMUSG00000004110	3.86021	0.0753442	1.20644	0.0624515	0.950203	NA
ENSMUSG00000096950	9.37037	0.713416	0.816307	0.873956	0.382142	0.577335
ENSMUSG00000056708	1649.79	0.223429	0.196617	1.13637	0.255803	0.445879
ENSMUSG00000026471	2137.46	0.419765	0.1708	2.45764	0.0139854	0.0542818
ENSMUSG00000026470	1524.47	-0.177509	0.212733	-0.83442	0.404044	0.597181
ENSMUSG00000104181	4.90045	0.251565	1.12732	0.223154	0.823416	0.903203
ENSMUSG00000033722	1946.67	-1.31975	0.280818	-4.69965	2.61e-06	4.58e-05
ENSMUSG00000103670	9.27322	-0.611245	0.965777	-0.632906	0.526795	0.702954
ENSMUSG00000026469	4238.84	-0.0993195	0.177217	-0.56044	0.575179	0.739092
ENSMUSG00000073535	149.081	0.659519	0.559559	1.17864	0.238541	0.425247
ENSMUSG00000033701	1374.3	0.171561	0.19061	0.900062	0.368087	0.564077
ENSMUSG00000033684	10825.2	0.212515	0.276708	0.768012	0.44248	0.631666
ENSMUSG00000102299	3.49728	0.881459	1.21849	0.723404	0.469432	NA
ENSMUSG00000102558	7.06618	-0.251719	0.873574	-0.288148	0.773233	0.873071
ENSMUSG00000033671	2821.37	0.164652	0.176163	0.934658	0.349965	0.546434
ENSMUSG00000102833	12.3755	-0.021731	0.684278	-0.0317576	0.974665	0.986371
ENSMUSG00000026466	864.295	-0.530507	0.185269	-2.86343	0.00419076	0.021683
ENSMUSG00000102964	29.8684	-1.59636	0.561808	-2.84147	0.00449056	0.0228808
ENSMUSG00000050565	6851.65	0.295936	0.160773	1.84071	0.0656646	0.172005
ENSMUSG00000060985	1.99982	-0.979483	1.90285	-0.514745	0.606732	NA
ENSMUSG00000026602	1.70953	-1.89853	1.98391	-0.956963	0.338586	NA
ENSMUSG00000026601	7.97682	0.385207	0.844472	0.456151	0.648282	0.793573
ENSMUSG00000078193	235.54	0.438816	0.326692	1.34321	0.179204	0.349705
ENSMUSG00000026600	6957.96	-0.658993	0.181262	-3.63558	0.000277359	0.00241805
ENSMUSG00000103199	16.4022	-1.98837	0.80539	-2.46882	0.0135559	0.0530774
ENSMUSG00000026596	1904.51	-0.105181	0.20136	-0.522353	0.601425	0.758927
ENSMUSG00000104293	6.48834	-0.827681	0.995952	-0.831045	0.405948	0.599112
ENSMUSG00000060519	3950.71	-0.307738	0.207315	-1.48439	0.137705	0.291695
ENSMUSG00000033557	4312.22	0.0554062	0.154297	0.359087	0.71953	0.839084
ENSMUSG00000046057	5.93409	-0.478416	1.05025	-0.455527	0.64873	0.7938
ENSMUSG00000026594	1599.82	0.956223	0.23474	4.07354	4.63e-05	0.000540635
ENSMUSG00000103303	2.27295	-0.596909	1.44709	-0.412489	0.679981	NA
ENSMUSG00000102960	4.17562	-0.433789	1.06985	-0.405467	0.685134	0.816248
ENSMUSG00000026592	5.98215	3.13179	1.17697	2.66088	0.00779362	0.0350262
ENSMUSG00000070565	2093.28	-0.425604	0.213696	-1.99163	0.0464118	0.133289
ENSMUSG00000087632	2.86863	-2.82469	1.61959	-1.74408	0.0811453	NA
ENSMUSG00000103808	8.33564	-1.38471	0.872145	-1.5877	0.112353	0.252603
ENSMUSG00000049881	728.321	0.27413	0.204319	1.34168	0.179701	0.350324
ENSMUSG00000026589	584.16	-0.265787	0.326212	-0.814768	0.415205	0.608107
ENSMUSG00000004031	5.81966	1.62326	1.55202	1.0459	0.295608	0.489911
ENSMUSG00000073530	36.2415	6.29645	0.928194	6.78354	1.17e-11	7.14e-10
ENSMUSG00000040782	4477.41	0.236682	0.167333	1.41444	0.157234	0.320254
ENSMUSG00000103572	29.495	-0.64357	0.622771	-1.0334	0.301418	0.496304
ENSMUSG00000103186	2.56485	-0.859101	1.54487	-0.556097	0.578144	NA
ENSMUSG00000090394	32.4977	-0.142134	0.478605	-0.296977	0.766484	0.869008
ENSMUSG00000026725	16.7598	-3.08225	0.907015	-3.39823	0.000678223	0.00501989
ENSMUSG00000058267	554.462	0.382088	0.231003	1.65404	0.0981202	0.229635
ENSMUSG00000014226	5684.69	0.291737	0.17702	1.64805	0.0993427	0.231664
ENSMUSG00000103006	39.7178	-0.215334	0.462686	-0.465399	0.641646	0.788119
ENSMUSG00000026721	1263.55	-0.529031	0.174328	-3.03468	0.00240791	0.0140523
ENSMUSG00000104302	4.90068	-0.985105	1.12233	-0.877728	0.380091	0.575911
ENSMUSG00000103522	1.56066	-1.76226	2.21021	-0.79733	0.42526	NA
ENSMUSG00000103693	4.62314	0.0910459	1.30294	0.0698773	0.944291	0.971088
ENSMUSG00000104026	2.80237	-1.09787	1.56409	-0.701919	0.48273	NA
ENSMUSG00000104020	2.23656	-0.998687	1.86862	-0.534451	0.59303	NA
ENSMUSG00000103391	3.02648	0.588193	1.78406	0.329693	0.741632	NA
ENSMUSG00000103432	4.65049	-2.49729	1.26431	-1.97521	0.0482439	0.137033
ENSMUSG00000103200	2.08453	-1.05491	1.88835	-0.558642	0.576406	NA
ENSMUSG00000104053	2.56684	-2.64111	1.65837	-1.5926	0.11125	NA
ENSMUSG00000040423	1616.53	-0.377984	0.175076	-2.15898	0.0308519	0.0987504
ENSMUSG00000103343	16.8813	-0.817874	0.645802	-1.26645	0.205353	0.384813
ENSMUSG00000103846	3.56147	-0.0491992	1.34463	-0.0365894	0.970812	NA
ENSMUSG00000103739	24.4153	-0.587752	0.726238	-0.80931	0.418337	0.610446
ENSMUSG00000026715	4.75856	-0.976488	1.04573	-0.93379	0.350412	0.546879
ENSMUSG00000043467	579.252	-0.561914	0.246771	-2.27706	0.0227824	0.0792058
ENSMUSG00000104016	6.01131	-1.69433	1.1314	-1.49755	0.134249	0.286463
ENSMUSG00000053332	3324.58	-0.057529	0.176708	-0.325559	0.744758	0.854571
ENSMUSG00000026709	1002.65	-0.199767	0.172923	-1.15524	0.247993	0.436501
ENSMUSG00000026708	130.154	-0.39042	0.300666	-1.29852	0.19411	0.369655
ENSMUSG00000026705	1596.26	0.0173194	0.167301	0.103523	0.917548	0.957809
ENSMUSG00000044835	7.48278	-0.0475679	0.958025	-0.049652	0.9604	0.97909
ENSMUSG00000102817	3.36208	0.857674	1.26614	0.677393	0.498156	NA
ENSMUSG00000026701	5210.9	0.721427	0.215516	3.34744	0.000815624	0.00583734
ENSMUSG00000066755	1.66551	-0.973051	2.01988	-0.481738	0.629992	NA
ENSMUSG00000040323	20.5685	0.306485	0.522545	0.586524	0.557523	0.725256
ENSMUSG00000102399	3.25467	-1.4038	1.37044	-1.02434	0.305673	NA
ENSMUSG00000103625	2.64656	-0.922437	1.40401	-0.657002	0.511179	NA
ENSMUSG00000040297	1427.42	0.105505	0.212796	0.495802	0.620034	0.771985
ENSMUSG00000026698	1018.04	0.190504	0.211963	0.898759	0.368781	0.564727
ENSMUSG00000040265	161.756	2.83003	0.337778	8.37838	5.37e-17	6.65e-15
ENSMUSG00000090260	5.42159	1.53397	1.19175	1.28716	0.19804	0.374845
ENSMUSG00000078190	1490.54	-0.670538	0.44057	-1.52198	0.128014	0.276895
ENSMUSG00000026694	717.513	0.445554	0.192116	2.31919	0.020385	0.0726134
ENSMUSG00000026696	1108.79	-0.0292841	0.183008	-0.160015	0.872869	0.933928
ENSMUSG00000040225	6783.75	-0.232427	0.190367	-1.22094	0.222109	0.405298
ENSMUSG00000098259	2.55133	1.24118	1.39218	0.891534	0.372643	NA
ENSMUSG00000026692	9.93942	-0.540624	0.859654	-0.628886	0.529424	0.705115
ENSMUSG00000040181	2919.3	-2.05964	0.372603	-5.52769	3.24e-08	9.77e-07
ENSMUSG00000040170	9.10084	-3.56193	1.11091	-3.20632	0.00134444	0.00879077
ENSMUSG00000026586	3624.93	-1.02514	0.235135	-4.3598	1.3e-05	0.000184794
ENSMUSG00000092188	10.2194	-1.74251	0.877128	-1.98661	0.0469656	0.134344
ENSMUSG00000096984	7.2496	-1.66099	1.06757	-1.55585	0.119743	0.264658
ENSMUSG00000103195	17.2084	-1.6676	0.673089	-2.47753	0.0132296	0.052105
ENSMUSG00000040124	1349.17	-1.27461	0.284345	-4.48262	7.37e-06	0.000113213
ENSMUSG00000088951	5.56623	-1.52517	1.09548	-1.39223	0.163853	0.329381
ENSMUSG00000102117	7.30124	1.20667	0.99531	1.21236	0.225376	0.409214
ENSMUSG00000026585	4892.29	-0.36588	0.16086	-2.27452	0.0229349	0.0795583
ENSMUSG00000026584	460.13	-0.5465	0.195051	-2.80183	0.0050814	0.0250989
ENSMUSG00000041406	125.318	-0.628601	0.313316	-2.00628	0.044826	0.129908
ENSMUSG00000041396	149.777	-1.15627	0.302461	-3.82289	0.000131899	0.00130963
ENSMUSG00000026580	6.63139	-1.42584	0.954597	-1.49366	0.135265	0.288097
ENSMUSG00000026579	20.8053	-4.78594	0.981837	-4.87447	1.09e-06	2.14e-05
ENSMUSG00000040918	731.034	1.41442	0.174663	8.09799	5.59e-16	6.17e-14
ENSMUSG00000026578	584.406	0.508303	0.230282	2.20731	0.0272927	0.0904208
ENSMUSG00000026577	1823.08	0.196999	0.209083	0.942206	0.346087	0.542804
ENSMUSG00000026575	428.105	-1.08255	0.275527	-3.92903	8.53e-05	0.000909532
ENSMUSG00000103493	2.8683	-1.13132	1.34036	-0.844042	0.398646	NA
ENSMUSG00000026576	1487.28	-0.159487	0.287534	-0.554671	0.57912	0.742345
ENSMUSG00000104011	2.0366	-0.333338	1.94972	-0.170967	0.864249	NA
ENSMUSG00000103383	5.48017	1.0605	1.03259	1.02703	0.304406	0.498789
ENSMUSG00000026574	591.93	-5.86555	0.986092	-5.94828	2.71e-09	1.04e-07
ENSMUSG00000104117	5.51044	-2.72272	1.23872	-2.19801	0.0279486	0.0919346
ENSMUSG00000103320	1.86289	-0.254471	1.94061	-0.13113	0.895673	NA
ENSMUSG00000040848	4638.35	-0.00900717	0.184002	-0.0489516	0.960958	0.9792
ENSMUSG00000040843	2270.76	0.256276	0.164531	1.55761	0.119326	0.264159
ENSMUSG00000102302	37.0094	-0.190244	0.436661	-0.435679	0.663069	0.802229
ENSMUSG00000040836	507.185	-1.25447	0.237826	-5.27476	1.33e-07	3.36e-06
ENSMUSG00000026571	3533.95	0.264003	0.209557	1.25981	0.207736	0.387876
ENSMUSG00000104427	1.6304	-2.93416	2.3822	-1.2317	0.218061	NA
ENSMUSG00000102401	20.4288	-0.183258	0.561208	-0.326541	0.744015	0.854055
ENSMUSG00000026568	1053.82	0.261816	0.212556	1.23175	0.218042	0.400216
ENSMUSG00000103763	3.24327	-1.84607	1.40722	-1.31186	0.189569	NA
ENSMUSG00000026567	2.36088	1.12114	1.81055	0.619226	0.535767	NA
ENSMUSG00000026566	143.117	0.225139	0.269364	0.835819	0.403257	0.596378
ENSMUSG00000040723	3.54049	0.608764	1.16117	0.524266	0.600093	NA
ENSMUSG00000040713	2241.72	-0.569583	0.210178	-2.71	0.00672829	0.0312228
ENSMUSG00000005763	2.55173	0.867878	1.61557	0.537196	0.591132	NA
ENSMUSG00000026565	747.365	0.0527073	0.204322	0.257963	0.796436	0.887378
ENSMUSG00000026564	6853.16	0.354945	0.257312	1.37944	0.16776	0.334757
ENSMUSG00000000544	3.89174	-0.889461	1.37134	-0.648605	0.516593	NA
ENSMUSG00000040612	114.334	-1.1396	0.388436	-2.93382	0.00334817	0.0182216
ENSMUSG00000103400	7.26916	-2.28923	1.00059	-2.28787	0.0221448	0.0774458
ENSMUSG00000026563	319.525	-0.44867	0.235233	-1.90735	0.0564756	0.153922
ENSMUSG00000089853	13.9955	-1.05573	0.743962	-1.41907	0.155879	0.318404
ENSMUSG00000040596	627.86	-0.21015	0.231301	-0.908556	0.363584	0.560381
ENSMUSG00000084093	15.0401	0.943273	0.6141	1.53603	0.124532	0.271922
ENSMUSG00000086925	4.46506	0.369571	1.12923	0.327276	0.743459	0.853596
ENSMUSG00000097823	5.9967	-1.71336	1.10756	-1.54697	0.121871	0.267702
ENSMUSG00000060568	55.0756	-1.22706	0.407394	-3.01196	0.00259564	0.0149289
ENSMUSG00000026558	5326.91	0.136214	0.190632	0.714542	0.474892	0.660132
ENSMUSG00000103139	1.79148	0.520192	1.76782	0.294256	0.768563	NA
ENSMUSG00000102909	1.6715	-0.37451	1.65375	-0.226462	0.820842	NA
ENSMUSG00000052428	2474.38	-0.0480868	0.193055	-0.249083	0.803296	0.891712
ENSMUSG00000095752	19.1448	-0.643692	0.627628	-1.02559	0.305083	0.499611
ENSMUSG00000026687	737.567	-0.30653	0.222628	-1.37687	0.168552	0.336062
ENSMUSG00000026688	1299.16	0.60935	0.35319	1.72527	0.0844781	0.20634
ENSMUSG00000052534	1614.03	-0.659992	0.198243	-3.3292	0.000870944	0.00617897
ENSMUSG00000103780	19.8118	-1.49056	0.717946	-2.07615	0.03788	0.114639
ENSMUSG00000102594	15.2721	-1.52918	0.762525	-2.00541	0.0449187	0.13005
ENSMUSG00000026683	738.443	-0.607344	0.286094	-2.12288	0.0337639	0.105504
ENSMUSG00000026678	2.65823	-0.612874	1.57021	-0.390313	0.696305	NA
ENSMUSG00000038530	26.5563	-1.73903	0.897863	-1.93685	0.0527636	0.146513
ENSMUSG00000026675	851.306	-0.344655	0.1653	-2.08503	0.0370669	0.112817
ENSMUSG00000097503	5.34916	-1.0557	1.05936	-0.996541	0.318987	0.514296
ENSMUSG00000026674	11511.6	0.375438	0.27513	1.36458	0.172384	0.340685
ENSMUSG00000026670	1508.39	0.538835	0.186027	2.89654	0.003773	0.0199558
ENSMUSG00000104266	4.19511	1.09331	1.13225	0.965612	0.334238	0.530889
ENSMUSG00000026667	1433.11	-0.807884	0.195809	-4.12588	3.69e-05	0.000444249
ENSMUSG00000044306	3.63743	-0.974674	1.43968	-0.677007	0.498401	NA
ENSMUSG00000073494	12.9077	-1.17438	0.748286	-1.56942	0.116549	0.259513
ENSMUSG00000096964	16.7235	-0.498348	0.645955	-0.77149	0.440417	0.630048
ENSMUSG00000102752	4.74314	1.85732	1.17306	1.58332	0.113349	0.25421
ENSMUSG00000038473	5.54381	0.428441	1.00742	0.425284	0.67063	0.806859
ENSMUSG00000102193	3.12948	0.0859418	1.2158	0.0706877	0.943646	NA
ENSMUSG00000038463	8499.97	-0.529474	0.25718	-2.05877	0.0395167	0.118294
ENSMUSG00000026663	17544.2	0.563367	0.219485	2.56676	0.0102653	0.0430046
ENSMUSG00000096310	1.57436	-0.860628	2.31908	-0.371107	0.710558	NA
ENSMUSG00000096547	2.62558	-0.867393	1.54614	-0.561007	0.574793	NA
ENSMUSG00000053925	26.0189	-0.321418	0.580305	-0.553877	0.579663	0.742534
ENSMUSG00000026659	227.403	0.012352	0.260446	0.0474262	0.962174	0.979642
ENSMUSG00000096968	4.61369	1.07011	1.12394	0.952098	0.341047	0.537462
ENSMUSG00000070524	11.0497	-1.2316	1.31469	-0.9368	0.348861	0.545576
ENSMUSG00000089838	7.88651	0.34852	0.81601	0.427103	0.669305	0.805966
ENSMUSG00000026656	7.06648	-2.77386	1.24692	-2.22458	0.0261096	0.0876842
ENSMUSG00000059089	50.6904	-1.99478	0.49976	-3.99148	6.57e-05	0.00072509
ENSMUSG00000026649	24.9498	0.976758	0.526412	1.8555	0.063525	0.167944
ENSMUSG00000058076	3065.09	0.632698	0.235463	2.68703	0.007209	0.0328651
ENSMUSG00000056569	2.79142	0.971935	1.4085	0.690048	0.490164	NA
ENSMUSG00000005677	2.42963	0.0194753	1.38029	0.0141096	0.988743	NA
ENSMUSG00000005674	190.136	0.557169	0.271441	2.05263	0.0401082	0.119709
ENSMUSG00000058715	3.2742	-0.0756274	1.21934	-0.0620231	0.950544	NA
ENSMUSG00000013593	13121	0.477498	0.209231	2.28216	0.0224799	0.0783774
ENSMUSG00000006403	1099.55	-0.996421	0.241975	-4.11786	3.82e-05	0.000457728
ENSMUSG00000052423	534.17	0.329437	0.221192	1.48937	0.13639	0.289735
ENSMUSG00000062729	616.464	0.123565	0.183546	0.673211	0.500813	0.681984
ENSMUSG00000053483	833.739	0.15708	0.18011	0.872135	0.383135	0.578116
ENSMUSG00000062963	2268.36	-0.230308	0.209832	-1.09758	0.272386	0.463645
ENSMUSG00000103983	98.1438	-0.497333	0.431252	-1.15323	0.248816	0.437725
ENSMUSG00000013973	182	0.176809	0.274472	0.64418	0.519459	0.697327
ENSMUSG00000013997	999.11	-0.064939	0.188706	-0.344127	0.730751	0.846218
ENSMUSG00000006412	622.361	0.392861	0.207149	1.89651	0.0578923	0.156782
ENSMUSG00000102929	9.60865	-0.184953	0.963521	-0.191956	0.847777	0.918264
ENSMUSG00000006411	9.74767	1.32874	0.916348	1.45004	0.147047	0.305544
ENSMUSG00000026641	2893.72	0.219071	0.216286	1.01288	0.311119	0.506214
ENSMUSG00000103711	15.8828	0.313586	0.609827	0.514222	0.607097	0.762609
ENSMUSG00000038235	996.561	1.36136	0.473109	2.87748	0.00400859	0.0209621
ENSMUSG00000091993	23.0455	-0.740832	0.502038	-1.47565	0.140038	0.295061
ENSMUSG00000060244	115.913	-0.451925	0.263179	-1.71718	0.0859472	0.209003
ENSMUSG00000004709	2.50646	-2.53626	1.94423	-1.3045	0.192063	NA
ENSMUSG00000059058	150.653	0.0354439	0.259556	0.136556	0.891382	0.943689
ENSMUSG00000026556	253.157	0.294528	0.234029	1.25851	0.208207	0.388585
ENSMUSG00000003458	2005.17	-0.23658	0.167085	-1.41593	0.156797	0.319554
ENSMUSG00000026553	20698.1	0.0891756	0.188561	0.472927	0.636265	0.783931
ENSMUSG00000102779	14.7195	0.861855	0.619623	1.39094	0.164245	0.329985
ENSMUSG00000103380	9.00745	-0.600764	0.796045	-0.754685	0.450438	0.638947
ENSMUSG00000003464	4947.69	0.414572	0.225617	1.8375	0.0661356	0.172789
ENSMUSG00000089803	14.5735	0.946752	0.612485	1.54576	0.122164	0.268074
ENSMUSG00000026554	11092.2	0.032916	0.157689	0.208739	0.834652	0.910099
ENSMUSG00000013698	4005.52	-0.944357	0.301216	-3.13515	0.00171767	0.0106925
ENSMUSG00000007122	2233.71	-0.184351	1.20721	-0.152708	0.878629	0.936967
ENSMUSG00000092085	3.47021	-0.505083	1.41041	-0.358112	0.72026	NA
ENSMUSG00000007107	16.8878	3.49298	0.723313	4.82914	1.37e-06	2.61e-05
ENSMUSG00000038034	2325.12	0.570201	0.259258	2.19936	0.0278524	0.091724
ENSMUSG00000007097	7335.98	0.879688	0.738311	1.19149	0.233462	0.419019
ENSMUSG00000050229	802.805	-0.532333	0.194566	-2.736	0.00621909	0.0294186
ENSMUSG00000102278	6.48498	0.110311	0.89918	0.12268	0.902361	0.949488
ENSMUSG00000026548	12.0422	1.58342	0.874106	1.81147	0.0700682	0.180472
ENSMUSG00000037995	13.8877	3.25503	0.935451	3.47963	0.000502102	0.00390384
ENSMUSG00000026547	4982.99	-0.46467	0.256638	-1.81061	0.0702015	0.180653
ENSMUSG00000049598	1.72407	-1.95985	1.81589	-1.07928	0.280463	NA
ENSMUSG00000026544	20.053	0.712379	0.581935	1.22416	0.220893	0.404061
ENSMUSG00000026542	4.89971	1.71301	1.29691	1.32084	0.186556	0.359189
ENSMUSG00000005338	11.072	2.50674	0.864262	2.90044	0.00372645	0.0197953
ENSMUSG00000037860	108.2	5.85053	1.74094	3.36056	0.000777852	0.00561399
ENSMUSG00000037849	6.64881	5.29587	1.65372	3.2024	0.00136287	0.008874
ENSMUSG00000070501	1.77261	0.0262979	1.94165	0.0135441	0.989194	NA
ENSMUSG00000073491	2.00255	0.761044	1.89159	0.40233	0.687441	NA
ENSMUSG00000073490	8.16693	-1.32635	0.972654	-1.36364	0.17268	0.341033
ENSMUSG00000073489	1158.44	-1.26294	0.221547	-5.70054	1.19e-08	3.94e-07
ENSMUSG00000102433	5.48146	-1.20406	1.12853	-1.06693	0.286003	0.478771
ENSMUSG00000090272	46.7758	0.474951	0.412381	1.15173	0.249432	0.438268
ENSMUSG00000026536	323.763	-1.20586	0.258926	-4.65715	3.21e-06	5.49e-05
ENSMUSG00000039997	253.134	0.548354	0.27173	2.01801	0.04359	0.127107
ENSMUSG00000026535	1858.14	-1.72326	0.214186	-8.04563	8.58e-16	9.36e-14
ENSMUSG00000026532	82.7671	5.72724	0.620786	9.22577	2.82e-20	5.6e-18
ENSMUSG00000028354	5.71517	-0.745028	0.999946	-0.745069	0.45623	0.643822
ENSMUSG00000050069	18.2722	2.27182	0.751011	3.02502	0.00248619	0.0144549
ENSMUSG00000026527	6.47888	1.69384	1.20171	1.40953	0.158679	0.322198
ENSMUSG00000026526	5264.6	0.449958	0.209434	2.14845	0.0316782	0.100735
ENSMUSG00000039783	3.74815	0.364233	1.24024	0.293678	0.769004	NA
ENSMUSG00000026525	187.622	0.472537	0.245659	1.92355	0.054411	0.15021
ENSMUSG00000078185	1119.97	-0.503889	0.171457	-2.93887	0.00329413	0.0179847
ENSMUSG00000026523	1.58084	-0.926849	2.77581	-0.333902	0.738454	NA
ENSMUSG00000039748	77.5971	-1.63023	0.40754	-4.00016	6.33e-05	0.000703532
ENSMUSG00000078184	8.99986	0.234813	0.752657	0.311979	0.755057	0.861625
ENSMUSG00000057335	5310.54	-0.213926	0.192365	-1.11209	0.2661	0.457314
ENSMUSG00000103634	11.2019	-0.205682	0.876293	-0.234719	0.814427	0.898934
ENSMUSG00000104154	22.0525	-1.71339	0.895335	-1.91369	0.0556597	0.15263
ENSMUSG00000103435	6.63731	-0.619502	0.95587	-0.648103	0.516918	0.695063
ENSMUSG00000065573	2.21421	-2.46458	2.12821	-1.15805	0.246842	NA
ENSMUSG00000026504	924.112	-0.591385	0.182295	-3.24411	0.00117818	0.00791473
ENSMUSG00000103367	25.5451	-0.324573	0.479688	-0.676634	0.498638	0.680323
ENSMUSG00000103251	1.78106	-0.641322	1.72865	-0.370997	0.71064	NA
ENSMUSG00000019699	2710.77	0.680925	0.216947	3.13866	0.00169719	0.0106028
ENSMUSG00000104391	1.63815	-0.377403	1.78164	-0.211829	0.832241	NA
ENSMUSG00000102133	4.86519	-0.904602	1.42429	-0.635126	0.525347	0.701993
ENSMUSG00000102749	5.70421	-0.723021	1.0641	-0.679468	0.496841	0.678854
ENSMUSG00000103163	3.91918	-1.38153	1.25635	-1.09964	0.271489	NA
ENSMUSG00000103646	8.53351	0.337001	0.999223	0.337263	0.735918	0.84884
ENSMUSG00000102427	2.60413	-3.65568	1.87388	-1.95086	0.0510741	NA
ENSMUSG00000097892	46.2558	-0.919884	0.444059	-2.07153	0.0383089	0.115691
ENSMUSG00000063659	11104.1	0.545034	0.176921	3.08066	0.00206542	0.0124049
ENSMUSG00000103767	13.7817	1.08531	0.677737	1.60138	0.109293	0.24761
ENSMUSG00000101746	219.549	0.362436	0.378519	0.957512	0.338309	0.534921
ENSMUSG00000015962	1.68018	1.41843	1.69167	0.838479	0.401762	NA
ENSMUSG00000015961	3122.84	-0.400887	0.223786	-1.79139	0.0732312	0.186541
ENSMUSG00000089657	4.25854	-1.00723	1.1189	-0.900196	0.368016	0.564077
ENSMUSG00000091476	2.77558	0.144653	1.74378	0.0829537	0.933888	NA
ENSMUSG00000104097	2.07774	-0.9353	1.66176	-0.562836	0.573547	NA
ENSMUSG00000026502	3064.72	0.220953	0.169416	1.30421	0.192164	0.366823
ENSMUSG00000104126	5.46954	-0.647882	0.938685	-0.690201	0.490068	0.673551
ENSMUSG00000086350	54.5792	-0.855147	0.358111	-2.38794	0.0169432	0.0631679
ENSMUSG00000089788	298.907	-0.148419	0.36798	-0.403333	0.686703	0.817117
ENSMUSG00000039630	2028.05	-0.722248	0.256187	-2.81922	0.00481407	0.0240638
ENSMUSG00000104279	5.0805	-0.426979	1.05795	-0.403592	0.686512	0.817117
ENSMUSG00000026495	115.859	0.282385	0.312166	0.904598	0.365678	0.56219
ENSMUSG00000026494	1169.99	-0.57912	0.463162	-1.25036	0.211167	0.39244
ENSMUSG00000102922	4.69581	-1.39637	2.00765	-0.695524	0.486727	0.670842
ENSMUSG00000089713	2.63203	-1.90042	1.79865	-1.05658	0.290703	NA
ENSMUSG00000055067	594.424	0.794365	0.22174	3.58241	0.000340436	0.0028378
ENSMUSG00000096474	1.90108	1.07538	1.65438	0.650016	0.515682	NA
ENSMUSG00000026492	1469.42	0.324698	0.161664	2.00847	0.0445933	0.129348
ENSMUSG00000082395	7.61705	-0.804429	1.01495	-0.792583	0.428021	0.619242
ENSMUSG00000038949	1726.32	0.665427	0.176282	3.7748	0.000160139	0.0015432
ENSMUSG00000038936	2851.13	0.147097	0.216155	0.680516	0.496178	0.678265
ENSMUSG00000087236	3.42443	-3.14946	1.7367	-1.81347	0.0697591	NA
ENSMUSG00000026491	3218.55	0.150124	0.170234	0.881867	0.377849	0.573478
ENSMUSG00000073486	4.49019	-1.16397	1.30007	-0.895315	0.370619	0.566729
ENSMUSG00000104418	9.93429	0.442483	0.823919	0.537046	0.591236	0.751176
ENSMUSG00000026490	3516.77	-0.567842	0.250261	-2.269	0.0232684	0.0804802
ENSMUSG00000102194	9.36657	-2.66486	1.00131	-2.66137	0.00778228	0.0349937
ENSMUSG00000103636	22.7536	-0.208501	0.551124	-0.37832	0.705193	0.829596
ENSMUSG00000026489	4168.22	1.1707	0.354318	3.30411	0.000952783	0.00661687
ENSMUSG00000010609	1208.89	0.550795	0.247925	2.22162	0.0263089	0.0880135
ENSMUSG00000102923	2.03549	1.80104	1.71938	1.04749	0.294872	NA
ENSMUSG00000055676	10.2825	1.69441	0.837895	2.02223	0.0431528	0.126306
ENSMUSG00000038855	228.719	0.565495	0.391436	1.44467	0.148552	0.307587
ENSMUSG00000104388	3.19137	-1.7959	1.38762	-1.29423	0.195585	NA
ENSMUSG00000026496	4233.3	0.316781	0.186126	1.70197	0.0887611	0.213418
ENSMUSG00000058729	480.2	0.569298	0.207233	2.74715	0.00601165	0.0286699
ENSMUSG00000026499	3417.29	0.483491	0.20749	2.33019	0.0197962	0.0711972
ENSMUSG00000103649	66.4827	0.601355	0.343887	1.7487	0.080343	0.199516
ENSMUSG00000103156	1.68091	-0.343975	1.98204	-0.173546	0.862222	NA
ENSMUSG00000060743	5497.82	-0.108692	0.245668	-0.442437	0.658173	0.799067
ENSMUSG00000097347	105.888	-0.141777	0.31786	-0.446036	0.655571	0.797833
ENSMUSG00000073485	42.8017	0.0107049	0.430567	0.0248624	0.980165	0.989245
ENSMUSG00000038806	1192.93	-0.17398	0.18797	-0.925569	0.35467	0.551184
ENSMUSG00000103979	8.20408	-0.591135	0.923694	-0.639968	0.522193	0.699406
ENSMUSG00000026520	1075.43	0.253123	0.212321	1.19217	0.233193	0.418681
ENSMUSG00000026519	1269.68	-0.111024	0.164143	-0.676385	0.498796	0.68043
ENSMUSG00000085563	7.84478	-0.810949	0.901967	-0.899089	0.368605	0.564609
ENSMUSG00000038776	7004.76	-0.540247	0.189857	-2.84555	0.00443353	0.0226713
ENSMUSG00000026516	2027.25	-0.130752	0.169854	-0.769792	0.441423	0.630804
ENSMUSG00000062169	2669.76	0.517633	0.178551	2.89908	0.0037426	0.0198564
ENSMUSG00000038733	6896.85	-0.105594	0.148849	-0.709401	0.478075	0.663164
ENSMUSG00000054135	8.61401	-0.874607	0.835297	-1.04706	0.295071	0.489069
ENSMUSG00000081214	3.58367	-0.249535	1.252	-0.199309	0.842021	NA
ENSMUSG00000026514	2.26685	-1.10213	1.46911	-0.750203	0.453132	NA
ENSMUSG00000104003	2.93801	-1.62595	1.37857	-1.17945	0.238221	NA
ENSMUSG00000004880	1996.52	-0.176336	0.220576	-0.799434	0.424039	0.61572
ENSMUSG00000022995	11519.2	0.600565	0.170861	3.51493	0.000439876	0.00348821
ENSMUSG00000103722	23.0919	-0.321273	0.665745	-0.482577	0.629396	0.77889
ENSMUSG00000103317	10.4114	-0.521489	0.729544	-0.714816	0.474723	0.660013
ENSMUSG00000102950	10.8918	-0.495935	0.79698	-0.622268	0.533766	0.708416
ENSMUSG00000102760	14.0728	-0.197797	0.71906	-0.275076	0.783257	0.880162
ENSMUSG00000026511	2173.58	0.256989	0.196564	1.3074	0.191076	0.365383
ENSMUSG00000038633	6260.52	0.263865	0.222138	1.18784	0.234896	0.420766
ENSMUSG00000100147	2.01	-0.886172	1.92752	-0.459746	0.645698	NA
ENSMUSG00000047539	2054.85	0.491848	0.167356	2.93894	0.00329338	0.0179847
ENSMUSG00000073482	6.82713	0.402401	0.938308	0.428858	0.668027	0.8052
ENSMUSG00000026510	540.592	-0.0632932	0.17953	-0.35255	0.724426	0.842545
ENSMUSG00000026509	8810.68	-0.126532	0.18735	-0.675377	0.499436	0.680994
ENSMUSG00000102234	6.26087	-0.371353	1.30325	-0.284944	0.775687	0.874962
ENSMUSG00000104415	10.248	-0.79428	0.909546	-0.87327	0.382516	0.577679
ENSMUSG00000102291	9.04726	1.29099	0.773062	1.66996	0.0949266	0.224069
ENSMUSG00000030768	1784.09	0.112369	0.21355	0.526194	0.598754	0.757073
ENSMUSG00000102478	19.339	-0.254377	0.573209	-0.443777	0.657204	0.798457
ENSMUSG00000046836	5034.04	0.0551078	0.161008	0.342268	0.732149	0.846748
ENSMUSG00000042901	4102.68	-0.349051	0.215242	-1.62167	0.104874	0.240208
ENSMUSG00000056050	4991.51	0.0929822	0.186807	0.497744	0.618665	0.771077
ENSMUSG00000072258	291.841	-0.925011	0.208869	-4.42866	9.48e-06	0.00014018
ENSMUSG00000053461	2.83078	0.472606	1.3833	0.341651	0.732614	NA
ENSMUSG00000104022	1.78461	1.06757	1.96127	0.544323	0.586219	NA
ENSMUSG00000039384	1900.82	1.29876	0.309221	4.2001	2.67e-05	0.000339799
ENSMUSG00000044854	17.0403	0.14881	0.621575	0.239408	0.810789	0.896751
ENSMUSG00000102682	1.71062	0.904507	2.29581	0.393982	0.693594	NA
ENSMUSG00000101574	1.77464	-0.649928	1.72923	-0.375848	0.70703	NA
ENSMUSG00000103308	7.21228	-1.25242	0.942756	-1.32847	0.184022	0.355986
ENSMUSG00000039377	395.1	0.0882522	0.241654	0.365201	0.714962	0.836371
ENSMUSG00000073481	1960.48	0.832203	0.220173	3.77977	0.000156973	0.00151868
ENSMUSG00000039318	3931.86	0.521594	0.169653	3.07448	0.00210871	0.0126382
ENSMUSG00000103613	12.9575	-0.0742365	0.637125	-0.116518	0.907242	0.952691
ENSMUSG00000026618	2915.74	-0.134667	0.168484	-0.799285	0.424125	0.615741
ENSMUSG00000104368	2.40697	0.107125	1.53313	0.0698735	0.944294	NA
ENSMUSG00000102526	10.3773	-0.263921	0.79385	-0.332457	0.739544	0.85173
ENSMUSG00000026617	1211.16	-0.302881	0.174099	-1.73971	0.0819103	0.202146
ENSMUSG00000097261	22.0295	-1.53003	0.604343	-2.53173	0.0113502	0.0463908
ENSMUSG00000026615	32586.3	0.102866	0.220299	0.466939	0.640543	0.787387
ENSMUSG00000051295	6.13914	-0.515937	0.967872	-0.533063	0.59399	0.753203
ENSMUSG00000039246	349.698	-0.292775	0.260822	-1.12251	0.261646	0.452294
ENSMUSG00000103056	3.18935	-1.31595	1.47221	-0.893863	0.371395	NA
ENSMUSG00000039239	4125.37	0.244974	0.293516	0.834619	0.403932	0.59717
ENSMUSG00000100393	2.2133	-2.33901	1.68032	-1.392	0.163922	NA
ENSMUSG00000102619	3.1324	-0.926472	1.33022	-0.696478	0.486129	NA
ENSMUSG00000001305	1215.01	0.0317428	0.209858	0.151258	0.879772	0.937279
ENSMUSG00000097784	22.8354	-0.545823	0.673058	-0.810961	0.417388	0.609999
ENSMUSG00000026611	7.02025	0.301916	0.931521	0.324111	0.745854	0.855196
ENSMUSG00000089730	1.70246	1.41848	1.79677	0.789461	0.429843	NA
ENSMUSG00000039210	965.552	-0.11842	0.166962	-0.709262	0.478162	0.663177
ENSMUSG00000104394	73.4392	0.186005	0.389678	0.477331	0.633127	0.781528
ENSMUSG00000104245	38.9359	0.102663	0.541504	0.189588	0.849632	0.919458
ENSMUSG00000026610	104.495	4.66313	1.29443	3.60247	0.000315212	0.00268244
ENSMUSG00000026609	1.70246	1.41848	1.79677	0.789461	0.429843	NA
ENSMUSG00000026608	2318.25	0.582711	0.159997	3.64202	0.000270509	0.00237406
ENSMUSG00000037624	67.0692	-0.116899	0.489099	-0.239009	0.811099	0.896831
ENSMUSG00000102824	99.7377	0.341387	0.306177	1.115	0.264851	0.455901
ENSMUSG00000104507	1.64282	-1.94738	2.31162	-0.842431	0.399547	NA
ENSMUSG00000026605	1376.16	-0.280128	0.304364	-0.92037	0.357379	0.553561
ENSMUSG00000103374	1.82339	-1.33416	1.84602	-0.722721	0.469851	NA
ENSMUSG00000026604	1705.53	-0.443223	0.268673	-1.64967	0.0990101	0.231122
ENSMUSG00000097925	10.0456	-0.291224	0.819242	-0.355479	0.722231	0.840849
ENSMUSG00000104435	67.8128	-0.345466	0.401584	-0.860259	0.389646	0.584737
ENSMUSG00000026603	646.799	0.00202077	0.188095	0.0107433	0.991428	0.995152
ENSMUSG00000103467	10.023	-0.241133	0.915319	-0.263441	0.792211	0.885043
ENSMUSG00000010175	109.119	-2.82694	0.455827	-6.20178	5.58e-10	2.47e-08
ENSMUSG00000089872	1582.62	-0.107264	0.170892	-0.62767	0.53022	0.705791
ENSMUSG00000026634	1168.75	-0.807709	0.184311	-4.38232	1.17e-05	0.000169348
ENSMUSG00000037568	5451.57	1.20596	0.226925	5.31436	1.07e-07	2.76e-06
ENSMUSG00000066595	340.605	-0.45085	0.20008	-2.25334	0.0242376	0.0829748
ENSMUSG00000097845	1.69368	-1.93415	1.84014	-1.05109	0.293218	NA
ENSMUSG00000026632	386.148	0.0972213	0.19929	0.487838	0.625665	0.776126
ENSMUSG00000062510	136.342	-0.762807	0.325464	-2.34375	0.019091	0.0692434
ENSMUSG00000026628	735.538	1.47354	0.484116	3.04376	0.00233638	0.013705
ENSMUSG00000073478	46.5341	1.01635	0.370908	2.74017	0.00614081	0.0291559
ENSMUSG00000103685	3.76853	-0.683733	1.18622	-0.576396	0.564347	NA
ENSMUSG00000037499	2668.07	0.147022	0.194592	0.755538	0.449926	0.638671
ENSMUSG00000026627	707.931	0.411287	0.215227	1.91095	0.0560116	0.15317
ENSMUSG00000026626	3439.44	-0.506403	0.172718	-2.93196	0.00336831	0.0182905
ENSMUSG00000102246	2.54799	-3.62291	1.82452	-1.98568	0.047069	NA
ENSMUSG00000037474	304.682	-1.48726	0.297932	-4.99192	5.98e-07	1.24e-05
ENSMUSG00000037461	1662.61	-0.0971004	0.17699	-0.548622	0.583265	0.74559
ENSMUSG00000102970	4.65445	-1.75255	1.21828	-1.43854	0.15028	0.310003
ENSMUSG00000026623	3939.77	0.161064	0.213394	0.75477	0.450387	0.638947
ENSMUSG00000102840	4.94127	-1.58442	1.11956	-1.41522	0.157003	0.319821
ENSMUSG00000026622	478.082	-0.100748	0.283242	-0.355695	0.722069	0.840718
ENSMUSG00000055833	2.19245	-0.464159	1.68528	-0.27542	0.782993	NA
ENSMUSG00000037434	616.816	-0.305844	0.183882	-1.66326	0.0962609	0.226267
ENSMUSG00000097416	14.862	-0.569673	0.820421	-0.694367	0.487452	0.671218
ENSMUSG00000026637	287.343	-0.945861	0.319742	-2.9582	0.00309441	0.0171572
ENSMUSG00000103653	31.0055	0.13322	0.519187	0.256594	0.797492	0.888059
ENSMUSG00000037395	898.038	-0.0332932	0.216408	-0.153844	0.877732	0.936653
ENSMUSG00000097316	41.6801	-1.52672	0.443691	-3.44094	0.000579687	0.00439714
ENSMUSG00000058248	4.17888	-1.55223	1.18908	-1.30541	0.191754	0.366394
ENSMUSG00000037375	268.313	-0.838529	0.290651	-2.885	0.0039141	0.0205433
ENSMUSG00000094131	7.37977	0.330535	0.930164	0.355351	0.722326	0.840903
ENSMUSG00000047384	4.70671	-1.2589	1.2289	-1.02441	0.305643	0.50029
ENSMUSG00000100872	8.91377	-1.81343	0.820116	-2.21118	0.0270232	0.0898409
ENSMUSG00000016262	3080.21	-1.5777	0.223344	-7.06396	1.62e-12	1.14e-10
ENSMUSG00000089812	242.941	-0.282634	0.23867	-1.1842	0.236332	0.422365
ENSMUSG00000016200	1.63139	0.263731	2.05832	0.128129	0.898047	NA
ENSMUSG00000103640	1.47583	-1.7558	2.39729	-0.732411	0.463918	NA
ENSMUSG00000016181	908.042	0.0358899	0.221159	0.162281	0.871084	0.933168
ENSMUSG00000026638	97.1459	0.682145	0.328222	2.07831	0.0376813	0.114158
ENSMUSG00000079144	323.877	-0.026898	0.217235	-0.12382	0.901458	0.949297
ENSMUSG00000037318	637.703	-0.247919	0.240874	-1.02925	0.303364	0.498104
ENSMUSG00000026639	931.102	-0.368587	0.874346	-0.421558	0.673348	0.808444
ENSMUSG00000016194	348.054	-1.28548	0.284978	-4.51079	6.46e-06	0.000100432
ENSMUSG00000103089	1.70024	-1.8608	2.45664	-0.757457	0.448776	NA
ENSMUSG00000009633	4983.5	0.00508078	0.245825	0.0206683	0.98351	0.990984
ENSMUSG00000104348	322.541	1.77987	0.37174	4.78795	1.68e-06	3.11e-05
ENSMUSG00000016179	85.0816	0.890277	0.389517	2.28559	0.022278	0.0778321
ENSMUSG00000026640	2606.13	0.211577	0.246117	0.859661	0.389976	0.58491
ENSMUSG00000102523	12.2352	-1.27588	0.765997	-1.66564	0.0957847	0.225364
ENSMUSG00000102621	7.33815	-0.770686	1.23222	-0.625444	0.53168	0.706634
ENSMUSG00000102841	6.74868	-0.449653	1.02093	-0.440437	0.659621	0.800086
ENSMUSG00000016494	3673.18	-1.72273	0.327241	-5.26439	1.41e-07	3.52e-06
ENSMUSG00000097325	19.1301	-1.39338	0.68097	-2.04617	0.04074	0.12102
ENSMUSG00000096929	29.5639	-1.45047	0.565607	-2.56444	0.0103343	0.0432195
ENSMUSG00000104525	5.8701	-1.20499	0.944548	-1.27574	0.202049	0.380789
ENSMUSG00000103867	3.4705	-1.89231	1.3975	-1.35407	0.175714	NA
ENSMUSG00000016493	65.8528	-0.450738	0.495556	-0.90956	0.363055	0.559666
ENSMUSG00000104010	6.03851	-0.510341	1.23411	-0.413528	0.67922	0.81194
ENSMUSG00000103443	19.2264	-1.8902	0.722388	-2.61659	0.0088812	0.0386449
ENSMUSG00000016481	2349.35	-0.291641	0.21762	-1.34014	0.180201	0.350863
ENSMUSG00000097541	8.35111	-1.68913	0.912542	-1.85102	0.0641667	0.169094
ENSMUSG00000040653	2218.98	0.176117	0.283455	0.621324	0.534387	0.709075
ENSMUSG00000019762	36.1782	1.43985	0.655514	2.19653	0.0280542	0.0921756
ENSMUSG00000040624	79.3413	4.86244	0.559245	8.69465	3.48e-18	5.22e-16
ENSMUSG00000040675	3993.5	0.347139	0.214386	1.61922	0.105399	0.241088
ENSMUSG00000082247	2.6573	-0.499808	1.38407	-0.361114	0.718015	NA
ENSMUSG00000038587	99.8352	-1.57286	0.615028	-2.55737	0.0105466	0.0439293
ENSMUSG00000075327	619.201	-0.385557	0.225834	-1.70726	0.0877746	0.211851
ENSMUSG00000095123	162.311	-0.410334	0.409199	-1.00277	0.31597	0.511285
ENSMUSG00000019763	1858.62	0.557996	0.217779	2.56222	0.0104006	0.0434543
ENSMUSG00000085687	91.0187	0.151789	0.463188	0.327704	0.743135	0.853453
ENSMUSG00000061759	1555.58	0.381851	0.176439	2.16421	0.030448	0.0977686
ENSMUSG00000019767	24.5619	-1.43092	0.655269	-2.18371	0.0289838	0.09436
ENSMUSG00000019768	2190.16	0.431511	0.346547	1.24517	0.213068	0.394857
ENSMUSG00000096054	4243.92	1.10116	0.17989	6.12132	9.28e-10	3.84e-08
ENSMUSG00000093189	3.25632	0.278724	1.4963	0.186276	0.852229	NA
ENSMUSG00000096553	16.3854	-1.23705	0.65693	-1.88308	0.0596897	0.160156
ENSMUSG00000019773	311.974	-0.611013	0.348772	-1.7519	0.0797916	0.198686
ENSMUSG00000019774	277.638	-0.156192	0.20298	-0.769491	0.441602	0.630906
ENSMUSG00000019775	310.194	-1.22201	0.446681	-2.73576	0.00622371	0.0294323
ENSMUSG00000064065	1.88514	-0.67889	2.20615	-0.307726	0.758291	NA
ENSMUSG00000081926	1.94077	-0.188586	1.6207	-0.116361	0.907367	NA
ENSMUSG00000015202	1487.19	0.0783738	0.241943	0.323935	0.745987	0.855235
ENSMUSG00000079685	118.825	-0.285205	0.312744	-0.911944	0.361798	0.558181
ENSMUSG00000019796	301.051	-3.19212	0.433877	-7.35721	1.88e-13	1.57e-11
ENSMUSG00000019795	2383.48	0.50041	0.186337	2.68551	0.00724203	0.032963
ENSMUSG00000040034	398.847	-0.0685874	0.184344	-0.372061	0.709847	0.832609
ENSMUSG00000040021	2402.44	-0.110476	0.236743	-0.466648	0.640752	0.787417
ENSMUSG00000019794	957.95	-0.0173813	0.173027	-0.100454	0.919984	0.95913
ENSMUSG00000092190	3.20931	1.40441	1.38365	1.01501	0.310103	NA
ENSMUSG00000040006	1483.56	-0.127316	0.2203	-0.577919	0.563319	0.729305
ENSMUSG00000085211	7.84888	0.20814	0.910109	0.228698	0.819104	0.901267
ENSMUSG00000015757	2067.78	0.0253479	0.158534	0.159889	0.872968	0.933928
ENSMUSG00000081497	4.17361	-0.149448	1.31168	-0.113937	0.909288	0.953727
ENSMUSG00000015755	4990.8	0.54688	0.197867	2.76388	0.00571188	0.0275061
ENSMUSG00000047712	612.575	-0.183833	0.35514	-0.517635	0.604713	0.761145
ENSMUSG00000015305	1071.85	0.640219	0.277164	2.30989	0.0208941	0.0740097
ENSMUSG00000097597	1.87372	1.68832	1.75336	0.962905	0.335595	NA
ENSMUSG00000060487	15.8142	-2.70361	1.38865	-1.94694	NA	NA
ENSMUSG00000019790	1245.21	0.211089	0.178947	1.17961	0.238154	0.424955
ENSMUSG00000019832	187.146	-0.238386	0.374077	-0.637265	0.523952	0.700884
ENSMUSG00000019828	2.77573	3.07943	1.70542	1.80568	0.0709688	NA
ENSMUSG00000090112	1347.97	-0.206734	0.168719	-1.22532	0.220456	0.403435
ENSMUSG00000090070	8.33482	0.353006	0.814023	0.433657	0.664538	0.803146
ENSMUSG00000097007	9.87634	-0.0766319	0.834673	-0.0918107	0.926848	0.962778
ENSMUSG00000047648	1268.75	0.226627	0.188001	1.20546	0.228026	0.412434
ENSMUSG00000055493	93.9011	-0.592142	0.297652	-1.98938	0.0466596	0.133754
ENSMUSG00000045455	5.84165	-0.050833	1.05889	-0.0480058	0.961712	0.979292
ENSMUSG00000019820	6552.47	0.193712	0.195038	0.993198	0.320613	0.515713
ENSMUSG00000097378	9.22925	-0.0137195	0.786274	-0.0174487	0.986079	0.992388
ENSMUSG00000039232	666.987	1.28905	0.251805	5.11923	3.07e-07	6.97e-06
ENSMUSG00000078348	548.712	0.615516	0.212827	2.89209	0.00382685	0.0201845
ENSMUSG00000019817	147.352	2.1987	0.429493	5.11929	3.07e-07	6.97e-06
ENSMUSG00000019814	2033.65	-0.102226	0.174547	-0.585664	0.558101	0.725625
ENSMUSG00000019810	164.166	1.24254	0.327416	3.79499	0.00014765	0.0014411
ENSMUSG00000019809	1175.16	-0.280386	0.18804	-1.4911	0.135936	0.289058
ENSMUSG00000019808	146.732	-0.624526	0.233113	-2.67907	0.0073827	0.03349
ENSMUSG00000019806	238.619	1.01652	0.387963	2.62014	0.00878929	0.0383373
ENSMUSG00000015501	3495.28	1.04795	0.168924	6.20368	5.52e-10	2.45e-08
ENSMUSG00000097300	8.99075	-0.734519	0.917515	-0.800553	0.42339	0.615016
ENSMUSG00000039116	744.905	0.408961	0.254843	1.60476	0.108547	0.24641
ENSMUSG00000071532	54.2231	1.74703	0.505667	3.45491	0.000550481	0.00421058
ENSMUSG00000019868	930.732	0.169979	0.181824	0.934854	0.349863	0.546372
ENSMUSG00000085572	3.72799	0.677657	1.33972	0.505818	0.612984	NA
ENSMUSG00000019865	4.11516	1.87054	1.23679	1.51241	0.13043	0.280841
ENSMUSG00000093798	456.612	-0.102408	0.237847	-0.430564	0.666785	0.804157
ENSMUSG00000101969	3.68961	-1.32303	1.30398	-1.01461	0.310294	NA
ENSMUSG00000039910	964.791	-0.0659527	0.212715	-0.310052	0.756522	0.862399
ENSMUSG00000093672	11.1124	0.319962	0.712954	0.448784	0.653588	0.79678
ENSMUSG00000039891	2222.43	1.60784	0.445493	3.60912	0.000307242	0.00262507
ENSMUSG00000039879	1565.95	0.601666	0.18412	3.2678	0.00108387	0.00738628
ENSMUSG00000078453	1996.66	0.599961	0.208425	2.87854	0.00399515	0.0209109
ENSMUSG00000019854	1211.27	0.251891	0.168851	1.49179	0.135753	0.288778
ENSMUSG00000071392	11.4618	2.21284	0.84015	2.63386	0.00844193	0.0371588
ENSMUSG00000059554	409.306	0.0495607	0.200947	0.246636	0.80519	0.893002
ENSMUSG00000096977	4.51133	0.0587062	1.11237	0.0527756	0.957911	0.977707
ENSMUSG00000039835	715.551	-0.865724	0.20993	-4.12388	3.73e-05	0.00044782
ENSMUSG00000019853	100.121	-2.00024	0.602616	-3.31927	0.00090253	0.00634255
ENSMUSG00000019852	2.33012	3.73052	1.86788	1.99719	0.045804	NA
ENSMUSG00000019851	106.735	-5.47617	0.695292	-7.87606	3.38e-15	3.5e-13
ENSMUSG00000019850	1070.24	1.12905	0.214751	5.2575	1.46e-07	3.64e-06
ENSMUSG00000020009	979.07	0.122456	0.177538	0.689744	0.490355	0.673805
ENSMUSG00000094977	9.29573	-0.688718	0.759286	-0.90706	0.364375	0.560943
ENSMUSG00000020003	380.416	-0.28295	0.205234	-1.37867	0.167996	0.335111
ENSMUSG00000071369	13.1105	1.2253	0.830376	1.47559	0.140053	0.295061
ENSMUSG00000019996	2.32498	-1.77295	1.73663	-1.02091	0.307296	NA
ENSMUSG00000069713	28.065	-0.250322	0.507321	-0.493419	0.621717	0.773191
ENSMUSG00000037608	7465.99	-0.859421	0.167341	-5.13574	2.81e-07	6.46e-06
ENSMUSG00000019992	22.3577	-0.482369	0.502076	-0.96075	0.336678	0.533417
ENSMUSG00000019990	12.0816	-1.44391	0.927591	-1.55663	0.119559	0.264491
ENSMUSG00000019986	976.881	-0.0383662	0.259348	-0.147934	0.882395	0.938839
ENSMUSG00000019982	9.63409	-2.16253	0.886011	-2.44075	0.0146568	0.0563763
ENSMUSG00000019977	3489.27	0.524312	0.158939	3.29883	0.000970881	0.00672617
ENSMUSG00000037542	3.26968	1.80166	1.45236	1.2405	0.21479	NA
ENSMUSG00000050844	1.82087	-0.659705	1.74152	-0.37881	0.704829	NA
ENSMUSG00000019970	2671.59	-1.64644	0.215653	-7.63465	2.26e-14	2.13e-12
ENSMUSG00000097327	24.4262	0.887452	0.524799	1.69103	0.0908303	0.21699
ENSMUSG00000044268	12.2665	0.383431	0.66314	0.578206	0.563125	0.729243
ENSMUSG00000053219	327.882	-0.711046	0.199068	-3.57188	0.000354431	0.00293302
ENSMUSG00000097352	158.949	-0.802939	0.365242	-2.19837	0.0279225	0.0918844
ENSMUSG00000097245	52.592	0.341798	0.400285	0.853888	0.393167	0.58786
ENSMUSG00000078452	25.3769	1.32896	0.666349	1.99438	0.0461102	0.132713
ENSMUSG00000037490	7.37576	-0.235126	0.847198	-0.277534	0.78137	0.878836
ENSMUSG00000071359	2171.78	0.31746	0.204762	1.55039	0.121049	0.266342
ENSMUSG00000098714	4.70037	-0.720081	1.12005	-0.6429	0.520289	0.698113
ENSMUSG00000010461	3581.18	0.524475	0.179864	2.91595	0.00354603	0.0190439
ENSMUSG00000094033	2.21906	-0.996094	1.98384	-0.502103	0.615595	NA
ENSMUSG00000061983	37881.6	0.63442	0.235236	2.69695	0.00699785	0.0321079
ENSMUSG00000070063	37.6852	-0.90941	0.450633	-2.01807	0.0435836	0.127107
ENSMUSG00000080486	17.0615	-0.448304	0.618758	-0.724522	0.468745	0.654143
ENSMUSG00000077440	252.182	-1.11082	0.381283	-2.91338	0.00357544	0.0191538
ENSMUSG00000037455	188.801	-1.01922	0.264296	-3.85635	0.000115092	0.00117683
ENSMUSG00000019998	3424.7	0.363126	0.158872	2.28565	0.0222748	0.0778321
ENSMUSG00000087400	4.44417	0.770085	1.09433	0.703702	0.481618	0.666101
ENSMUSG00000019997	407.107	0.0391756	0.956304	0.0409657	0.967323	0.98237
ENSMUSG00000037370	1435.65	0.432777	0.260057	1.66416	0.0960798	0.225903
ENSMUSG00000019989	430.902	-1.79915	0.262055	-6.86553	6.62e-12	4.24e-10
ENSMUSG00000019984	1436.09	-0.501828	0.180111	-2.78621	0.00533279	0.0260919
ENSMUSG00000019987	2.51477	-0.429358	1.75944	-0.244031	0.807207	NA
ENSMUSG00000039166	1242.82	-0.00583328	0.207362	-0.0281309	0.977558	0.987946
ENSMUSG00000089048	1.85044	-1.26781	2.21085	-0.57345	0.56634	NA
ENSMUSG00000019978	8278.07	-0.136219	0.280609	-0.485439	0.627365	0.777389
ENSMUSG00000096546	9.06116	0.300592	0.955677	0.314533	0.753116	0.860178
ENSMUSG00000049420	65.5677	3.165	0.645877	4.90032	9.57e-07	1.89e-05
ENSMUSG00000051354	2.51301	-0.459336	1.59827	-0.287395	0.77381	NA
ENSMUSG00000039089	435.118	0.35877	0.219797	1.63227	0.102622	0.236601
ENSMUSG00000039031	886.16	1.20352	0.315651	3.8128	0.000137401	0.00135461
ENSMUSG00000019899	6899.11	2.2352	0.266781	8.37839	5.37e-17	6.65e-15
ENSMUSG00000101636	2.49749	2.19381	2.18359	1.00468	0.315049	NA
ENSMUSG00000103931	18.9277	1.10193	0.705768	1.56133	0.118447	0.262745
ENSMUSG00000064208	15.7397	0.344098	0.58268	0.590544	0.554826	0.72318
ENSMUSG00000019889	5805.25	1.06046	0.237912	4.45736	8.3e-06	0.000125381
ENSMUSG00000049109	5.55565	0.023141	1.32862	0.0174173	0.986104	0.992388
ENSMUSG00000095478	13.2195	0.153712	0.673933	0.228082	0.819583	0.901425
ENSMUSG00000038916	13.6153	-2.91254	0.91698	-3.17623	0.00149204	0.00955056
ENSMUSG00000004360	1422.65	2.39886	0.369507	6.49206	8.47e-11	4.4e-09
ENSMUSG00000019883	446.667	-0.373007	0.22045	-1.69203	0.0906407	0.216628
ENSMUSG00000038876	1412.21	0.349451	0.183599	1.90334	0.0569956	0.154944
ENSMUSG00000096841	4.90831	-1.27078	1.17887	-1.07796	0.28105	0.473305
ENSMUSG00000019880	745.826	5.87364	0.99901	5.87946	4.12e-09	1.49e-07
ENSMUSG00000069682	410.294	0.839186	0.260202	3.22514	0.00125913	0.00834137
ENSMUSG00000075266	86.2164	1.04577	0.332443	3.1457	0.00165692	0.0103968
ENSMUSG00000019792	377.811	0.509758	0.203976	2.4991	0.0124508	0.0496821
ENSMUSG00000019791	221.72	0.0652071	0.234876	0.277624	0.781301	0.878833
ENSMUSG00000039697	326.586	-0.527752	0.195141	-2.70446	0.00684163	0.031603
ENSMUSG00000019789	5.79594	3.08036	1.30173	2.36636	0.017964	0.0659962
ENSMUSG00000039684	13.06	0.222982	0.663954	0.33584	0.736992	0.849649
ENSMUSG00000000295	659.407	1.87192	0.245732	7.61772	2.58e-14	2.4e-12
ENSMUSG00000000296	152.141	2.33748	1.59179	1.46847	0.141978	0.297869
ENSMUSG00000063760	3488.26	0.481277	0.154847	3.10809	0.00188299	0.0115443
ENSMUSG00000098068	11.7585	-1.02093	0.88115	-1.15864	0.246604	0.434987
ENSMUSG00000069670	220.247	8.48547	0.801456	10.5876	3.4e-26	1.21e-23
ENSMUSG00000019787	12265.1	3.2184	1.30052	2.4747	0.0133348	0.0524229
ENSMUSG00000019785	3.02792	4.13206	1.7261	2.39388	0.0166713	NA
ENSMUSG00000071343	14.9166	-0.12726	0.624159	-0.203891	0.838439	0.912715
ENSMUSG00000039552	8.53111	0.845377	1.02766	0.822625	0.410722	0.603452
ENSMUSG00000039531	404.692	0.0171468	0.204484	0.0838538	0.933173	0.966159
ENSMUSG00000090666	1.73449	-0.526958	2.00529	-0.262783	0.792717	NA
ENSMUSG00000019782	2448.53	0.519592	0.161925	3.20885	0.00133269	0.00872726
ENSMUSG00000049872	23.726	1.30999	0.581955	2.25102	0.0243842	0.0833518
ENSMUSG00000039497	2652.23	0.124597	0.231555	0.538088	0.590516	0.750597
ENSMUSG00000047514	2166.51	0.491991	0.200405	2.45499	0.0140889	0.0546341
ENSMUSG00000039480	478.664	-1.05774	0.179098	-5.90591	3.51e-09	1.3e-07
ENSMUSG00000097274	8.26138	-0.306589	0.892778	-0.34341	0.73129	0.846382
ENSMUSG00000039485	252.326	-0.786307	0.292521	-2.68804	0.00718731	0.0327837
ENSMUSG00000039462	13.3347	-0.488817	0.707687	-0.690725	0.489739	0.673326
ENSMUSG00000019779	487.841	-0.354131	0.234679	-1.50901	0.131297	0.282141
ENSMUSG00000063953	24.891	0.0645687	0.478401	0.134968	0.892637	0.944077
ENSMUSG00000044499	3.41824	2.70738	1.53446	1.76439	0.0776669	NA
ENSMUSG00000019777	6006.72	0.400953	0.176133	2.27643	0.0228204	0.0792898
ENSMUSG00000069662	5001.32	-0.735073	0.326653	-2.25032	0.0244288	0.0834207
ENSMUSG00000046463	67.7696	-0.491034	0.409981	-1.1977	0.231034	0.416114
ENSMUSG00000019846	1129.27	0.538599	0.802862	0.670849	0.502317	0.683542
ENSMUSG00000051736	61.4303	-0.623049	0.361939	-1.72142	0.085175	0.207479
ENSMUSG00000019845	82.1346	0.378683	0.302024	1.25382	0.209909	0.390652
ENSMUSG00000019843	5167.11	0.748492	0.209577	3.57144	0.000355025	0.00293504
ENSMUSG00000085799	2.83765	0.139827	1.5744	0.0888133	0.92923	NA
ENSMUSG00000087014	11.84	0.0982607	0.692367	0.14192	0.887143	0.941401
ENSMUSG00000086915	13.1391	0.841731	0.748857	1.12402	0.261004	0.451458
ENSMUSG00000019842	72.9976	0.923051	0.417401	2.21143	0.0270064	0.0898375
ENSMUSG00000087177	190.499	1.4111	0.292121	4.83052	1.36e-06	2.6e-05
ENSMUSG00000019841	1801.32	0.628483	0.15648	4.01637	5.91e-05	0.000665659
ENSMUSG00000096924	9.77063	-0.445529	0.730257	-0.6101	0.541796	0.714858
ENSMUSG00000096687	193.674	-1.59059	0.248103	-6.41099	1.45e-10	7.11e-09
ENSMUSG00000097890	1.67695	-4.08577	2.12905	-1.91905	0.0549775	NA
ENSMUSG00000071335	3.22584	0.258654	1.26239	0.204893	0.837656	NA
ENSMUSG00000038528	2.2426	-0.593436	1.75008	-0.33909	0.734542	NA
ENSMUSG00000038522	3.15333	3.25835	1.5552	2.09513	0.0361596	NA
ENSMUSG00000019838	29.267	0.226518	0.537686	0.421282	0.673549	0.808552
ENSMUSG00000102632	9.67097	-1.94565	0.894405	-2.17535	0.0296036	0.0958489
ENSMUSG00000038510	2886.79	-0.123683	0.181419	-0.681752	0.495396	0.677897
ENSMUSG00000019837	792.505	-0.490304	0.173552	-2.82511	0.00472639	0.023757
ENSMUSG00000075232	2231.16	-0.394322	0.215658	-1.82846	0.06748	0.175604
ENSMUSG00000038481	1004.6	-0.472078	0.232259	-2.03255	0.0420981	0.123961
ENSMUSG00000063428	18.5811	-4.31003	0.841419	-5.12233	3.02e-07	6.87e-06
ENSMUSG00000045555	11.9485	-5.05698	1.41633	-3.57049	0.00035632	0.00294154
ENSMUSG00000038446	821.586	-0.272086	0.171667	-1.58496	0.112974	0.253644
ENSMUSG00000019831	51.8811	-1.43107	0.454732	-3.14706	0.00164919	0.0103711
ENSMUSG00000038417	1760.11	-0.460424	0.156995	-2.93274	0.00335988	0.0182582
ENSMUSG00000091415	2.76474	-0.28155	1.3219	-0.212988	0.831336	NA
ENSMUSG00000019826	598.417	-0.188455	0.175837	-1.07176	0.283828	0.476203
ENSMUSG00000019823	2673.32	-0.153717	0.176719	-0.869838	0.384389	0.579548
ENSMUSG00000019822	791.036	0.49561	0.212324	2.33421	0.0195846	0.0706143
ENSMUSG00000078451	29.9728	1.71674	0.497745	3.44905	0.000562572	0.00428935
ENSMUSG00000019818	26847.4	1.08873	0.255576	4.25988	2.05e-05	0.000273751
ENSMUSG00000075225	217.642	0.654699	0.366135	1.78814	0.0737539	0.18762
ENSMUSG00000090708	5.12482	-1.22512	1.29307	-0.947448	0.343411	0.540241
ENSMUSG00000091370	3.92102	0.634354	1.39951	0.45327	0.650354	NA
ENSMUSG00000101176	5.66056	-1.3232	1.19535	-1.10696	0.268313	0.459363
ENSMUSG00000100181	12.3656	0.281794	0.766952	0.367421	0.713305	0.835062
ENSMUSG00000019813	548.764	0.0858618	0.189737	0.45253	0.650887	0.795472
ENSMUSG00000038332	1597.87	-0.22004	0.289501	-0.760067	0.447214	0.636353
ENSMUSG00000071324	52.6643	0.686905	0.532179	1.29074	0.196793	0.37313
ENSMUSG00000085666	358.928	0.181005	0.234779	0.770958	0.440732	0.630169
ENSMUSG00000048756	3754.33	0.427378	0.176599	2.42005	0.0155185	0.0590007
ENSMUSG00000038302	532.561	-0.239534	0.213751	-1.12062	0.262448	0.453058
ENSMUSG00000019804	5005.97	0.0187704	0.169451	0.110772	0.911797	0.955187
ENSMUSG00000038280	1475.81	0.0389005	0.318094	0.122292	0.902667	0.949694
ENSMUSG00000019802	4230.9	-0.142432	0.177673	-0.801653	0.422754	0.61448
ENSMUSG00000097008	13.474	-0.0167744	0.708048	-0.023691	0.981099	0.98972
ENSMUSG00000044770	181.054	-1.97917	0.283836	-6.97293	3.1e-12	2.1e-10
ENSMUSG00000038248	451.471	-0.893474	0.261837	-3.41233	0.000644098	0.00481315
ENSMUSG00000099893	4.55247	-4.50597	1.62912	-2.76589	0.00567675	0.0273678
ENSMUSG00000045008	23.7536	-1.06426	0.654207	-1.6268	0.10378	0.238404
ENSMUSG00000038240	458.186	0.560596	0.249178	2.24978	0.0244628	0.0835003
ENSMUSG00000094955	5.44855	1.18792	1.0004	1.18745	0.235052	0.420869
ENSMUSG00000038214	325.491	-0.658469	0.201177	-3.27307	0.00106385	0.00727011
ENSMUSG00000045886	8.61745	1.08933	0.769659	1.41533	0.156971	0.319821
ENSMUSG00000019797	2127.4	0.781519	0.199717	3.91313	9.11e-05	0.000959615
ENSMUSG00000047139	1300.11	-0.0129727	0.425149	-0.0305133	0.975658	0.986992
ENSMUSG00000019863	285.527	0.891421	0.254259	3.50595	0.000454981	0.00358308
ENSMUSG00000019864	380.528	0.156413	0.2244	0.697028	0.485785	0.669947
ENSMUSG00000019866	1097.2	-1.6414	0.318321	-5.15643	2.52e-07	5.87e-06
ENSMUSG00000038160	1309.39	-0.0183895	0.183524	-0.100202	0.920184	0.959155
ENSMUSG00000038151	12.412	-1.41168	0.795471	-1.77465	0.0759557	0.191682
ENSMUSG00000019849	5984.99	-0.36278	0.148527	-2.44251	0.0145854	0.0562027
ENSMUSG00000019848	5850.93	-0.531576	0.258156	-2.05912	0.0394824	0.118263
ENSMUSG00000090088	18.3707	-0.260623	0.578219	-0.450734	0.652181	0.796371
ENSMUSG00000071317	4090.73	0.246321	0.273876	0.899389	0.368445	0.564516
ENSMUSG00000063804	3.74735	-1.65845	1.33397	-1.24324	0.213778	NA
ENSMUSG00000038822	610.506	-0.295417	0.193226	-1.52887	0.126296	0.274428
ENSMUSG00000056073	270.232	0.636071	0.276266	2.30239	0.0213135	0.0751219
ENSMUSG00000038774	3479.77	0.455423	0.201257	2.26289	0.0236425	0.081517
ENSMUSG00000019913	28.2954	5.89146	1.01937	5.77951	7.49e-09	2.59e-07
ENSMUSG00000089672	14.6429	4.47877	1.03662	4.32054	1.56e-05	0.000216099
ENSMUSG00000062593	16.2615	2.42852	0.818025	2.96877	0.00298998	0.0166918
ENSMUSG00000049641	28.926	2.61345	0.601312	4.34626	1.38e-05	0.000194796
ENSMUSG00000019893	6.53937	2.13494	0.947693	2.25278	0.0242729	0.0830405
ENSMUSG00000019891	274.259	1.01863	0.212821	4.78631	1.7e-06	3.13e-05
ENSMUSG00000019861	1520.98	-0.0152953	0.181309	-0.0843603	0.93277	0.965918
ENSMUSG00000089800	2.41422	-0.383929	1.61184	-0.238193	0.811731	NA
ENSMUSG00000038624	1.91046	1.48443	2.20386	0.673558	0.500593	NA
ENSMUSG00000023068	2098.5	0.484193	0.171204	2.82816	0.00468161	0.0236199
ENSMUSG00000049576	2.54566	0.415593	1.35193	0.307407	0.758534	NA
ENSMUSG00000038594	254.774	0.574476	0.222029	2.5874	0.00967036	0.0410552
ENSMUSG00000038583	14.6762	0.340084	0.87051	0.390672	0.696039	0.823407
ENSMUSG00000058298	180.338	-0.629826	0.239904	-2.62532	0.00865663	0.0379185
ENSMUSG00000019857	740.487	0.0324197	0.169783	0.190948	0.848566	0.91877
ENSMUSG00000003746	636.721	-0.354411	0.300133	-1.18085	0.237664	0.42417
ENSMUSG00000097069	1.94458	-0.801927	1.53267	-0.523221	0.60082	NA
ENSMUSG00000038122	658.009	-0.418097	0.200308	-2.08727	0.0368635	0.112358
ENSMUSG00000047669	7.19292	-0.000458606	0.884531	-0.000518473	0.999586	0.99988
ENSMUSG00000071303	16.795	0.679671	0.654221	1.0389	0.29885	0.493754
ENSMUSG00000050953	3305.66	-0.634217	0.296641	-2.138	0.032517	0.10262
ENSMUSG00000019878	1790.68	0.537791	0.152754	3.52064	0.000430514	0.00342668
ENSMUSG00000019877	12351.9	-0.105685	0.197576	-0.534906	0.592715	0.752329
ENSMUSG00000019876	4.37175	-0.741203	1.43405	-0.516859	0.605255	0.761578
ENSMUSG00000019872	245.266	3.0496	0.265203	11.4991	1.33e-30	7.35e-28
ENSMUSG00000038039	1254.99	-0.418153	0.167214	-2.50072	0.0123943	0.0495457
ENSMUSG00000019920	10064.5	0.192206	0.19304	0.995679	0.319406	0.514642
ENSMUSG00000070214	2.21431	-1.0507	1.56176	-0.67277	0.501094	NA
ENSMUSG00000003226	10137.9	0.0548222	0.185388	0.295716	0.767447	0.869696
ENSMUSG00000038010	78.2638	-0.469072	0.369073	-1.27095	0.203747	0.382852
ENSMUSG00000055958	7.12542	-1.5619	1.15206	-1.35574	0.175183	0.344613
ENSMUSG00000037990	212.772	-1.18145	0.954245	-1.2381	0.215681	0.397716
ENSMUSG00000019917	3421.93	-0.178346	0.247275	-0.721246	0.470758	0.6561
ENSMUSG00000019916	9530.13	0.0706781	0.193661	0.364958	0.715143	0.836412
ENSMUSG00000069622	8.53509	0.457079	0.820974	0.556753	0.577696	0.740964
ENSMUSG00000009654	3.00763	1.32016	1.65913	0.795696	0.426209	NA
ENSMUSG00000009647	6731.46	1.08906	0.284402	3.82929	0.000128512	0.00128475
ENSMUSG00000071280	2.08039	1.15566	1.65214	0.699497	0.484242	NA
ENSMUSG00000020111	13818.2	1.07022	0.208541	5.13196	2.87e-07	6.57e-06
ENSMUSG00000091184	12.4401	0.0130701	0.664578	0.0196668	0.984309	0.99138
ENSMUSG00000020109	2090.82	-0.0138508	0.172523	-0.0802837	0.936012	0.96715
ENSMUSG00000020108	1824.76	-0.965065	0.189464	-5.09367	3.51e-07	7.89e-06
ENSMUSG00000020107	2099.91	-0.0116425	0.18195	-0.0639873	0.94898	0.973214
ENSMUSG00000044475	699.833	0.0853686	0.210909	0.404765	0.68565	0.816568
ENSMUSG00000058297	2533.33	0.711497	0.231793	3.06953	0.00214393	0.0128
ENSMUSG00000057337	589.567	-0.0226591	0.344829	-0.0657113	0.947608	0.9726
ENSMUSG00000004207	29840.3	0.377086	0.180549	2.08855	0.0367485	0.112147
ENSMUSG00000012819	172.492	0.190552	0.339017	0.562072	0.574067	0.738247
ENSMUSG00000020101	385.565	0.122697	0.37395	0.32811	0.742829	0.85322
ENSMUSG00000090439	139.916	-1.23743	0.587583	-2.10597	0.035207	0.108782
ENSMUSG00000020100	220.368	-1.50739	0.279191	-5.39912	6.7e-08	1.82e-06
ENSMUSG00000020099	6465.44	0.00395512	0.298097	0.0132679	0.989414	0.99418
ENSMUSG00000037247	5.2498	1.13321	1.23634	0.916586	0.359359	0.55551
ENSMUSG00000098055	8.43492	-0.57533	1.05469	-0.545496	0.585413	0.746815
ENSMUSG00000020097	5062.76	-0.287472	0.178714	-1.60856	0.107713	0.244842
ENSMUSG00000059901	1164.22	0.686229	0.395588	1.73471	0.0827928	0.203648
ENSMUSG00000061488	1.87237	1.06541	1.60593	0.663423	0.50706	NA
ENSMUSG00000020092	1482.28	-0.357578	0.253914	-1.40826	0.159053	0.322843
ENSMUSG00000020091	244.821	0.233001	0.206484	1.12842	0.259142	0.449147
ENSMUSG00000043126	24.0447	0.349145	0.549276	0.635646	0.525007	0.701759
ENSMUSG00000037151	843.765	0.545482	0.240222	2.27074	0.0231625	0.0802502
ENSMUSG00000020089	2443.65	0.357726	0.230122	1.55451	0.120063	0.265106
ENSMUSG00000020088	8164.66	0.301442	0.174083	1.7316	0.0833446	0.204535
ENSMUSG00000020087	201.292	0.147223	0.241571	0.609442	0.542231	0.715111
ENSMUSG00000020085	1196.56	0.436545	0.266515	1.63797	0.101427	0.234796
ENSMUSG00000020086	109.095	1.50777	0.405068	3.72228	0.000197434	0.00182744
ENSMUSG00000058806	2.58694	-2.61339	1.7821	-1.46646	0.142522	NA
ENSMUSG00000046687	16.896	-1.79453	0.608991	-2.94672	0.00321162	0.0176355
ENSMUSG00000020083	31.6681	-1.14532	0.571659	-2.0035	0.0451238	0.130489
ENSMUSG00000044312	45.4797	-22.874	3.90766	-5.85362	NA	NA
ENSMUSG00000037031	1801.06	-0.823339	0.305629	-2.69392	0.00706179	0.0323665
ENSMUSG00000099185	2.60711	-1.40359	1.50692	-0.93143	0.351631	NA
ENSMUSG00000020081	1.79803	-3.07184	2.09273	-1.46786	0.142141	NA
ENSMUSG00000037012	7751.04	0.675152	0.188316	3.58521	0.000336806	0.00281853
ENSMUSG00000085347	7.18378	-2.30121	1.14703	-2.00623	0.0448316	0.129908
ENSMUSG00000020079	1732.63	0.0412752	0.164661	0.250667	0.802072	0.890815
ENSMUSG00000097129	9.92616	-0.91879	0.745302	-1.23278	0.21766	0.400038
ENSMUSG00000020078	5391.58	-0.164885	0.166193	-0.992133	0.321133	0.516234
ENSMUSG00000020077	55.6025	0.243468	0.373658	0.651578	0.514673	0.693515
ENSMUSG00000036955	1514.2	-0.00989411	0.165383	-0.0598255	0.952295	0.975039
ENSMUSG00000105203	3.88407	-0.538389	1.12688	-0.477771	0.632813	NA
ENSMUSG00000020075	6437.01	-0.358847	0.187179	-1.91714	0.0552207	0.151906
ENSMUSG00000020076	5853.35	0.599176	0.20678	2.89764	0.0037598	0.0199106
ENSMUSG00000020074	4110.48	-0.7027	0.220202	-3.19116	0.00141701	0.00916025
ENSMUSG00000080469	7.74218	0.0110079	0.902663	0.0121949	0.99027	0.994457
ENSMUSG00000047146	241.524	0.11147	0.280649	0.397186	0.691231	0.820074
ENSMUSG00000071253	1060.71	-0.0540755	0.164787	-0.328154	0.742795	0.85322
ENSMUSG00000088875	1.53794	-1.02984	2.03984	-0.504863	0.613655	NA
ENSMUSG00000036875	67.7346	-0.173101	0.3526	-0.490929	0.623477	0.774366
ENSMUSG00000020070	511.965	-1.16331	0.246786	-4.71384	2.43e-06	4.32e-05
ENSMUSG00000084985	3.92097	-1.36916	1.44308	-0.948782	0.342731	NA
ENSMUSG00000020069	764.365	0.4412	0.2032	2.17127	0.029911	0.096479
ENSMUSG00000020072	35.8898	-0.243124	0.438405	-0.554565	0.579192	0.742366
ENSMUSG00000020067	577.481	0.955774	0.28906	3.30649	0.000944735	0.00658236
ENSMUSG00000045391	7.03007	-0.925564	1.12374	-0.823645	0.410141	0.602859
ENSMUSG00000020064	3239.92	0.357229	0.190504	1.87518	0.0607679	0.162209
ENSMUSG00000096991	32.5413	0.46707	0.512872	0.910695	0.362456	0.558844
ENSMUSG00000020063	788.334	-0.384377	0.164336	-2.33897	0.0193371	0.0699282
ENSMUSG00000036764	20.1031	-0.738176	0.838969	-0.879861	0.378935	0.574566
ENSMUSG00000060843	36.4285	8.75482	1.26202	6.93718	4e-12	2.68e-10
ENSMUSG00000097134	1.86675	-0.0667687	1.72151	-0.0387849	0.969062	NA
ENSMUSG00000097921	7.77194	0.69	0.911337	0.75713	0.448972	0.637845
ENSMUSG00000019873	3125.17	-0.512093	0.189332	-2.70473	0.00683599	0.031594
ENSMUSG00000037876	3809.6	-0.271804	0.18799	-1.44585	0.148221	0.307151
ENSMUSG00000089498	2.98114	1.91517	1.35995	1.40826	0.159054	NA
ENSMUSG00000075000	662.987	0.897213	0.220826	4.06299	4.84e-05	0.000560689
ENSMUSG00000037868	133.266	-1.97955	0.547595	-3.61499	0.00030036	0.00258044
ENSMUSG00000057134	1944.8	0.215344	0.154406	1.39467	0.163116	0.328479
ENSMUSG00000037855	1286.64	0.91889	0.23153	3.96878	7.22e-05	0.000787581
ENSMUSG00000037846	330.702	1.91439	0.292188	6.55189	5.68e-11	3.04e-09
ENSMUSG00000086838	2.78555	2.42612	1.66345	1.45849	0.144705	NA
ENSMUSG00000019947	1225.56	0.554994	0.176572	3.14316	0.00167135	0.0104566
ENSMUSG00000019944	1221.59	-0.519793	0.232771	-2.23306	0.0255447	0.0862498
ENSMUSG00000090622	147.908	-0.682578	0.245855	-2.77635	0.00549738	0.0266911
ENSMUSG00000019942	934.992	-0.0423427	0.268777	-0.157538	0.874821	0.934887
ENSMUSG00000069601	765.733	1.17222	0.243384	4.81636	1.46e-06	2.75e-05
ENSMUSG00000048701	2274.32	0.156798	0.173166	0.905477	0.365213	0.561676
ENSMUSG00000019933	132.917	-0.0815607	0.368093	-0.221576	0.824644	0.903679
ENSMUSG00000037762	21.3533	-2.51251	0.639568	-3.92845	8.55e-05	0.000910917
ENSMUSG00000043259	667.901	0.226072	0.199408	1.13371	0.256914	0.446961
ENSMUSG00000037747	4.12986	-0.676055	1.19639	-0.565078	0.572021	0.736501
ENSMUSG00000094703	5.85824	-4.88045	1.50628	-3.24008	0.00119498	0.00799378
ENSMUSG00000014329	644.752	-0.704575	0.340887	-2.06689	0.0387448	0.116822
ENSMUSG00000003923	1614.75	0.310509	0.1878	1.65341	0.0982484	0.229717
ENSMUSG00000019927	1167.84	0.116325	0.262813	0.442615	0.658044	0.798989
ENSMUSG00000037710	1067.67	0.572306	0.262526	2.18	0.0292577	0.0950168
ENSMUSG00000060733	1121.75	-0.0862129	0.170925	-0.504391	0.613986	0.767207
ENSMUSG00000053830	5.26915	1.32555	1.00309	1.32147	0.186345	0.358865
ENSMUSG00000019923	1628.78	-0.0804759	0.161873	-0.497156	0.619079	0.771312
ENSMUSG00000052613	40.1251	4.14272	0.699859	5.91937	3.23e-09	1.22e-07
ENSMUSG00000085456	59.1207	4.2058	1.58149	2.6594	0.00782806	0.0351256
ENSMUSG00000072407	5.24819	-0.88668	1.08815	-0.814852	0.415157	0.608089
ENSMUSG00000040009	121.399	-0.669494	0.331876	-2.0173	0.0436638	0.127223
ENSMUSG00000020175	45.16	-0.783746	0.498752	-1.57141	0.116087	0.258786
ENSMUSG00000009681	1297	-0.594947	0.197694	-3.00944	0.00261729	0.0150079
ENSMUSG00000033444	4794.4	-0.102825	0.15823	-0.649847	0.515791	0.694475
ENSMUSG00000020178	72.2885	2.37137	0.430633	5.50669	3.66e-08	1.08e-06
ENSMUSG00000033416	904.733	-0.00245298	0.202921	-0.0120884	0.990355	0.994483
ENSMUSG00000033427	8.26981	2.53059	0.911007	2.7778	0.00547291	0.0266101
ENSMUSG00000020180	1557.99	-0.153982	0.170364	-0.90384	0.36608	0.562555
ENSMUSG00000046807	149.848	-2.73938	0.305292	-8.97297	2.89e-19	5.2e-17
ENSMUSG00000006344	7.6803	-1.49005	1.30306	-1.1435	0.252829	0.442283
ENSMUSG00000006342	5.53971	-0.658545	0.941671	-0.699337	0.484342	0.668617
ENSMUSG00000020196	1887.74	0.000149369	0.156119	0.000956761	0.999237	0.99988
ENSMUSG00000001666	258.177	-0.022505	0.281283	-0.0800083	0.936231	0.96715
ENSMUSG00000001665	6.27586	-4.03485	1.39094	-2.90082	0.00372192	0.0197835
ENSMUSG00000001663	45.3449	-1.18396	0.418633	-2.82816	0.00468159	0.0236199
ENSMUSG00000033318	14.7595	5.6e-05	0.658517	8.51e-05	0.999932	0.999974
ENSMUSG00000033307	6436.13	0.580966	0.237963	2.44141	0.0146299	0.056298
ENSMUSG00000009092	14.238	-0.225351	0.731824	-0.30793	0.758135	0.863356
ENSMUSG00000000902	2363.32	-0.134626	0.215878	-0.623623	0.532875	0.707886
ENSMUSG00000000901	3871.05	1.49491	0.274393	5.44807	5.09e-08	1.45e-06
ENSMUSG00000049422	854.704	1.07422	0.241339	4.45109	8.54e-06	0.000128529
ENSMUSG00000050157	194.453	3.40175	0.508313	6.69225	2.2e-11	1.27e-09
ENSMUSG00000000903	2.62506	2.96842	1.6849	1.76178	0.0781068	NA
ENSMUSG00000049764	651.444	0.109998	0.213532	0.515137	0.606457	0.762417
ENSMUSG00000020230	918.907	-0.125694	0.171144	-0.734433	0.462685	0.649126
ENSMUSG00000033208	2.5652	-0.93355	1.49692	-0.623648	0.532859	NA
ENSMUSG00000020231	636.177	-0.0208958	0.198901	-0.105056	0.916331	0.957237
ENSMUSG00000001151	1211.46	0.285344	0.167793	1.70057	0.0890241	0.2139
ENSMUSG00000033126	275.033	-0.19951	0.246595	-0.809057	0.418482	0.610532
ENSMUSG00000001150	1589.57	-0.551624	0.154278	-3.57551	0.000349541	0.00289956
ENSMUSG00000033105	1500.13	0.321808	0.206783	1.55626	0.119647	0.264551
ENSMUSG00000086241	2.4754	-0.474977	1.61072	-0.294884	0.768082	NA
ENSMUSG00000001155	2.37325	1.63981	1.7679	0.927543	0.353645	NA
ENSMUSG00000020241	26648	-1.65281	0.306327	-5.39556	6.83e-08	1.84e-06
ENSMUSG00000001119	66771.2	-0.974102	0.275735	-3.53274	0.000411276	0.00330121
ENSMUSG00000001120	201.097	-0.250462	0.320522	-0.781421	0.434555	0.625415
ENSMUSG00000001436	555.566	-0.00832756	0.185339	-0.0449316	0.964162	0.980732
ENSMUSG00000001435	11490.8	0.181696	0.307241	0.591381	0.554265	0.722801
ENSMUSG00000078444	6.12915	-0.890662	0.989556	-0.900062	0.368087	0.564077
ENSMUSG00000020260	4656.73	0.318265	0.160171	1.98704	0.046918	0.13427
ENSMUSG00000020262	1218.76	-1.82113	0.248714	-7.32218	2.44e-13	2.02e-11
ENSMUSG00000032977	682.506	-0.0749024	0.214523	-0.349158	0.726971	0.843898
ENSMUSG00000097811	9.38911	-0.623014	0.802082	-0.776746	0.437308	0.627755
ENSMUSG00000000290	227.931	0.902851	0.40606	2.22344	0.0261859	0.0877396
ENSMUSG00000009291	11004.5	0.134412	0.30144	0.445898	0.655671	0.797841
ENSMUSG00000020265	2870.29	0.231211	0.16654	1.38833	0.165038	0.331062
ENSMUSG00000009293	3840.17	0.032433	0.228625	0.141861	0.88719	0.941401
ENSMUSG00000020284	480.578	-0.026148	0.231379	-0.11301	0.910023	0.954205
ENSMUSG00000020277	2469.44	-0.959088	0.186668	-5.13793	2.78e-07	6.39e-06
ENSMUSG00000053329	2101.84	0.320129	0.24777	1.29204	0.196343	0.372581
ENSMUSG00000032834	1236.89	0.00593563	0.201096	0.0295164	0.976453	0.987388
ENSMUSG00000000374	2985.08	-0.00594565	0.172462	-0.0344751	0.972498	0.985053
ENSMUSG00000001211	5214.94	0.618371	0.274113	2.25589	0.0240772	0.0825917
ENSMUSG00000064317	10.6013	0.590211	0.848963	0.695214	0.486921	0.670905
ENSMUSG00000061032	7479.17	0.362495	0.168012	2.15755	0.0309625	0.0990587
ENSMUSG00000098376	2.03581	-0.38993	1.6637	-0.234375	0.814694	NA
ENSMUSG00000005054	1254.53	-0.0609056	0.196597	-0.309799	0.756714	0.862503
ENSMUSG00000032788	429.207	-0.332792	0.186003	-1.78918	0.0735858	0.187277
ENSMUSG00000032763	1214.25	0.300656	0.184645	1.6283	0.103462	0.238025
ENSMUSG00000032714	881.196	-0.102143	0.277443	-0.368158	0.712755	0.834659
ENSMUSG00000005357	6.78469	1.18041	1.41204	0.835964	0.403175	0.596309
ENSMUSG00000060301	1722.95	-0.0735657	0.192275	-0.382606	0.702012	0.827674
ENSMUSG00000052151	597.667	-0.0748414	0.204629	-0.365741	0.714558	0.836034
ENSMUSG00000042570	1018.39	0.432202	0.194833	2.21832	0.026533	0.0885899
ENSMUSG00000045912	3.59732	-0.599711	1.39336	-0.430406	0.666901	NA
ENSMUSG00000020312	1036.03	-3.82885	0.309961	-12.3527	4.71e-35	2.88e-32
ENSMUSG00000035963	3.17161	-5.01026	2.14877	-2.33168	0.0197174	NA
ENSMUSG00000020308	339.115	-0.265571	0.245638	-1.08115	0.279631	0.471752
ENSMUSG00000020307	4176.74	0.721932	0.265088	2.72337	0.006462	0.0302249
ENSMUSG00000054206	73.4275	0.740988	0.320181	2.31428	0.0206524	0.0733663
ENSMUSG00000023175	18444.7	0.222868	0.247346	0.90104	0.367567	0.563726
ENSMUSG00000020331	13.411	-1.74254	1.046	-1.66591	0.095732	0.225302
ENSMUSG00000020329	1560.07	0.212841	0.163428	1.30236	0.192795	0.367725
ENSMUSG00000020327	2.76521	0.457662	1.8052	0.253524	0.799864	NA
ENSMUSG00000035890	1210.5	0.27492	0.217284	1.26526	0.20578	0.385442
ENSMUSG00000020325	129.379	0.146906	0.451442	0.325416	0.744867	0.854582
ENSMUSG00000035863	2636.55	-0.154621	0.21051	-0.734505	0.462641	0.649124
ENSMUSG00000035852	1.82142	1.02138	1.60806	0.635164	0.525321	NA
ENSMUSG00000091994	116.99	-0.218622	0.281731	-0.775996	0.437752	0.628008
ENSMUSG00000006498	1970.89	-0.662277	0.232069	-2.8538	0.00432004	0.0221971
ENSMUSG00000035835	116.91	0.250416	0.29843	0.839112	0.401407	0.594722
ENSMUSG00000013833	489.397	-0.328943	0.217218	-1.51434	0.129939	0.280088
ENSMUSG00000095023	9.53652	-0.971605	0.818571	-1.18695	0.235246	0.421041
ENSMUSG00000035781	1259.23	-0.0278151	0.159065	-0.174867	0.861185	0.926704
ENSMUSG00000035773	20.6683	0.68264	0.721712	0.945862	0.344219	0.541164
ENSMUSG00000019564	211.868	0.0539871	0.216925	0.248875	0.803458	0.89175
ENSMUSG00000035754	1931.07	0.327054	0.200114	1.63434	0.102187	0.235854
ENSMUSG00000035745	26.5116	0.00473133	0.594091	0.00796398	0.993646	0.996617
ENSMUSG00000013858	5261.86	0.516424	0.222263	2.32348	0.0201532	0.072087
ENSMUSG00000095615	11.5809	-1.26297	0.695542	-1.8158	0.0694003	0.179049
ENSMUSG00000004665	6860.18	0.0709277	0.254967	0.278184	0.780871	0.878506
ENSMUSG00000035722	2710.4	-0.429377	0.224115	-1.91588	0.0553809	0.152175
ENSMUSG00000035697	4.63976	-1.22316	1.28968	-0.94842	0.342916	0.53971
ENSMUSG00000004667	3029.6	0.670511	0.231438	2.89716	0.00376562	0.0199291
ENSMUSG00000075706	12607.5	0.512552	0.242737	2.11155	0.0347247	0.107739
ENSMUSG00000035673	1598.65	0.194716	0.183628	1.06038	0.288971	0.482
ENSMUSG00000003068	3557.13	0.516142	0.176696	2.92107	0.0034883	0.0187854
ENSMUSG00000035640	114.817	-0.37496	0.310679	-1.20691	0.227468	0.411646
ENSMUSG00000003072	10154.9	0.756054	0.256182	2.95124	0.003165	0.017458
ENSMUSG00000035621	3610.69	0.0610077	0.170772	0.357247	0.720907	0.839946
ENSMUSG00000045193	1166.28	-0.186153	0.201799	-0.922469	0.356284	0.552637
ENSMUSG00000035595	117.651	0.14442	0.282587	0.511063	0.609307	0.764368
ENSMUSG00000003070	202.941	-0.0539848	0.301249	-0.179203	0.857778	0.924414
ENSMUSG00000020156	1014.74	-0.0273036	0.205817	-0.13266	0.894463	0.944956
ENSMUSG00000020153	3288.51	1.11962	0.29892	3.74556	0.00017999	0.00169254
ENSMUSG00000020150	1640.63	0.314951	0.319111	0.986964	0.32366	0.519295
ENSMUSG00000069565	3124.67	0.653322	0.172883	3.77899	0.000157463	0.00152256
ENSMUSG00000087672	15.9593	0.328845	0.672276	0.489152	0.624734	0.775395
ENSMUSG00000063457	23628.9	0.746068	0.25551	2.91991	0.00350128	0.018845
ENSMUSG00000020135	129.571	-1.45882	0.325688	-4.47918	7.49e-06	0.000114947
ENSMUSG00000020133	774.633	-0.668825	0.196568	-3.40251	0.00066771	0.00496358
ENSMUSG00000020131	56.4137	0.446187	0.381086	1.17083	0.241668	0.428809
ENSMUSG00000035504	288.961	-0.131232	0.296179	-0.443082	0.657707	0.798863
ENSMUSG00000043822	650.127	0.287172	0.319	0.900226	0.368	0.564077
ENSMUSG00000048696	974.094	-0.0905767	0.227873	-0.397488	0.691008	0.820071
ENSMUSG00000035478	1208.84	0.272464	0.214924	1.26772	0.204896	0.384259
ENSMUSG00000020163	3877.6	0.376847	0.301308	1.2507	0.211042	0.392309
ENSMUSG00000020167	2335.64	-0.024417	0.232718	-0.104921	0.916438	0.957237
ENSMUSG00000003341	2.15023	0.499555	1.87149	0.266928	0.789524	NA
ENSMUSG00000047417	831.19	0.168546	0.181176	0.930286	0.352223	0.548604
ENSMUSG00000035397	354.828	-0.000207406	0.214742	-0.000965839	0.999229	0.99988
ENSMUSG00000097013	10.3607	-1.28661	0.782774	-1.64366	0.100246	0.232988
ENSMUSG00000003346	767.196	0.463721	0.270212	1.71614	0.086137	0.209197
ENSMUSG00000100201	17.0084	-0.475556	0.560038	-0.849149	0.395798	0.590298
ENSMUSG00000035370	36.3087	-0.489819	0.494033	-0.99147	0.321456	0.516535
ENSMUSG00000078441	1.83536	-3.10163	1.96074	-1.58187	0.11368	NA
ENSMUSG00000003345	4605.59	0.143348	0.207531	0.69073	0.489735	0.673326
ENSMUSG00000003344	1345.09	0.27198	0.235011	1.15731	0.247145	0.435627
ENSMUSG00000020190	7298.15	1.21213	0.335408	3.61389	0.000301636	0.00258751
ENSMUSG00000097889	9.93718	-0.667518	0.883897	-0.755199	0.450129	0.638801
ENSMUSG00000003348	178.125	-0.445405	0.275979	-1.61391	0.106547	0.242934
ENSMUSG00000055862	55.4032	0.397888	0.407678	0.975988	0.32907	0.525266
ENSMUSG00000020198	2859.41	-0.962171	0.191442	-5.02592	5.01e-07	1.07e-05
ENSMUSG00000061589	790.922	0.84191	0.174974	4.81164	1.5e-06	2.81e-05
ENSMUSG00000075558	9.6975	0.952585	0.77327	1.23189	0.21799	0.400216
ENSMUSG00000035278	576.631	0.562292	0.200728	2.80126	0.00509039	0.025136
ENSMUSG00000020211	880.937	-0.0238962	0.177571	-0.134572	0.89295	0.944175
ENSMUSG00000035262	4.55196	0.139443	1.09388	0.127476	0.898563	0.947357
ENSMUSG00000020216	7121.73	0.41061	0.291035	1.41086	0.158286	0.321591
ENSMUSG00000035242	7652.4	0.305662	0.260342	1.17408	0.240363	0.427381
ENSMUSG00000051067	3.67665	0.127704	1.38949	0.0919074	0.926772	NA
ENSMUSG00000035215	482.678	0.391955	0.222102	1.76475	0.0776059	0.194773
ENSMUSG00000035206	751.998	-0.146988	0.240588	-0.610955	0.54123	0.714386
[truncated: 17,816 more rows]
